# Supplementary material for: Global Transcriptome Profiling of Multiple Porcine Organs Reveals Toxoplasma gondii-Induced Transcriptional Landscapes
Source: Front Immunol. 2019 Jul 3;10:1531. doi: 10.3389/fimmu.2019.01531 (PMC6618905; doi:10.3389/fimmu.2019.01531)
Supplement: Supplementary Table 4 — Significantly enriched GO terms and pathways of DETs in the lower expression cluster in most infected tissues. [file Table_4.XLSX]

## Sheet: lower in most infected tissues
##Databases: KEGG PATHWAY, Gene Ontology
##Statistical test method: hypergeometric test / Fisher's exact test
##FDR correction method: Benjamini and Hochberg
KEGG pathways
#Term	Database	KEGG ID	Input number	Background number	P-Value	Corrected P-Value	Input protein ID	Hyperlink
Steroid biosynthesis	KEGG PATHWAY	ssc00100	8	16	3.82793e-08	3.61881e-05	O46420|D0G6Y2|D0G6S5|D0G6X3|F1RQU7|I3LGJ8|A7L861|Q6UGB2	http://www.genome.jp/kegg-bin/show_pathway?ssc00100/ssc:100625138%09red/ssc:100312971%09red/ssc:403334%09red/ssc:100155418%09red/ssc:100312968%09red/ssc:100514510%09red/ssc:396590%09red/ssc:100113409%09red
Metabolic pathways	KEGG PATHWAY	ssc01100	35	709	3.67872e-05	0.00311272	K7GN83|Q6Q2C2|I3LDY2|D0G6R7|D0G6X3|F1RF49|D0G6X4|A5GFY8|Q8SQ69|Q8SQ67|Q29095|F1SGX4|B8XY19|D0G6S5|O46420|I3LGJ8|I3LEI1|F1RZV7|F1RJ25|Q6UGB2|P46410|P37111|D0G6Y2|Q8HXW0|F1RUD4|D0G6Y1|Q1W675|C7S800|F1ST54|A0A0K1TQQ7|F1SJ26|I3L688|F1RQU7|A5YV76|A7L861	http://www.genome.jp/kegg-bin/show_pathway?ssc01100/ssc:100312971%09red/ssc:100622246%09red/ssc:100312973%09red/ssc:100625942%09red/ssc:100113409%09red/ssc:100312964%09red/ssc:100522018%09red/ssc:100144446%09red/ssc:396930%09red/ssc:100516938%09red/ssc:403103%09red/ssc:403104%09red/ssc:100625138%09red/ssc:100144529%09red/ssc:403334%09red/ssc:396590%09red/ssc:100518817%09red/ssc:414425%09red/ssc:3…
Arachidonic acid metabolism	KEGG PATHWAY	ssc00590	7	38	6.88116e-05	0.00457945	Q6Q2C2|A0A0K1TQQ7|F1RF49|I3LEI1|Q8SQ67|Q29095|F1SGX4	http://www.genome.jp/kegg-bin/show_pathway?ssc00590/ssc:100620614%09red/ssc:100622246%09red/ssc:100512990%09red/ssc:414425%09red/ssc:100520063%09red/ssc:403104%09red/ssc:397456%09red
PPAR signaling pathway	KEGG PATHWAY	ssc03320	8	63	0.000217897	0.0102429	D2D0E4|A4D7T6|O02772|Q6RWA7|B0FPB3|Q8WMN7|E0AD19|P18648	http://www.genome.jp/kegg-bin/show_pathway?ssc03320/ssc:574075%09red/ssc:397527%09red/ssc:397691%09red/ssc:100135661%09red/ssc:444997%09red/ssc:399532%09red/ssc:396670%09red
Metabolism of xenobiotics by cytochrome P450	KEGG PATHWAY	ssc00980	6	34	0.000283386	0.0120853	P79381|F1S7C8|A0A0K1TQQ7|F1SJ26|Q8SQ69|F1SGX4	http://www.genome.jp/kegg-bin/show_pathway?ssc00980/ssc:100152951%09red/ssc:100622246%09red/ssc:397639%09red/ssc:100512990%09red/ssc:100152910%09red/ssc:403103%09red
Terpenoid backbone biosynthesis	KEGG PATHWAY	ssc00900	4	13	0.000522152	0.0178843	Q1W675|D0G6X4|C7S800|I3LDY2	http://www.genome.jp/kegg-bin/show_pathway?ssc00900/ssc:100144446%09red/ssc:100153932%09red/ssc:100625049%09red
Chemical carcinogenesis	KEGG PATHWAY	ssc05204	6	42	0.000777015	0.0233617	P79381|F1S7C8|A0A0K1TQQ7|F1SJ26|Q8SQ69|Q8SQ67	http://www.genome.jp/kegg-bin/show_pathway?ssc05204/ssc:100152951%09red/ssc:100622246%09red/ssc:397639%09red/ssc:100152910%09red/ssc:403103%09red/ssc:403104%09red
Protein digestion and absorption	KEGG PATHWAY	ssc04974	6	43	0.000868629	0.0241544	F1RTT3|Q58K79|F1RYI8|A0A097ZMY9|K7GMJ2|D2WKD8	http://www.genome.jp/kegg-bin/show_pathway?ssc04974/ssc:541593%09red/ssc:100511536%09red/ssc:100628118%09red/ssc:396828%09red/ssc:100155319%09red/ssc:100152001%09red
Bile secretion	KEGG PATHWAY	ssc04976	6	43	0.000868629	0.0241544	P79381|A0A140H1A1|Q58K79|Q1W675|C7S800|D2WKD8	http://www.genome.jp/kegg-bin/show_pathway?ssc04976/ssc:397404%09red/ssc:397639%09red/ssc:541593%09red/ssc:396828%09red/ssc:100144446%09red
Nitrogen metabolism	KEGG PATHWAY	ssc00910	3	7	0.00129773	0.0324519	P46410|Q5S1S4|F1RXC1	http://www.genome.jp/kegg-bin/show_pathway?ssc00910/ssc:396944%09red/ssc:494016%09red/ssc:100153915%09red
Biosynthesis of unsaturated fatty acids	KEGG PATHWAY	ssc01040	3	9	0.00229914	0.0461621	Q6RWA7|D2D0E4|B0FPB3	http://www.genome.jp/kegg-bin/show_pathway?ssc01040/ssc:396670%09red/ssc:100135661%09red/ssc:444997%09red
GO terms
#Term	Database	GO ID	Input number	Background number	P-Value	Corrected P-Value	Input protein ID	Hyperlink
extracellular region	Gene Ontology	GO:0005576	67	1333	1.07e-09	3.17e-06	F1SA12|I3L9I6|K7GN83|Q9BDY8|F1SUL7|P24853|P20112|Q6EKW4|G9BFT5|F2Z592|F1RVS9|F1RXC1|A7XNM3|F1RPC1|P01214|Q29095|F1SGX4|P18648|F1RPC8|B7U3Y7|A5A4L7|K7GLR4|P22298|F1RPV5|F1RYL4|F1RX31|I3L5T9|F1SFS3|D2WKD8|C3VMK7|F1RK74|F1RJ25|P81608|P09889|Q29041|C4TP28|J9JIL4|E3W6T5|C7AI81|F1RF49|P04088|F1S153|I3LDX9|K7GMJ2|I3LTZ8|F1SIW2|Q28985|P23695|F1S279|F1S395|F1SQ09|F1SQ08|F1RIP4|F1RWK2|P02540|K7GPF5|Q9GK37|…	http://amigo.geneontology.org/cgi-bin/amigo/term_details?term=GO:0005576
lipid biosynthetic process	Gene Ontology	GO:0008610	19	156	1.89e-08	2.79e-05	F1S3B8|Q712P7|I3LDY2|D0G6S5|P79386|F1RF49|D0G6X4|F1RQU7|I3LGJ8|I3LEI1|Q6RWA7|C7S800|B0FPB3|Q29095|Q1W675|F1SEX1|P18648|O46420|Q6UGB2	http://amigo.geneontology.org/cgi-bin/amigo/term_details?term=GO:0008610
small molecule biosynthetic process	Gene Ontology	GO:0044283	17	130	4.28e-08	3.62e-05	F1S3B8|Q712P7|O46420|D0G6R7|P46410|F1RF49|Q8HXW0|I3LGJ8|I3LEI1|Q6RWA7|C7S800|B0FPB3|A5GFY8|Q29095|Q1W675|P18648|Q6UGB2	http://amigo.geneontology.org/cgi-bin/amigo/term_details?term=GO:0044283
organic acid biosynthetic process	Gene Ontology	GO:0016053	13	76	1.11e-07	7.05e-05	F1S3B8|Q712P7|F1RF49|P46410|D0G6R7|Q8HXW0|I3LEI1|Q6RWA7|B0FPB3|A5GFY8|Q29095|P18648|Q6UGB2	http://amigo.geneontology.org/cgi-bin/amigo/term_details?term=GO:0016053
enzyme linked receptor protein signaling pathway	Gene Ontology	GO:0007167	22	238	1.31e-07	7.05e-05	F1S3B8|Q2HWD6|Q9BDY8|F1SJJ2|P24853|F2Z592|D3K5K5|F1RSE2|F1RX31|I3LTZ8|Q95JH1|P04088|B2DCZ9|Q28985|F1S279|P24786|E3W6T5|P16611|F1RYI8|I3LC14|Q6RVA9|F1SEX1	http://amigo.geneontology.org/cgi-bin/amigo/term_details?term=GO:0007167
lipid metabolic process	Gene Ontology	GO:0006629	26	333	2.03e-07	9.24e-05	F1S3B8|Q6Q2C2|I3LDY2|F1RF49|D0G6X4|F1RPC1|Q29095|P18648|B3F0B7|D0G6S5|Q29073|I3LGJ8|I3LEI1|Q6UGB2|O46420|B0FPB3|Q1W675|C7S800|D2D0E5|P79386|F1SJ26|Q712P7|F1RQU7|Q6RWA7|Q6RVA9|F1SEX1	http://amigo.geneontology.org/cgi-bin/amigo/term_details?term=GO:0006629
sterol biosynthetic process	Gene Ontology	GO:0016126	8	22	2.7e-07	0.000106737	O46420|D0G6S5|F1RQU7|I3LGJ8|C7S800|Q1W675|P18648|Q6UGB2	http://amigo.geneontology.org/cgi-bin/amigo/term_details?term=GO:0016126
extracellular region part	Gene Ontology	GO:0044421	54	1123	3.39e-07	0.000117982	F1SA12|I3L9I6|K7GN83|F1SUL7|P24853|P20112|Q6EKW4|G9BFT5|F1RF49|F1RVS9|A7XNM3|F1RPC1|F1SGX4|P18648|F1RPC8|B7U3Y7|A5A4L7|K7GLR4|P22298|F1RPV5|F1RYL4|F1RX31|I3L5T9|F1SFS3|D2WKD8|C3VMK7|F1RK74|F1RJ25|F1RXC1|C4TP28|C7AI81|P04088|P23695|I3LDX9|K7GMJ2|I3LTZ8|F1SIW2|Q28985|F1S279|F1S395|F1SQ09|F1SQ08|F1RIP4|F1RWK2|P02540|K7GPF5|Q9GK37|P16611|Q9XSD9|F1RYI8|E3W6T5|I3LC14|A5A752|F1SEX1	http://amigo.geneontology.org/cgi-bin/amigo/term_details?term=GO:0044421
growth factor binding	Gene Ontology	GO:0019838	9	35	5.59e-07	0.000174364	F1S3B8|P24853|P16611|F1RYI8|E3W6T5|I3L5T9|Q28985|F1S279|F1SEX1	http://amigo.geneontology.org/cgi-bin/amigo/term_details?term=GO:0019838
steroid biosynthetic process	Gene Ontology	GO:0006694	10	48	6.99e-07	0.000197024	F1S3B8|P79386|D0G6S5|O46420|F1RQU7|I3LGJ8|C7S800|Q1W675|P18648|Q6UGB2	http://amigo.geneontology.org/cgi-bin/amigo/term_details?term=GO:0006694
carboxylic acid metabolic process	Gene Ontology	GO:0019752	20	229	1.15e-06	0.000269607	F1S3B8|Q712P7|P37111|B3F0B7|D0G6R7|F1SJ26|P46410|F1RF49|Q6RWA7|Q8HXW0|I3LEI1|Q29073|F1RZV7|B0FPB3|A5GFY8|Q6RVA9|F1RJ25|P18648|Q29095|Q6UGB2	http://amigo.geneontology.org/cgi-bin/amigo/term_details?term=GO:0019752
single-organism biosynthetic process	Gene Ontology	GO:0044711	26	368	1.22e-06	0.000269607	F1S3B8|I3LDY2|D0G6R7|F1RF49|D0G6X4|A5GFY8|Q29095|Q28998|D0G6S5|I3LGJ8|I3LEI1|Q6UGB2|O46420|Q8HXW0|F1RUD4|P46410|B0FPB3|Q1W675|C7S800|P18648|P79386|F1SJ26|Q712P7|F1RQU7|Q6RWA7|F1SEX1	http://amigo.geneontology.org/cgi-bin/amigo/term_details?term=GO:0044711
oxoacid metabolic process	Gene Ontology	GO:0043436	20	230	1.23e-06	0.000269607	F1S3B8|Q712P7|P37111|B3F0B7|D0G6R7|F1SJ26|P46410|F1RF49|Q6RWA7|Q8HXW0|I3LEI1|Q29073|F1RZV7|B0FPB3|A5GFY8|Q6RVA9|F1RJ25|P18648|Q29095|Q6UGB2	http://amigo.geneontology.org/cgi-bin/amigo/term_details?term=GO:0043436
carboxylic acid biosynthetic process	Gene Ontology	GO:0046394	11	66	1.36e-06	0.000278554	F1S3B8|Q8HXW0|P46410|Q712P7|I3LEI1|Q6RWA7|B0FPB3|A5GFY8|Q29095|P18648|Q6UGB2	http://amigo.geneontology.org/cgi-bin/amigo/term_details?term=GO:0046394
insulin-like growth factor binding	Gene Ontology	GO:0005520	6	12	2.1e-06	0.000400425	P24853|P16611|E3W6T5|Q28985|F1S279|F1SEX1	http://amigo.geneontology.org/cgi-bin/amigo/term_details?term=GO:0005520
regulation of cell growth	Gene Ontology	GO:0001558	12	86	2.41e-06	0.000433248	P24853|P16611|F1RF49|F1RYL4|F1RX31|E3W6T5|F1SIW2|Q28985|F1S279|F1SQX0|F1RSI1|F1SEX1	http://amigo.geneontology.org/cgi-bin/amigo/term_details?term=GO:0001558
oxidoreductase activity	Gene Ontology	GO:0016491	23	313	2.85e-06	0.000475458	Q8WN98|F1RF49|A5GFY8|F1SGX4|F1S3P7|Q29073|I3LEI1|F1S395|Q6UGB2|O46420|Q8HXW0|Q8HZK2|B0FPB3|Q1W675|C7S800|D2D0E5|F1ST54|F1SJ26|D0G6R7|F1RQU7|Q6RWA7|Q95245|A7L861	http://amigo.geneontology.org/cgi-bin/amigo/term_details?term=GO:0016491
monocarboxylic acid metabolic process	Gene Ontology	GO:0032787	15	141	2.97e-06	0.000475458	F1S3B8|Q712P7|B3F0B7|D0G6R7|F1SJ26|F1RF49|Q6RWA7|I3LEI1|Q29073|B0FPB3|Q6RVA9|F1RJ25|P18648|Q29095|Q6UGB2	http://amigo.geneontology.org/cgi-bin/amigo/term_details?term=GO:0032787
small molecule metabolic process	Gene Ontology	GO:0044281	32	557	4.66e-06	0.000655301	F1S3B8|Q8WN98|G9BFT5|F1RF49|A5GFY8|Q29095|P18648|D2WKD8|Q712P7|B3F0B7|O46420|Q28998|Q6RWA7|I3LGJ8|I3LEI1|F1RZV7|P23695|F1RJ25|Q5S1S4|Q6UGB2|P37111|Q8HXW0|P46410|K7GMJ2|B0FPB3|Q1W675|C7S800|F1RXC1|F1SJ26|D0G6R7|Q29073|Q6RVA9	http://amigo.geneontology.org/cgi-bin/amigo/term_details?term=GO:0044281
organic hydroxy compound biosynthetic process	Gene Ontology	GO:1901617	9	47	4.7e-06	0.000655301	O46420|D0G6S5|F1RF49|F1RQU7|I3LGJ8|C7S800|Q1W675|P18648|Q6UGB2	http://amigo.geneontology.org/cgi-bin/amigo/term_details?term=GO:1901617
iron ion binding	Gene Ontology	GO:0005506	10	61	4.76e-06	0.000655301	D0G6R7|O46420|Q8WN98|F1SJ26|F1RF49|Q6RWA7|Q6UGB2|F1RGX4|P02067|P09889	http://amigo.geneontology.org/cgi-bin/amigo/term_details?term=GO:0005506
single-organism metabolic process	Gene Ontology	GO:0044710	54	1228	4.99e-06	0.00065621	F1S3B8|Q2HWD6|Q6Q2C2|I3LDY2|Q8WN98|G9BFT5|F1RF49|D0G6X4|C7S800|F1RPC1|A5GFY8|Q29095|F1SGX4|P18648|D2WKD8|F1S3P7|Q712P7|B3F0B7|D0G6S5|O46420|Q28998|Q6RWA7|F1RX31|I3LEI1|F1RZV7|P23695|F1S395|F1RJ25|A5A752|Q5S1S4|Q6UGB2|P37111|Q8HXW0|P04088|P46410|Q8HZK2|B2DCZ9|K7GMJ2|B0FPB3|Q1W675|I3LGJ8|F1RXC1|F1RUD4|D2D0E5|F1ST54|P79386|F1SJ26|D0G6R7|F1RQU7|Q29073|Q95245|Q6RVA9|F1SEX1|A7L861	http://amigo.geneontology.org/cgi-bin/amigo/term_details?term=GO:0044710
response to organic substance	Gene Ontology	GO:0010033	36	679	6.25e-06	0.000788247	F1S3B8|Q8MIZ3|F1SJJ2|P24853|Q6EKW4|F2Z592|Q2HWD6|P27594|D3K5K5|F1RSE2|D2WKD8|P22298|F1RX31|I3L5T9|F1RZV7|I3LTZ8|J9JIL4|Q95JH1|P04088|Q8HZK2|B2DCZ9|K7GMJ2|Q28985|F1SQX0|F1RIP4|P79381|P24786|P79386|E3W6T5|P16611|Q9XSD9|F1RYI8|P49922|I3LC14|Q6RVA9|F1SEX1	http://amigo.geneontology.org/cgi-bin/amigo/term_details?term=GO:0010033
organic acid metabolic process	Gene Ontology	GO:0006082	20	259	6.64e-06	0.000802834	F1S3B8|Q712P7|P37111|B3F0B7|D0G6R7|F1SJ26|P46410|F1RF49|Q6RWA7|Q8HXW0|I3LEI1|Q29073|F1RZV7|B0FPB3|A5GFY8|Q6RVA9|F1RJ25|P18648|Q29095|Q6UGB2	http://amigo.geneontology.org/cgi-bin/amigo/term_details?term=GO:0006082
proteinaceous extracellular matrix	Gene Ontology	GO:0005578	10	66	8.89e-06	0.00103284	I3LC14|F1SUL7|Q9XSD9|P20112|F1RYI8|F1SFS3|F1S279|F1SQ09|F1SQ08|F1SEX1	http://amigo.geneontology.org/cgi-bin/amigo/term_details?term=GO:0005578
response to endogenous stimulus	Gene Ontology	GO:0009719	24	363	9.42e-06	0.00105245	F1S3B8|F1SJJ2|P24853|Q95JH1|F1RSE2|D2WKD8|F1RX31|I3L5T9|F1RZV7|I3LTZ8|F2Z592|P04088|Q8HZK2|B2DCZ9|Q28985|F1SQX0|P79386|E3W6T5|P16611|F1RYI8|P49922|I3LC14|Q6RVA9|F1SEX1	http://amigo.geneontology.org/cgi-bin/amigo/term_details?term=GO:0009719
steroid metabolic process	Gene Ontology	GO:0008202	11	83	9.99e-06	0.00107627	F1S3B8|P79386|D0G6S5|F1SJ26|O46420|F1RQU7|I3LGJ8|C7S800|Q1W675|P18648|Q6UGB2	http://amigo.geneontology.org/cgi-bin/amigo/term_details?term=GO:0008202
cellular lipid metabolic process	Gene Ontology	GO:0044255	19	246	1.14e-05	0.00118335	Q6RWA7|Q6Q2C2|I3LDY2|B3F0B7|Q712P7|F1SJ26|F1RPC1|F1RF49|D0G6X4|C7S800|I3LEI1|Q29073|B0FPB3|Q6RVA9|Q29095|Q1W675|F1SEX1|P18648|Q6UGB2	http://amigo.geneontology.org/cgi-bin/amigo/term_details?term=GO:0044255
extracellular space	Gene Ontology	GO:0005615	28	480	1.51e-05	0.00150447	F1SUL7|P24853|P20112|G9BFT5|A7XNM3|F1SGX4|P18648|B7U3Y7|K7GLR4|P22298|F1RPV5|F1RYL4|F1RX31|I3L5T9|F1SFS3|P23695|C7AI81|P04088|I3LDX9|F1SIW2|Q28985|F1SQ09|F1SQ08|Q9GK37|P16611|F1RYI8|E3W6T5|A5A752	http://amigo.geneontology.org/cgi-bin/amigo/term_details?term=GO:0005615
cell growth	Gene Ontology	GO:0016049	12	105	1.55e-05	0.00150447	P24853|P16611|F1RF49|F1RYL4|F1RX31|E3W6T5|F1SIW2|Q28985|F1S279|F1SQX0|F1RSI1|F1SEX1	http://amigo.geneontology.org/cgi-bin/amigo/term_details?term=GO:0016049
monocarboxylic acid biosynthetic process	Gene Ontology	GO:0072330	8	46	2.98e-05	0.00274374	F1S3B8|Q712P7|I3LEI1|Q6RWA7|B0FPB3|Q29095|P18648|Q6UGB2	http://amigo.geneontology.org/cgi-bin/amigo/term_details?term=GO:0072330
oxidation-reduction process	Gene Ontology	GO:0055114	23	365	3.01e-05	0.00274374	Q8WN98|F1RF49|A5GFY8|F1SGX4|P18648|F1S3P7|Q29073|F1S395|Q6UGB2|O46420|Q8HXW0|Q8HZK2|B0FPB3|Q1W675|C7S800|D2D0E5|F1ST54|F1SJ26|D0G6R7|F1RQU7|Q6RWA7|Q95245|A7L861	http://amigo.geneontology.org/cgi-bin/amigo/term_details?term=GO:0055114
extracellular matrix	Gene Ontology	GO:0031012	11	95	3.16e-05	0.00279192	I3LC14|F1SUL7|F1RPV5|Q9XSD9|P20112|F1RYI8|F1SFS3|F1S279|F1SQ09|F1SQ08|F1SEX1	http://amigo.geneontology.org/cgi-bin/amigo/term_details?term=GO:0031012
unsaturated fatty acid metabolic process	Gene Ontology	GO:0033559	6	22	3.51e-05	0.00300877	F1RF49|Q29073|I3LEI1|Q6RWA7|B0FPB3|Q29095	http://amigo.geneontology.org/cgi-bin/amigo/term_details?term=GO:0033559
organic hydroxy compound metabolic process	Gene Ontology	GO:1901615	12	116	3.84e-05	0.00315791	O46420|Q8WN98|F1RF49|F1RQU7|I3LGJ8|Q8HZK2|C7S800|D0G6S5|Q1W675|P18648|F1RPC8|Q6UGB2	http://amigo.geneontology.org/cgi-bin/amigo/term_details?term=GO:1901615
insulin-like growth factor II binding	Gene Ontology	GO:0031995	4	6	5.23e-05	0.00403604	P24853|P16611|Q28985|E3W6T5	http://amigo.geneontology.org/cgi-bin/amigo/term_details?term=GO:0031995
insulin-like growth factor I binding	Gene Ontology	GO:0031994	4	6	5.23e-05	0.00403604	P24853|P16611|Q28985|E3W6T5	http://amigo.geneontology.org/cgi-bin/amigo/term_details?term=GO:0031994
isoprenoid metabolic process	Gene Ontology	GO:0006720	6	24	5.32e-05	0.00403604	I3LDY2|B3F0B7|F1SJ26|D0G6X4|Q1W675|C7S800	http://amigo.geneontology.org/cgi-bin/amigo/term_details?term=GO:0006720
extracellular matrix organization	Gene Ontology	GO:0030198	8	51	5.76e-05	0.00413258	F1S3B8|Q95JH1|F1RPV5|F1RYI8|F1RX31|I3LC14|F1SQ09|F1SEX1	http://amigo.geneontology.org/cgi-bin/amigo/term_details?term=GO:0030198
extracellular structure organization	Gene Ontology	GO:0043062	8	51	5.76e-05	0.00413258	F1S3B8|Q95JH1|F1RPV5|F1RYI8|F1RX31|I3LC14|F1SQ09|F1SEX1	http://amigo.geneontology.org/cgi-bin/amigo/term_details?term=GO:0043062
blood vessel development	Gene Ontology	GO:0001568	14	163	5.86e-05	0.00413258	F1RYI8|Q9BDY8|F1SJJ2|C7AI81|Q95JH1|F1RF49|F1SJF5|F1RX31|F1S279|I3LAA3|Q6RVA9|F1RSI1|F1SEX1|F1RSE2	http://amigo.geneontology.org/cgi-bin/amigo/term_details?term=GO:0001568
binding	Gene Ontology	GO:0005488	116	3701	6.03e-05	0.00415246	I3L9I6|F1RS30|Q6EKW4|Q95JH1|D3K5K5|F1RIP4|Q9BDY8|F1SUL7|F1RGX4|F1RYL4|F1RX31|P23695|F1SFS3|P09889|P02067|Q8HXW0|P04088|Q1W675|E0AD19|P02540|K7GPF5|E3W6T5|F1SJ26|D0G6R7|Q29073|Q866Y3|Q6RVA9|F1RSI1|Q2HWD6|G9BFT5|A7XNM3|A5GFY8|F1SGX4|P18648|D2WKD8|B7U3Y7|B3F0B7|O46420|P20112|Q28998|I3LEI1|F1SAL3|Q29041|J9JIL4|C7AI81|Q8HZK2|B2DCZ9|I3LDX9|F1SIW2|Q06AV5|F1SQ09|I3LQD0|F1S7C8|Q9XSD9|I3L688|P29269|B2ZHY2|…	http://amigo.geneontology.org/cgi-bin/amigo/term_details?term=GO:0005488
sterol metabolic process	Gene Ontology	GO:0016125	8	52	6.51e-05	0.00438401	O46420|D0G6S5|F1RQU7|I3LGJ8|C7S800|Q1W675|P18648|Q6UGB2	http://amigo.geneontology.org/cgi-bin/amigo/term_details?term=GO:0016125
vasculature development	Gene Ontology	GO:0001944	14	167	7.48e-05	0.00486653	F1RYI8|Q9BDY8|F1SJJ2|C7AI81|Q95JH1|F1RF49|F1SJF5|F1RX31|F1S279|I3LAA3|Q6RVA9|F1RSI1|F1SEX1|F1RSE2	http://amigo.geneontology.org/cgi-bin/amigo/term_details?term=GO:0001944
cell surface receptor signaling pathway	Gene Ontology	GO:0007166	34	708	8.18e-05	0.00521114	F1S3B8|Q2HWD6|Q9BDY8|F1SJJ2|P24853|Q6EKW4|F2Z592|F1SJF5|D3K5K5|F1SMQ2|F1RSE2|F1SUL7|F1RYL4|F1RX31|I3L5T9|F1RZV7|I3LTZ8|Q95JH1|P04088|Q8HZK2|B2DCZ9|F1SIW2|Q28985|F1S279|A5A752|P24786|E3W6T5|P16611|Q9XSD9|F1RYI8|I3LC14|Q6RVA9|F1RSI1|F1SEX1	http://amigo.geneontology.org/cgi-bin/amigo/term_details?term=GO:0007166
negative regulation of locomotion	Gene Ontology	GO:0040013	8	55	9.29e-05	0.00559802	F1SIW2|Q6EKW4|F1RYI8|F1RX31|I3L5T9|A7XNM3|F1S279|I3LTZ8	http://amigo.geneontology.org/cgi-bin/amigo/term_details?term=GO:0040013
negative regulation of cellular component movement	Gene Ontology	GO:0051271	8	55	9.29e-05	0.00559802	F1SIW2|Q6EKW4|F1RYI8|F1RX31|I3L5T9|A7XNM3|F1S279|I3LTZ8	http://amigo.geneontology.org/cgi-bin/amigo/term_details?term=GO:0051271
negative regulation of transmembrane receptor protein serine/threonine kinase signaling pathway	Gene Ontology	GO:0090101	6	27	9.36e-05	0.00559802	I3LC14|F1SJJ2|F1RX31|F1S279|I3LTZ8|Q6RVA9	http://amigo.geneontology.org/cgi-bin/amigo/term_details?term=GO:0090101
cellular response to growth factor stimulus	Gene Ontology	GO:0071363	13	150	9.92e-05	0.00582015	P24786|F1SJJ2|F1S3B8|Q95JH1|F2Z592|F1RYI8|F1RX31|I3L5T9|I3LC14|I3LTZ8|Q6RVA9|F1SEX1|F1RSE2	http://amigo.geneontology.org/cgi-bin/amigo/term_details?term=GO:0071363
coenzyme binding	Gene Ontology	GO:0050662	8	56	0.000104102	0.00598638	F1SGX4|Q8HXW0|C7S800|F1RZV7|A5GFY8|Q1W675|A7L861|F1RPC8	http://amigo.geneontology.org/cgi-bin/amigo/term_details?term=GO:0050662
response to growth factor	Gene Ontology	GO:0070848	13	152	0.000112359	0.00633812	P24786|F1SJJ2|F1S3B8|Q95JH1|F2Z592|F1RYI8|F1RX31|I3L5T9|I3LC14|I3LTZ8|Q6RVA9|F1SEX1|F1RSE2	http://amigo.geneontology.org/cgi-bin/amigo/term_details?term=GO:0070848
regulation of heart contraction	Gene Ontology	GO:0008016	7	42	0.000120448	0.0066674	F1SAL2|A7XNM3|F1SAL3|A5A752|Q6RVA9|Q28998|D2WKD8	http://amigo.geneontology.org/cgi-bin/amigo/term_details?term=GO:0008016
hormone activity	Gene Ontology	GO:0005179	9	75	0.000130546	0.00709379	K7GLR4|P01214|P04088|G9BFT5|F1ST92|A7XNM3|P23695|I3LAA3|A5A752	http://amigo.geneontology.org/cgi-bin/amigo/term_details?term=GO:0005179
fatty acid biosynthetic process	Gene Ontology	GO:0006633	7	43	0.000137343	0.00726356	Q712P7|I3LEI1|Q6RWA7|B0FPB3|Q29095|P18648|Q6UGB2	http://amigo.geneontology.org/cgi-bin/amigo/term_details?term=GO:0006633
fatty acid metabolic process	Gene Ontology	GO:0006631	10	94	0.000138575	0.00726356	Q712P7|F1RF49|Q6RWA7|I3LEI1|Q29073|B0FPB3|Q6RVA9|Q29095|P18648|Q6UGB2	http://amigo.geneontology.org/cgi-bin/amigo/term_details?term=GO:0006631
transmembrane receptor protein serine/threonine kinase signaling pathway	Gene Ontology	GO:0007178	10	96	0.00016247	0.00836792	I3LC14|F1SJJ2|P04088|F1RYI8|F1RX31|F1S279|I3LTZ8|Q6RVA9|F1SEX1|F1RSE2	http://amigo.geneontology.org/cgi-bin/amigo/term_details?term=GO:0007178
angiogenesis	Gene Ontology	GO:0001525	11	116	0.000165476	0.00837705	Q9BDY8|Q95JH1|F1RF49|F1SJF5|F1RX31|F1S279|I3LAA3|Q6RVA9|F1RSI1|F1SEX1|F1RSE2	http://amigo.geneontology.org/cgi-bin/amigo/term_details?term=GO:0001525
collagen fibril organization	Gene Ontology	GO:0030199	4	9	0.000168701	0.00839678	F1SQ09|F1RPV5|F1RYI8|F1RX31	http://amigo.geneontology.org/cgi-bin/amigo/term_details?term=GO:0030199
secondary alcohol biosynthetic process	Gene Ontology	GO:1902653	5	19	0.000187248	0.00901683	Q1W675|C7S800|P18648|O46420|I3LGJ8	http://amigo.geneontology.org/cgi-bin/amigo/term_details?term=GO:1902653
cholesterol biosynthetic process	Gene Ontology	GO:0006695	5	19	0.000187248	0.00901683	Q1W675|C7S800|P18648|O46420|I3LGJ8	http://amigo.geneontology.org/cgi-bin/amigo/term_details?term=GO:0006695
blood vessel morphogenesis	Gene Ontology	GO:0048514	12	139	0.000190318	0.00901803	F1RYI8|Q9BDY8|Q95JH1|F1RF49|F1SJF5|F1RX31|F1S279|I3LAA3|Q6RVA9|F1RSI1|F1SEX1|F1RSE2	http://amigo.geneontology.org/cgi-bin/amigo/term_details?term=GO:0048514
oxidoreductase activity, acting on paired donors, with incorporation or reduction of molecular oxygen	Gene Ontology	GO:0016705	7	47	0.000225205	0.010421	F1S3P7|O46420|F1SJ26|Q6RWA7|B0FPB3|A7L861|Q6UGB2	http://amigo.geneontology.org/cgi-bin/amigo/term_details?term=GO:0016705
single-multicellular organism process	Gene Ontology	GO:0044707	56	1488	0.000241743	0.0110142	Q2HWD6|Q9BDY8|F1SJJ2|F1RS30|Q6EKW4|G9BFT5|F1RF49|F1SJF5|A7XNM3|F1SIM8|F1SHP9|D3K5K5|Q29095|P18648|D2WKD8|Q0Q043|F1SUL7|D0G6S5|Q28998|F1RYL4|F1RX31|I3L5T9|P23695|F1SAL3|F1SAL2|C3VMK7|F1RUD4|J9JIL4|C7AI81|F1SCS2|Q95JH1|P04088|Q8HZK2|B2DCZ9|K7GMJ2|I3LTZ8|F1SIW2|F1RSE2|F1S279|A5A752|F1SQ09|F1SQ08|P24786|K7GPF5|F1S2H6|P79386|F1SJ26|Q712P7|F1RYI8|P29269|F1ST92|I3LC14|I3LAA3|Q6RVA9|F1RSI1|F1SEX1	http://amigo.geneontology.org/cgi-bin/amigo/term_details?term=GO:0044707
negative regulation of cell migration	Gene Ontology	GO:0030336	7	48	0.000253056	0.0113549	Q6EKW4|F1RYI8|F1RX31|I3L5T9|A7XNM3|F1S279|I3LTZ8	http://amigo.geneontology.org/cgi-bin/amigo/term_details?term=GO:0030336
single-organism process	Gene Ontology	GO:0044699	125	4195	0.000264113	0.0115674	F1RPV5|Q6EKW4|Q95JH1|F1SJF5|D3K5K5|Q28998|Q9BDY8|Q0Q043|F1SUL7|D0G6S5|F1RYL4|F1RX31|P23695|F1RS30|F1SFS3|P02067|Q8HXW0|P04088|K7GPF5|Q1W675|F1RGX4|P02540|D2D0E5|E3W6T5|Q8HZV3|D0G6R7|F1RQU7|Q29073|Q866Y3|Q6RVA9|F1RSI1|F1SJ26|Q2HWD6|K7GN83|G9BFT5|A7XNM3|F1SIM8|A5GFY8|F1SGX4|P18648|D2WKD8|B3F0B7|O46420|P20112|I3LGJ8|I3LEI1|F1SAL3|F1SAL2|J9JIL4|C7AI81|Q8HZK2|F1S153|B2DCZ9|F1SIW2|F1SQ09|F1SQ08|F1ST54|…	http://amigo.geneontology.org/cgi-bin/amigo/term_details?term=GO:0044699
regulation of system process	Gene Ontology	GO:0044057	11	123	0.000265604	0.0115674	F1RS30|P04088|F1RSE2|Q28998|A7XNM3|F1SAL3|F1SAL2|Q6RVA9|A5A752|P18648|D2WKD8	http://amigo.geneontology.org/cgi-bin/amigo/term_details?term=GO:0044057
negative regulation of cell motility	Gene Ontology	GO:2000146	7	49	0.000283615	0.0120853	Q6EKW4|F1RYI8|F1RX31|I3L5T9|A7XNM3|F1S279|I3LTZ8	http://amigo.geneontology.org/cgi-bin/amigo/term_details?term=GO:2000146
regulation of transmembrane receptor protein serine/threonine kinase signaling pathway	Gene Ontology	GO:0090092	8	66	0.000290924	0.0122209	I3LC14|F1SJJ2|P04088|F1RX31|F1S279|I3LTZ8|Q6RVA9|F1SEX1	http://amigo.geneontology.org/cgi-bin/amigo/term_details?term=GO:0090092
ameboidal-type cell migration	Gene Ontology	GO:0001667	9	85	0.000309086	0.0126856	Q2HWD6|Q95JH1|F1SIW2|I3L5T9|A7XNM3|F1S279|I3LTZ8|A5A752|F1RSI1	http://amigo.geneontology.org/cgi-bin/amigo/term_details?term=GO:0001667
isoprenoid biosynthetic process	Gene Ontology	GO:0008299	4	11	0.000310554	0.0126856	Q1W675|D0G6X4|C7S800|I3LDY2	http://amigo.geneontology.org/cgi-bin/amigo/term_details?term=GO:0008299
heart contraction	Gene Ontology	GO:0060047	7	50	0.000317072	0.0127756	F1SAL2|A7XNM3|F1SAL3|A5A752|Q6RVA9|Q28998|D2WKD8	http://amigo.geneontology.org/cgi-bin/amigo/term_details?term=GO:0060047
negative regulation of cellular response to growth factor stimulus	Gene Ontology	GO:0090288	6	35	0.000325645	0.012795	F1SJJ2|F1RX31|I3L5T9|I3LC14|I3LTZ8|Q6RVA9	http://amigo.geneontology.org/cgi-bin/amigo/term_details?term=GO:0090288
transmembrane receptor protein tyrosine kinase signaling pathway	Gene Ontology	GO:0007169	12	148	0.000326195	0.012795	P24786|Q2HWD6|Q9BDY8|F1S3B8|P24853|P16611|F2Z592|B2DCZ9|E3W6T5|Q28985|D3K5K5|Q95JH1	http://amigo.geneontology.org/cgi-bin/amigo/term_details?term=GO:0007169
heart process	Gene Ontology	GO:0003015	7	51	0.000353624	0.0136896	F1SAL2|A7XNM3|F1SAL3|A5A752|Q6RVA9|Q28998|D2WKD8	http://amigo.geneontology.org/cgi-bin/amigo/term_details?term=GO:0003015
negative regulation of response to stimulus	Gene Ontology	GO:0048585	19	324	0.000363563	0.0138928	F1S279|F1SJJ2|P79386|F1SIW2|Q6EKW4|F1RF49|F1RYI8|F1RYL4|F1RX31|I3L5T9|B8R2Z9|F1RZV7|I3LC14|F1RPC1|I3LTZ8|Q6RVA9|F1RSI1|Q864Z2|Q9XSD9	http://amigo.geneontology.org/cgi-bin/amigo/term_details?term=GO:0048585
system development	Gene Ontology	GO:0048731	43	1066	0.000389681	0.0145803	Q2HWD6|Q9BDY8|F1SJJ2|F1RS30|Q6EKW4|F1RF49|F1SJF5|A7XNM3|F1SIM8|F1SHP9|D3K5K5|C3VMK7|Q0Q043|F1SUL7|D0G6S5|F1RYL4|F1RX31|I3L5T9|I3LTZ8|J9JIL4|C7AI81|F1SCS2|Q95JH1|F1RUD4|K7GMJ2|F1SIW2|F1RSE2|F1S279|A5A752|F1SQ08|P18648|P24786|K7GPF5|P79386|F1SJ26|Q712P7|F1RYI8|F1ST92|I3LC14|I3LAA3|Q6RVA9|F1RSI1|F1SEX1	http://amigo.geneontology.org/cgi-bin/amigo/term_details?term=GO:0048731
cellular response to chemical stimulus	Gene Ontology	GO:0070887	31	677	0.000391401	0.0145803	F1S3B8|Q8MIZ3|F1SJJ2|Q6EKW4|F2Z592|Q2HWD6|P27594|D3K5K5|F1RSE2|D2WKD8|F1RX31|I3L5T9|I3LTZ8|Q95JH1|P04088|Q8HZK2|B2DCZ9|K7GMJ2|F1S279|A5A752|F1RIP4|P24786|F1S7C8|P79386|F1SJ26|F1RYI8|P49922|I3LC14|Q6RVA9|F1SEX1|Q9XSD9	http://amigo.geneontology.org/cgi-bin/amigo/term_details?term=GO:0070887
cofactor binding	Gene Ontology	GO:0048037	9	89	0.00042231	0.0155363	F1SGX4|F1RUD4|Q8HXW0|C7S800|F1RZV7|A5GFY8|Q1W675|A7L861|F1RPC8	http://amigo.geneontology.org/cgi-bin/amigo/term_details?term=GO:0048037
cellular response to organic substance	Gene Ontology	GO:0071310	27	562	0.000475035	0.0172615	F1S3B8|Q8MIZ3|F1SJJ2|Q6EKW4|F2Z592|Q2HWD6|P27594|D3K5K5|F1RSE2|D2WKD8|F1RX31|I3L5T9|I3LTZ8|Q95JH1|P04088|Q8HZK2|B2DCZ9|K7GMJ2|F1RIP4|P24786|P79386|Q9XSD9|F1RYI8|P49922|I3LC14|Q6RVA9|F1SEX1	http://amigo.geneontology.org/cgi-bin/amigo/term_details?term=GO:0071310
response to peptide	Gene Ontology	GO:1901652	8	72	0.000497098	0.0178443	P24853|P16611|P04088|B2DCZ9|E3W6T5|Q28985|P49922|Q6RVA9	http://amigo.geneontology.org/cgi-bin/amigo/term_details?term=GO:1901652
regulation of cell migration	Gene Ontology	GO:0030334	12	156	0.000508829	0.0178843	F1SIW2|Q95JH1|Q6EKW4|F1RF49|F1RYI8|F1RX31|I3L5T9|A7XNM3|F1S279|I3LTZ8|A5A752|F1SEX1	http://amigo.geneontology.org/cgi-bin/amigo/term_details?term=GO:0030334
regulation of insulin-like growth factor receptor signaling pathway	Gene Ontology	GO:0043567	4	13	0.000522152	0.0178843	P24853|P16611|Q28985|E3W6T5	http://amigo.geneontology.org/cgi-bin/amigo/term_details?term=GO:0043567
protein binding	Gene Ontology	GO:0005515	61	1715	0.000523368	0.0178843	F1S3B8|Q2HWD6|Q08092|Q9BDY8|F1SJJ2|P24853|Q6EKW4|G9BFT5|F2Z592|I3L9I6|A7XNM3|F1RPC1|P01214|P60982|F1SMQ2|P18648|F1RPC8|B7U3Y7|K7GLR4|F1SUL7|F1RYL4|F1RX31|I3L5T9|F1SHJ4|F1RZV7|D2WKD8|F1SAL3|F1S395|F1RJ25|A5A752|P23695|C7AI81|F1SCS2|Q95JH1|P04088|B2DCZ9|I3LDX9|F1SIW2|Q28985|Q06AV5|F1S279|Q6RVA9|F1SQ09|F1RIP4|F1RGX4|F1RPT4|P02540|F1S7C8|P79386|E3W6T5|P16611|F1SJ26|F1RYI8|P29269|F1ST92|I3LJU7|I3LAA3|…	http://amigo.geneontology.org/cgi-bin/amigo/term_details?term=GO:0005515
regulation of cellular component movement	Gene Ontology	GO:0051270	13	180	0.000525386	0.0178843	F1SIW2|Q95JH1|Q6EKW4|F1RF49|F1RYI8|F1RX31|I3L5T9|A7XNM3|F1S279|A5A752|I3LTZ8|Q6RVA9|F1SEX1	http://amigo.geneontology.org/cgi-bin/amigo/term_details?term=GO:0051270
regulation of heart rate	Gene Ontology	GO:0002027	5	25	0.000560827	0.0186617	Q6RVA9|A5A752|Q28998|F1SAL3|F1SAL2	http://amigo.geneontology.org/cgi-bin/amigo/term_details?term=GO:0002027
collagen trimer	Gene Ontology	GO:0005581	5	25	0.000560827	0.0186617	F1SQ09|Q29041|F1RTT3|F1RYI8|B7U3Y7	http://amigo.geneontology.org/cgi-bin/amigo/term_details?term=GO:0005581
blood circulation	Gene Ontology	GO:0008015	10	114	0.000580467	0.0191006	C7AI81|F1SAL2|F1ST92|F1RZV7|F1SAL3|Q6RVA9|A7XNM3|A5A752|Q28998|D2WKD8	http://amigo.geneontology.org/cgi-bin/amigo/term_details?term=GO:0008015
wound healing	Gene Ontology	GO:0042060	9	94	0.000609804	0.0198454	F1S2H6|Q95JH1|F1RF49|F1RYI8|B2DCZ9|P29269|F1S279|Q6RVA9|F1SEX1	http://amigo.geneontology.org/cgi-bin/amigo/term_details?term=GO:0042060
circulatory system process	Gene Ontology	GO:0003013	10	116	0.000658474	0.0208526	C7AI81|F1SAL2|F1ST92|F1RZV7|F1SAL3|Q6RVA9|A7XNM3|A5A752|Q28998|D2WKD8	http://amigo.geneontology.org/cgi-bin/amigo/term_details?term=GO:0003013
unsaturated fatty acid biosynthetic process	Gene Ontology	GO:0006636	4	14	0.000659262	0.0208526	I3LEI1|Q29095|Q6RWA7|B0FPB3	http://amigo.geneontology.org/cgi-bin/amigo/term_details?term=GO:0006636
regulation of growth	Gene Ontology	GO:0040008	12	161	0.000661874	0.0208526	P24853|P16611|F1RF49|F1RYL4|F1RX31|E3W6T5|F1SIW2|Q28985|F1S279|F1SQX0|F1RSI1|F1SEX1	http://amigo.geneontology.org/cgi-bin/amigo/term_details?term=GO:0040008
endoplasmic reticulum membrane	Gene Ontology	GO:0005789	13	185	0.000669228	0.0208623	P79381|F1S3P7|O46420|F1SJ26|Q8HXW0|F1RQU7|Q6RWA7|P27594|B0FPB3|Q6RVA9|Q1W675|C7S800|Q6UGB2	http://amigo.geneontology.org/cgi-bin/amigo/term_details?term=GO:0005789
regulation of multicellular organismal process	Gene Ontology	GO:0051239	30	669	0.000682712	0.021061	F1RS30|F1RF49|F1SJF5|A7XNM3|F1SIM8|F1SHP9|D3K5K5|Q29095|Q28998|D2WKD8|F1RYL4|F1RX31|I3L5T9|F1SAL3|F1SAL2|I3LTZ8|J9JIL4|F1SCS2|P04088|B2DCZ9|F1SIW2|F1RSE2|A5A752|F1SQ09|P18648|F1RYI8|I3LAA3|Q6RVA9|F1RSI1|F1SEX1	http://amigo.geneontology.org/cgi-bin/amigo/term_details?term=GO:0051239
nuclear outer membrane-endoplasmic reticulum membrane network	Gene Ontology	GO:0042175	13	186	0.000701663	0.0214224	P79381|F1S3P7|O46420|F1SJ26|Q8HXW0|F1RQU7|Q6RWA7|P27594|B0FPB3|Q6RVA9|Q1W675|C7S800|Q6UGB2	http://amigo.geneontology.org/cgi-bin/amigo/term_details?term=GO:0042175
receptor binding	Gene Ontology	GO:0005102	24	488	0.000729461	0.0220439	P01214|Q9BDY8|F1SJJ2|Q6EKW4|G9BFT5|F2Z592|A7XNM3|P18648|K7GLR4|F1SUL7|F1RX31|I3L5T9|P23695|Q95JH1|P04088|F1SIW2|F1S279|A5A752|P79386|F1RYI8|F1ST92|I3LAA3|Q6RVA9|F1SEX1	http://amigo.geneontology.org/cgi-bin/amigo/term_details?term=GO:0005102
cardiac muscle cell contraction	Gene Ontology	GO:0086003	4	15	0.000820055	0.0237169	Q6RVA9|A7XNM3|F1SAL3|F1SAL2	http://amigo.geneontology.org/cgi-bin/amigo/term_details?term=GO:0086003
negative regulation of cellular response to transforming growth factor beta stimulus	Gene Ontology	GO:1903845	4	15	0.000820055	0.0237169	I3LTZ8|Q6RVA9|F1SJJ2|I3LC14	http://amigo.geneontology.org/cgi-bin/amigo/term_details?term=GO:1903845
negative regulation of transforming growth factor beta receptor signaling pathway	Gene Ontology	GO:0030512	4	15	0.000820055	0.0237169	I3LTZ8|Q6RVA9|F1SJJ2|I3LC14	http://amigo.geneontology.org/cgi-bin/amigo/term_details?term=GO:0030512
cardiovascular system development	Gene Ontology	GO:0072358	15	240	0.000828869	0.0237169	P24786|Q9BDY8|F1SJJ2|C7AI81|Q95JH1|F1RYI8|F1RF49|F1SJF5|F1RX31|F1S279|I3LAA3|Q6RVA9|F1RSI1|F1SEX1|F1RSE2	http://amigo.geneontology.org/cgi-bin/amigo/term_details?term=GO:0072358
circulatory system development	Gene Ontology	GO:0072359	15	240	0.000828869	0.0237169	P24786|Q9BDY8|F1SJJ2|C7AI81|Q95JH1|F1RYI8|F1RF49|F1SJF5|F1RX31|F1S279|I3LAA3|Q6RVA9|F1RSI1|F1SEX1|F1RSE2	http://amigo.geneontology.org/cgi-bin/amigo/term_details?term=GO:0072359
regulation of cell motility	Gene Ontology	GO:2000145	12	166	0.000851821	0.0241404	F1SIW2|Q95JH1|Q6EKW4|F1RF49|F1RYI8|F1RX31|I3L5T9|A7XNM3|F1S279|I3LTZ8|A5A752|F1SEX1	http://amigo.geneontology.org/cgi-bin/amigo/term_details?term=GO:2000145
regulation of cell proliferation	Gene Ontology	GO:0042127	21	406	0.000863925	0.0241544	F1S3B8|K7GPF5|K7GN83|F1SJJ2|F1SQX0|F1SCS2|F1RPV5|F1RF49|F1RYL4|F1RX31|E3W6T5|P24853|I3L5T9|B8R2Z9|F1S279|A5A752|I3LTZ8|Q6RVA9|F1RSI1|F1SEX1|Q95JH1	http://amigo.geneontology.org/cgi-bin/amigo/term_details?term=GO:0042127
single-organism cellular process	Gene Ontology	GO:0044763	109	3631	0.000920143	0.0253489	F1RPV5|Q6EKW4|Q95JH1|F1SJF5|D3K5K5|Q28998|Q9BDY8|Q0Q043|F1SUL7|F1RYL4|F1RX31|P23695|F1RS30|F1SFS3|Q5S1S4|Q8HXW0|P04088|Q1W675|P02540|K7GPF5|E3W6T5|Q8HZV3|D0G6R7|Q29073|Q866Y3|Q6RVA9|F1RSI1|F1SJ26|Q2HWD6|K7GN83|G9BFT5|A7XNM3|F1SIM8|A5GFY8|P18648|D2WKD8|B3F0B7|P20112|I3LEI1|F1SAL3|F1SAL2|J9JIL4|C7AI81|Q8HZK2|F1S153|B2DCZ9|F1SIW2|F1SQ09|F1S2H6|Q9XSD9|Q712P7|P29269|B2ZHY2|P49922|I3LC14|A5A752|F1S3B8|…	http://amigo.geneontology.org/cgi-bin/amigo/term_details?term=GO:0044763
response to oxygen-containing compound	Gene Ontology	GO:1901700	17	297	0.000959594	0.0261921	J9JIL4|P22298|P24853|P16611|P04088|Q8HZK2|Q8MIZ3|B2DCZ9|F1RYI8|E3W6T5|I3L5T9|Q28985|P49922|Q6RVA9|D3K5K5|F1RIP4|D2WKD8	http://amigo.geneontology.org/cgi-bin/amigo/term_details?term=GO:1901700
insulin-like growth factor receptor signaling pathway	Gene Ontology	GO:0048009	4	16	0.00100666	0.0271152	P24853|P16611|Q28985|E3W6T5	http://amigo.geneontology.org/cgi-bin/amigo/term_details?term=GO:0048009
regulation of cellular component organization	Gene Ontology	GO:0051128	26	561	0.00101173	0.0271152	F1S3B8|Q2HWD6|F1SJJ2|P24853|F1RF49|F1SIM8|F1SHP9|D3K5K5|P60982|F1RYL4|F1RX31|I3L5T9|I3LTZ8|Q95JH1|B2DCZ9|F1SIW2|Q28985|F1S279|A5A752|F1SQX0|F1RIP4|E3W6T5|P16611|Q6RVA9|F1RSI1|F1SEX1	http://amigo.geneontology.org/cgi-bin/amigo/term_details?term=GO:0051128
negative regulation of signaling	Gene Ontology	GO:0023057	16	276	0.0011918	0.0306152	F1S279|F1SJJ2|P79386|Q6EKW4|F1RYL4|F1RX31|F1ST92|F1RZV7|I3LC14|F1RPC1|P04088|Q6RVA9|F1RSI1|Q864Z2|Q9XSD9|I3LTZ8	http://amigo.geneontology.org/cgi-bin/amigo/term_details?term=GO:0023057
negative regulation of cell communication	Gene Ontology	GO:0010648	16	276	0.0011918	0.0306152	F1S279|F1SJJ2|P79386|Q6EKW4|F1RYL4|F1RX31|F1ST92|F1RZV7|I3LC14|F1RPC1|P04088|Q6RVA9|F1RSI1|Q864Z2|Q9XSD9|I3LTZ8	http://amigo.geneontology.org/cgi-bin/amigo/term_details?term=GO:0010648
cell migration	Gene Ontology	GO:0016477	16	276	0.0011918	0.0306152	F1S3B8|Q2HWD6|F1SIW2|Q95JH1|Q6EKW4|F1RF49|K7GPF5|F1RX31|I3L5T9|A7XNM3|F1S279|F1RYI8|I3LTZ8|A5A752|F1RSI1|F1SEX1	http://amigo.geneontology.org/cgi-bin/amigo/term_details?term=GO:0016477
regulation of locomotion	Gene Ontology	GO:0040012	12	173	0.00119255	0.0306152	F1SIW2|Q95JH1|Q6EKW4|F1RF49|F1RYI8|F1RX31|I3L5T9|A7XNM3|F1S279|I3LTZ8|A5A752|F1SEX1	http://amigo.geneontology.org/cgi-bin/amigo/term_details?term=GO:0040012
negative regulation of cell growth	Gene Ontology	GO:0030308	6	46	0.00119401	0.0306152	F1RYL4|F1RX31|F1SIW2|F1S279|F1SQX0|F1RSI1	http://amigo.geneontology.org/cgi-bin/amigo/term_details?term=GO:0030308
response to peptide hormone	Gene Ontology	GO:0043434	7	64	0.0012143	0.0308681	P24853|P16611|P04088|E3W6T5|Q28985|P49922|Q6RVA9	http://amigo.geneontology.org/cgi-bin/amigo/term_details?term=GO:0043434
positive regulation of T cell migration	Gene Ontology	GO:2000406	3	7	0.00129773	0.0324519	I3L5T9|Q95JH1|Q6EKW4	http://amigo.geneontology.org/cgi-bin/amigo/term_details?term=GO:2000406
animal organ development	Gene Ontology	GO:0048513	33	795	0.00130399	0.0324519	Q2HWD6|F1SJJ2|F1RS30|F1RF49|F1SJF5|A7XNM3|F1RSE2|Q0Q043|D0G6S5|F1RYL4|F1RX31|I3L5T9|I3LTZ8|J9JIL4|C7AI81|F1SCS2|F1RUD4|K7GMJ2|F1SIW2|F1S279|A5A752|F1SQ08|P24786|K7GPF5|P79386|F1SJ26|Q712P7|F1RYI8|F1ST92|I3LC14|Q6RVA9|F1RSI1|F1SEX1	http://amigo.geneontology.org/cgi-bin/amigo/term_details?term=GO:0048513
endoplasmic reticulum part	Gene Ontology	GO:0044432	13	201	0.00137138	0.0338446	P79381|F1S3P7|O46420|F1SJ26|Q8HXW0|F1RQU7|Q6RWA7|P27594|B0FPB3|Q6RVA9|Q1W675|C7S800|Q6UGB2	http://amigo.geneontology.org/cgi-bin/amigo/term_details?term=GO:0044432
membrane depolarization	Gene Ontology	GO:0051899	4	18	0.0014658	0.0352925	Q6RVA9|F1RZV7|F1SAL3|F1SAL2	http://amigo.geneontology.org/cgi-bin/amigo/term_details?term=GO:0051899
transmembrane receptor protein tyrosine kinase activity	Gene Ontology	GO:0004714	4	18	0.0014658	0.0352925	P24786|Q2HWD6|F1S3B8|D3K5K5	http://amigo.geneontology.org/cgi-bin/amigo/term_details?term=GO:0004714
NADP binding	Gene Ontology	GO:0050661	4	18	0.0014658	0.0352925	Q1W675|F1SGX4|C7S800|F1RPC8	http://amigo.geneontology.org/cgi-bin/amigo/term_details?term=GO:0050661
response to organonitrogen compound	Gene Ontology	GO:0010243	10	130	0.00148256	0.0353959	P24853|P16611|P04088|Q8HZK2|F1RYI8|B2DCZ9|E3W6T5|Q28985|P49922|Q6RVA9	http://amigo.geneontology.org/cgi-bin/amigo/term_details?term=GO:0010243
cell-cell signaling	Gene Ontology	GO:0007267	17	310	0.001494	0.0353959	F1RRX5|Q0Q043|P01214|F1S279|F1SUL7|P04088|Q28998|F1RYL4|F1RX31|F1ST92|I3L5T9|F1SAL3|A5A752|Q6RVA9|F1RSI1|F1SEX1|F1SHJ4	http://amigo.geneontology.org/cgi-bin/amigo/term_details?term=GO:0007267
regulation of cellular response to growth factor stimulus	Gene Ontology	GO:0090287	7	67	0.00155014	0.0361854	F1SJJ2|F1RX31|I3L5T9|I3LC14|I3LTZ8|Q6RVA9|F1SEX1	http://amigo.geneontology.org/cgi-bin/amigo/term_details?term=GO:0090287
positive regulation of cell adhesion	Gene Ontology	GO:0045785	8	87	0.00155177	0.0361854	P24853|Q95JH1|Q6EKW4|F1RF49|E3W6T5|I3L5T9|Q6RVA9|F1SEX1	http://amigo.geneontology.org/cgi-bin/amigo/term_details?term=GO:0045785
response to wounding	Gene Ontology	GO:0009611	9	109	0.00161337	0.0373281	F1S2H6|Q95JH1|F1RF49|F1RYI8|B2DCZ9|P29269|F1S279|Q6RVA9|F1SEX1	http://amigo.geneontology.org/cgi-bin/amigo/term_details?term=GO:0009611
connective tissue development	Gene Ontology	GO:0061448	7	68	0.00167685	0.0381509	C7AI81|F1SCS2|F1RYL4|F1RX31|A7XNM3|F1S279|F1SEX1	http://amigo.geneontology.org/cgi-bin/amigo/term_details?term=GO:0061448
regulation of blood circulation	Gene Ontology	GO:1903522	7	68	0.00167685	0.0381509	F1SAL2|A7XNM3|F1SAL3|A5A752|Q6RVA9|Q28998|D2WKD8	http://amigo.geneontology.org/cgi-bin/amigo/term_details?term=GO:1903522
monooxygenase activity	Gene Ontology	GO:0004497	5	33	0.00170046	0.0381509	F1SJ26|Q6UGB2|F1S3P7|A7L861|O46420	http://amigo.geneontology.org/cgi-bin/amigo/term_details?term=GO:0004497
alcohol biosynthetic process	Gene Ontology	GO:0046165	5	33	0.00170046	0.0381509	Q1W675|C7S800|P18648|O46420|I3LGJ8	http://amigo.geneontology.org/cgi-bin/amigo/term_details?term=GO:0046165
endoplasmic reticulum	Gene Ontology	GO:0005783	18	343	0.00173995	0.0384129	P79381|F1S3B8|F1S3P7|O46420|D0G6S5|F1SJ26|Q8HXW0|F1RQU7|C7S800|I3LEI1|Q6RWA7|P27594|B0FPB3|Q6RVA9|Q29095|Q1W675|F1RSE2|Q6UGB2	http://amigo.geneontology.org/cgi-bin/amigo/term_details?term=GO:0005783
positive regulation of lymphocyte migration	Gene Ontology	GO:2000403	3	8	0.00175409	0.0384129	I3L5T9|Q95JH1|Q6EKW4	http://amigo.geneontology.org/cgi-bin/amigo/term_details?term=GO:2000403
regulation of T cell migration	Gene Ontology	GO:2000404	3	8	0.00175409	0.0384129	I3L5T9|Q95JH1|Q6EKW4	http://amigo.geneontology.org/cgi-bin/amigo/term_details?term=GO:2000404
oxidoreductase activity, acting on CH-OH group of donors	Gene Ontology	GO:0016614	6	50	0.00176403	0.0384129	F1SGX4|Q8HXW0|Q29073|A5GFY8|Q1W675|C7S800	http://amigo.geneontology.org/cgi-bin/amigo/term_details?term=GO:0016614
multicellular organism development	Gene Ontology	GO:0007275	44	1188	0.00184285	0.0398366	Q2HWD6|Q9BDY8|F1SJJ2|F1RS30|Q6EKW4|F1RF49|F1SJF5|A7XNM3|F1SIM8|F1SHP9|D3K5K5|C3VMK7|Q0Q043|F1SUL7|D0G6S5|F1RYL4|F1RX31|I3L5T9|I3LTZ8|J9JIL4|C7AI81|F1SCS2|Q95JH1|F1RUD4|Q8HZK2|K7GMJ2|F1SIW2|F1RSE2|F1S279|A5A752|F1SQ08|P18648|P24786|K7GPF5|P79386|F1SJ26|Q712P7|F1RYI8|F1ST92|I3LC14|I3LAA3|Q6RVA9|F1RSI1|F1SEX1	http://amigo.geneontology.org/cgi-bin/amigo/term_details?term=GO:0007275
cellular response to endogenous stimulus	Gene Ontology	GO:0071495	17	317	0.00187391	0.0402144	F1S3B8|F1SJJ2|P79386|Q95JH1|P04088|F2Z592|F1RYI8|B2DCZ9|F1RX31|I3L5T9|P49922|I3LC14|I3LTZ8|Q6RVA9|F1SEX1|F1RSE2|D2WKD8	http://amigo.geneontology.org/cgi-bin/amigo/term_details?term=GO:0071495
anatomical structure development	Gene Ontology	GO:0048856	49	1368	0.00192696	0.0409164	Q2HWD6|F1SJS8|Q9BDY8|F1SJJ2|F1RS30|Q6EKW4|F1RF49|F1SJF5|A7XNM3|F1SIM8|F1SHP9|D3K5K5|P18648|Q0Q043|F1SUL7|D0G6S5|F1RYL4|F1RX31|I3L5T9|C3VMK7|F1RJ25|F1RUD4|J9JIL4|C7AI81|F1SCS2|Q95JH1|P04088|Q8HZK2|B2DCZ9|K7GMJ2|I3LTZ8|F1SIW2|F1RSE2|F1S279|A5A752|F1SQ08|P24786|K7GPF5|P79386|P16611|F1SJ26|Q712P7|F1RYI8|F1ST92|I3LC14|I3LAA3|Q6RVA9|F1RSI1|F1SEX1	http://amigo.geneontology.org/cgi-bin/amigo/term_details?term=GO:0048856
cartilage development	Gene Ontology	GO:0051216	6	51	0.00193425	0.0409164	F1SCS2|F1RYL4|F1RX31|A7XNM3|F1S279|F1SEX1	http://amigo.geneontology.org/cgi-bin/amigo/term_details?term=GO:0051216
single-organism developmental process	Gene Ontology	GO:0044767	51	1441	0.00196014	0.0411699	Q2HWD6|F1SJS8|Q9BDY8|F1SJJ2|F1RS30|Q6EKW4|F1RF49|F1SJF5|A7XNM3|F1SIM8|F1SHP9|D3K5K5|P18648|F1SEN4|Q0Q043|F1SUL7|D0G6S5|F1RYL4|F1RX31|I3L5T9|F1SFS3|C3VMK7|F1RJ25|F1RUD4|J9JIL4|C7AI81|F1SCS2|Q95JH1|P04088|Q8HZK2|B2DCZ9|K7GMJ2|I3LTZ8|F1SIW2|F1RSE2|F1S279|A5A752|F1SQ08|P24786|K7GPF5|P79386|P16611|F1SJ26|Q712P7|F1RYI8|F1ST92|I3LC14|I3LAA3|Q6RVA9|F1RSI1|F1SEX1	http://amigo.geneontology.org/cgi-bin/amigo/term_details?term=GO:0044767
movement of cell or subcellular component	Gene Ontology	GO:0006928	19	377	0.00202524	0.0422377	F1S3B8|Q2HWD6|F1S279|F1SIW2|Q95JH1|Q6EKW4|F1RF49|K7GPF5|F1RX31|I3L5T9|A7XNM3|F1RYI8|F1SAL3|F1SAL2|I3LTZ8|Q6RVA9|F1RSI1|A5A752|F1SEX1	http://amigo.geneontology.org/cgi-bin/amigo/term_details?term=GO:0006928
lyase activity	Gene Ontology	GO:0016829	6	52	0.00211663	0.0438351	K7GN83|P46410|I3LEI1|F1RJ25|Q5S1S4|F1RXC1	http://amigo.geneontology.org/cgi-bin/amigo/term_details?term=GO:0016829
regulation of cell communication	Gene Ontology	GO:0010646	31	756	0.00222379	0.0457344	F1S3B8|Q2HWD6|F1SJJ2|P24853|Q6EKW4|F1RYL4|F1RPC1|Q864Z2|F1SMQ2|Q28998|Q0Q043|F1SA94|F1RX31|F1RZV7|I3LTZ8|P04088|B2DCZ9|Q28985|F1RSE2|F1S279|A5A752|P79386|E3W6T5|P16611|Q9XSD9|F1RYI8|F1ST92|I3LC14|Q6RVA9|F1RSI1|F1SEX1	http://amigo.geneontology.org/cgi-bin/amigo/term_details?term=GO:0010646
mesenchyme development	Gene Ontology	GO:0060485	7	72	0.00226614	0.0461621	C7AI81|F1RYL4|F1RX31|F1SIW2|I3LTZ8|A5A752|F1RSE2	http://amigo.geneontology.org/cgi-bin/amigo/term_details?term=GO:0060485
regulation of heart rate by cardiac conduction	Gene Ontology	GO:0086091	3	9	0.00229914	0.0461621	Q6RVA9|F1SAL3|F1SAL2	http://amigo.geneontology.org/cgi-bin/amigo/term_details?term=GO:0086091
neuron projection terminus	Gene Ontology	GO:0044306	3	9	0.00229914	0.0461621	K7GMJ2|P01214|F1S153	http://amigo.geneontology.org/cgi-bin/amigo/term_details?term=GO:0044306
actin-mediated cell contraction	Gene Ontology	GO:0070252	4	21	0.00240108	0.0475639	Q6RVA9|A7XNM3|F1SAL3|F1SAL2	http://amigo.geneontology.org/cgi-bin/amigo/term_details?term=GO:0070252
icosanoid metabolic process	Gene Ontology	GO:0006690	4	21	0.00240108	0.0475639	I3LEI1|Q29073|F1RF49|Q29095	http://amigo.geneontology.org/cgi-bin/amigo/term_details?term=GO:0006690
mesenchymal cell differentiation	Gene Ontology	GO:0048762	6	54	0.00252003	0.0494122	F1RYL4|F1RX31|F1SIW2|I3LTZ8|A5A752|F1RSE2	http://amigo.geneontology.org/cgi-bin/amigo/term_details?term=GO:0048762
growth	Gene Ontology	GO:0040007	14	243	0.00253068	0.0494122	P24853|P16611|P04088|F1RF49|F1RYL4|F1RX31|E3W6T5|F1SIW2|Q28985|A7XNM3|F1S279|F1SQX0|F1RSI1|F1SEX1	http://amigo.geneontology.org/cgi-bin/amigo/term_details?term=GO:0040007
regulation of signaling	Gene Ontology	GO:0023051	31	763	0.00255015	0.0494122	F1S3B8|Q2HWD6|F1SJJ2|P24853|Q6EKW4|F1RYL4|F1RPC1|Q864Z2|F1SMQ2|Q28998|Q0Q043|F1SA94|F1RX31|F1RZV7|I3LTZ8|P04088|B2DCZ9|Q28985|F1RSE2|F1S279|A5A752|P79386|E3W6T5|P16611|Q9XSD9|F1RYI8|F1ST92|I3LC14|Q6RVA9|F1RSI1|F1SEX1	http://amigo.geneontology.org/cgi-bin/amigo/term_details?term=GO:0023051
cell motility	Gene Ontology	GO:0048870	16	299	0.00259105	0.0494122	F1S3B8|Q2HWD6|F1SIW2|Q95JH1|Q6EKW4|F1RF49|K7GPF5|F1RX31|I3L5T9|A7XNM3|F1S279|F1RYI8|I3LTZ8|A5A752|F1RSI1|F1SEX1	http://amigo.geneontology.org/cgi-bin/amigo/term_details?term=GO:0048870
localization of cell	Gene Ontology	GO:0051674	16	299	0.00259105	0.0494122	F1S3B8|Q2HWD6|F1SIW2|Q95JH1|Q6EKW4|F1RF49|K7GPF5|F1RX31|I3L5T9|A7XNM3|F1S279|F1RYI8|I3LTZ8|A5A752|F1RSI1|F1SEX1	http://amigo.geneontology.org/cgi-bin/amigo/term_details?term=GO:0051674
peptidyl-tyrosine phosphorylation	Gene Ontology	GO:0018108	8	95	0.0025945	0.0494122	P24786|Q2HWD6|F1S3B8|Q95JH1|B2DCZ9|F1RX31|D3K5K5|Q6RVA9	http://amigo.geneontology.org/cgi-bin/amigo/term_details?term=GO:0018108
