# Supplementary material for: Global Transcriptome Profiling of Multiple Porcine Organs Reveals Toxoplasma gondii-Induced Transcriptional Landscapes
Source: Front Immunol. 2019 Jul 3;10:1531. doi: 10.3389/fimmu.2019.01531 (PMC6618905; doi:10.3389/fimmu.2019.01531)
Supplement: Supplementary Table 5 — Significantly enriched GO terms and pathways of DETs in the higher expression cluster in most infected tissues. [file Table_5.XLSX]

## Sheet: higher in most infected tissues
##Databases: KEGG PATHWAY, Gene Ontology
##Statistical test method: hypergeometric test / Fisher's exact test
##FDR correction method: Benjamini and Hochberg
KEGG pathways
#Term	Database	KEGG ID	Input number	Background number	P-Value	Corrected P-Value	Input protein ID	Hyperlink
Herpes simplex infection	KEGG PATHWAY	ssc05168	26	140	1.31756e-19	6.22678e-16	B3GDZ4|Q56VQ1|M4M653|A0ZVR0|Q9TSW6|P17803|P01025|P42831|Q8HX73|Q8MHT9|Q8MHH2|Q95253|A1YH77|O77736|O97930|A5D9K5|Q9BEA4|B1H0V9|Q7YQ90|P23563|A5D9J7|A5D9L3|A5D9J3|A0A140TAJ8|Q764M5|A5H025	http://www.genome.jp/kegg-bin/show_pathway?ssc05168/ssc:100153387%09red/ssc:100153386%09red/ssc:100520621%09red/ssc:595128%09red/ssc:493186%09red/ssc:100157996%09red/ssc:445528%09red/ssc:100135029%09red/ssc:100037293%09red/ssc:396826%09red/ssc:106504372%09red/ssc:396991%09red/ssc:397086%09red/ssc:100048946%09red/ssc:100135050%09red/ssc:397072%09red/ssc:100037289%09red/ssc:100037288%09red/ssc:3974…
Antigen processing and presentation	KEGG PATHWAY	ssc04612	16	58	1.05505e-14	2.49308e-11	Q9TSW6|P17803|Q9BEA4|P23563|Q7YQ90|A5D9K5|Q8MHT9|A5D9J7|A5D9L3|Q8HX73|A5D9J3|Q64L94|A1YH77|Q8MHH2|Q863Z0|B3SP85	http://www.genome.jp/kegg-bin/show_pathway?ssc04612/ssc:100157996%09red/ssc:106504372%09red/ssc:445528%09red/ssc:100153387%09red/ssc:100135029%09red/ssc:100037288%09red/ssc:100153386%09red/ssc:100037293%09red/ssc:397086%09red/ssc:733650%09red/ssc:397522%09red/ssc:396991%09red/ssc:100520621%09red/ssc:397572%09red/ssc:100174943%09red/ssc:100135050%09red
Rheumatoid arthritis	KEGG PATHWAY	ssc05323	17	82	8.59854e-14	1.35456e-10	P17803|Q9BEA4|Q9MZU5|P42831|O97930|A5D9K5|A0MTC9|P23563|Q8MHH2|B3GDZ4|A5D9L3|Q8HX73|M4M653|A0A140TAJ8|Q95253|Q7YQ90|Q9N186	http://www.genome.jp/kegg-bin/show_pathway?ssc05323/ssc:100157996%09red/ssc:106504372%09red/ssc:445528%09red/ssc:100153387%09red/ssc:100144486%09red/ssc:100153386%09red/ssc:100038026%09red/ssc:397422%09red/ssc:397086%09red/ssc:396991%09red/ssc:396750%09red/ssc:100135050%09red/ssc:397286%09red/ssc:397683%09red
Allograft rejection	KEGG PATHWAY	ssc05330	13	42	1.09133e-12	6.44704e-10	Q8SQ34|P17803|Q9BEA4|O77736|Q8HX73|A5D9K5|Q8MHT9|Q8MHH2|A5D9L3|Q9TSW6|A1YH77|Q7YQ90|P23563	http://www.genome.jp/kegg-bin/show_pathway?ssc05330/ssc:100157996%09red/ssc:106504372%09red/ssc:445528%09red/ssc:100153387%09red/ssc:100135029%09red/ssc:100037288%09red/ssc:100153386%09red/ssc:100037293%09red/ssc:397086%09red/ssc:397395%09red/ssc:396991%09red/ssc:396826%09red/ssc:100135050%09red
Staphylococcus aureus infection	KEGG PATHWAY	ssc05150	13	45	2.28313e-12	1.1989e-09	Q8MHH2|P01025|Q9BEA4|Q9MZU5|F1STZ3|F1STZ1|Q69DL0|A5D9K5|Q7YQ90|I3LQ14|A5D9L3|A5PF02|Q8HX73	http://www.genome.jp/kegg-bin/show_pathway?ssc05150/ssc:100157996%09red/ssc:100625728%09red/ssc:106504372%09red/ssc:445528%09red/ssc:100153387%09red/ssc:397072%09red/ssc:448981%09red/ssc:100739136%09red/ssc:445460%09red/ssc:445461%09red/ssc:100153386%09red/ssc:396750%09red/ssc:100135050%09red
Graft-versus-host disease	KEGG PATHWAY	ssc05332	12	38	6.92218e-12	3.27142e-09	Q9TSW6|P17803|Q9BEA4|O77736|A5D9K5|Q8MHT9|Q8MHH2|A5D9L3|Q8HX73|A1YH77|Q7YQ90|P23563	http://www.genome.jp/kegg-bin/show_pathway?ssc05332/ssc:100157996%09red/ssc:106504372%09red/ssc:445528%09red/ssc:100153387%09red/ssc:100135029%09red/ssc:100037288%09red/ssc:100153386%09red/ssc:100037293%09red/ssc:397086%09red/ssc:396991%09red/ssc:396826%09red/ssc:100135050%09red
Systemic lupus erythematosus	KEGG PATHWAY	ssc05322	15	80	9.61484e-12	4.13089e-09	Q8SQ34|P17803|P01025|Q9BEA4|F2Z575|F1STZ3|F1STZ1|Q69DL0|A5D9K5|P23563|Q8MHH2|A5D9L3|Q8HX73|A5PF02|Q7YQ90	http://www.genome.jp/kegg-bin/show_pathway?ssc05322/ssc:100157996%09red/ssc:106504372%09red/ssc:445528%09red/ssc:100153387%09red/ssc:397072%09red/ssc:448981%09red/ssc:100739136%09red/ssc:445461%09red/ssc:397395%09red/ssc:397086%09red/ssc:100153386%09red/ssc:396991%09red/ssc:100158121%09red/ssc:445460%09red/ssc:100135050%09red
Influenza A	KEGG PATHWAY	ssc05164	18	136	1.38664e-11	5.46107e-09	P17803|A5H025|Q9BEA4|O77736|B1H0V9|Q9MZU5|P42831|Q7YQ90|Q56VQ1|A5D9K5|P23563|Q8MHH2|B3GDZ4|A5D9L3|Q8HX73|Q9N2I1|A0ZVR0|Q764M5	http://www.genome.jp/kegg-bin/show_pathway?ssc05164/ssc:100157996%09red/ssc:106504372%09red/ssc:445528%09red/ssc:100153387%09red/ssc:100153386%09red/ssc:100037289%09red/ssc:100048946%09red/ssc:397422%09red/ssc:397086%09red/ssc:397319%09red/ssc:396991%09red/ssc:396750%09red/ssc:595128%09red/ssc:396655%09red/ssc:493186%09red/ssc:396826%09red/ssc:100135050%09red
Type I diabetes mellitus	KEGG PATHWAY	ssc04940	12	43	2.34535e-11	8.52625e-09	Q9TSW6|P17803|Q9BEA4|O77736|A5D9K5|Q8MHT9|Q8MHH2|A5D9L3|Q8HX73|A1YH77|Q7YQ90|P23563	http://www.genome.jp/kegg-bin/show_pathway?ssc04940/ssc:100157996%09red/ssc:106504372%09red/ssc:445528%09red/ssc:100153387%09red/ssc:100135029%09red/ssc:100037288%09red/ssc:100153386%09red/ssc:100037293%09red/ssc:397086%09red/ssc:396991%09red/ssc:396826%09red/ssc:100135050%09red
Cell adhesion molecules (CAMs)	KEGG PATHWAY	ssc04514	15	91	4.90439e-11	1.65558e-08	Q8SQ34|Q9TSW6|Q9BEA4|Q9MZU5|Q7YQ90|A5D9K5|Q8MHT9|Q8MHH2|A5D9L3|Q8HX73|A1YH77|Q9N186|A8R080|Q4QTK1|C3VML0	http://www.genome.jp/kegg-bin/show_pathway?ssc04514/ssc:100157996%09red/ssc:733578%09red/ssc:106504372%09red/ssc:445528%09red/ssc:100153387%09red/ssc:100135029%09red/ssc:100037288%09red/ssc:100153386%09red/ssc:100037293%09red/ssc:574058%09red/ssc:100127147%09red/ssc:397395%09red/ssc:396750%09red/ssc:397286%09red/ssc:100135050%09red
Autoimmune thyroid disease	KEGG PATHWAY	ssc05320	12	52	1.56317e-10	4.92472e-08	Q8SQ34|Q9TSW6|Q9BEA4|O77736|Q9N186|A5D9K5|Q8MHT9|Q8MHH2|A5D9L3|Q8HX73|A1YH77|Q7YQ90	http://www.genome.jp/kegg-bin/show_pathway?ssc05320/ssc:100157996%09red/ssc:106504372%09red/ssc:445528%09red/ssc:100153387%09red/ssc:100135029%09red/ssc:100037288%09red/ssc:100153386%09red/ssc:100037293%09red/ssc:397395%09red/ssc:396826%09red/ssc:397286%09red/ssc:100135050%09red
Inflammatory bowel disease (IBD)	KEGG PATHWAY	ssc05321	13	68	2.0193e-10	5.09926e-08	P17803|Q9BEA4|Q7YQ90|Q19S50|A5D9K5|P23563|Q8MHH2|Q8SQ71|A5D9L3|Q8HX73|Q764M5|Q863Z5|E7CR02	http://www.genome.jp/kegg-bin/show_pathway?ssc05321/ssc:100157996%09red/ssc:106504372%09red/ssc:445528%09red/ssc:100153387%09red/ssc:733648%09red/ssc:397156%09red/ssc:100153386%09red/ssc:397086%09red/ssc:396991%09red/ssc:396655%09red/ssc:397614%09red/ssc:100135050%09red
Toxoplasmosis	KEGG PATHWAY	ssc05145	14	85	2.26586e-10	5.09926e-08	Q8SQ34|P17803|Q9BEA4|E7CR04|Q19S50|A5D9K5|P23563|Q8MHH2|A5D9L3|Q8HX73|A7BG67|Q764M5|Q7YQ90|E7CR02	http://www.genome.jp/kegg-bin/show_pathway?ssc05145/ssc:100157996%09red/ssc:106504372%09red/ssc:445528%09red/ssc:100153387%09red/ssc:100153386%09red/ssc:733648%09red/ssc:397395%09red/ssc:397086%09red/ssc:100125555%09red/ssc:100307052%09red/ssc:396991%09red/ssc:396655%09red/ssc:100135050%09red
Viral myocarditis	KEGG PATHWAY	ssc05416	11	45	5.54478e-10	1.19112e-07	Q8SQ34|Q9TSW6|Q9BEA4|Q9MZU5|A5D9K5|Q8MHT9|Q8MHH2|A5D9L3|Q8HX73|A1YH77|Q7YQ90	http://www.genome.jp/kegg-bin/show_pathway?ssc05416/ssc:100157996%09red/ssc:106504372%09red/ssc:445528%09red/ssc:100153387%09red/ssc:100135029%09red/ssc:100037288%09red/ssc:100153386%09red/ssc:100037293%09red/ssc:397395%09red/ssc:396750%09red/ssc:100135050%09red
Pertussis	KEGG PATHWAY	ssc05133	13	78	9.06601e-10	1.86287e-07	P01025|A0FIN4|O97930|F1STZ3|F1STZ1|Q69DL0|Q6T5D3|P23563|D2KC06|A7BG67|A5PF02|A0A140TAJ8|Q9N2I1	http://www.genome.jp/kegg-bin/show_pathway?ssc05133/ssc:100125555%09red/ssc:396645%09red/ssc:448981%09red/ssc:100739136%09red/ssc:396611%09red/ssc:445460%09red/ssc:445461%09red/ssc:397086%09red/ssc:397319%09red/ssc:100144486%09red/ssc:397072%09red
Leishmaniasis	KEGG PATHWAY	ssc05140	12	64	1.2647e-09	2.4904e-07	P17803|P01025|Q9BEA4|O97930|A5D9K5|P23563|Q8MHH2|A5D9L3|Q8HX73|A0A140TAJ8|Q764M5|Q7YQ90	http://www.genome.jp/kegg-bin/show_pathway?ssc05140/ssc:100157996%09red/ssc:106504372%09red/ssc:445528%09red/ssc:100153387%09red/ssc:396991%09red/ssc:100153386%09red/ssc:397086%09red/ssc:100144486%09red/ssc:397072%09red/ssc:396655%09red/ssc:100135050%09red
HTLV-I infection	KEGG PATHWAY	ssc05166	17	163	1.56207e-09	2.95295e-07	Q8SQ34|Q9TSW6|Q9BEA4|A0A140TAJ8|Q9MZU5|O97930|A5D9K5|Q8MHT9|Q8MHH2|Q8SQ71|A5D9L3|Q8HX73|M4M653|A1YH77|Q95253|Q7YQ90|P23563	http://www.genome.jp/kegg-bin/show_pathway?ssc05166/ssc:100157996%09red/ssc:106504372%09red/ssc:445528%09red/ssc:100153387%09red/ssc:100135029%09red/ssc:397156%09red/ssc:100037288%09red/ssc:100153386%09red/ssc:100037293%09red/ssc:397086%09red/ssc:397395%09red/ssc:100144486%09red/ssc:396750%09red/ssc:100135050%09red/ssc:397683%09red
Asthma	KEGG PATHWAY	ssc05310	9	28	2.88418e-09	4.86808e-07	Q8SQ34|Q9BEA4|A5D9K5|P23563|Q8MHH2|A5D9L3|Q8HX73|G8XRI2|Q7YQ90	http://www.genome.jp/kegg-bin/show_pathway?ssc05310/ssc:100157996%09red/ssc:106504372%09red/ssc:445528%09red/ssc:100153387%09red/ssc:100153386%09red/ssc:100038010%09red/ssc:397395%09red/ssc:397086%09red/ssc:100135050%09red
Intestinal immune network for IgA production	KEGG PATHWAY	ssc04672	10	47	1.11229e-08	1.42072e-06	Q8SQ34|Q9BEA4|A5D9K5|A0MTC9|Q7YQ90|Q8MHH2|Q95253|A5D9L3|M4M653|Q8HX73	http://www.genome.jp/kegg-bin/show_pathway?ssc04672/ssc:100157996%09red/ssc:106504372%09red/ssc:445528%09red/ssc:100153387%09red/ssc:100153386%09red/ssc:397395%09red/ssc:100038026%09red/ssc:100135050%09red/ssc:397683%09red
Phagosome	KEGG PATHWAY	ssc04145	13	114	5.65254e-08	5.95216e-06	Q9TSW6|Q8MHH2|P01025|Q9BEA4|F1SEU0|A5D9K5|Q8MHT9|A5D9J7|A5D9L3|Q8HX73|A5D9J3|A1YH77|Q7YQ90	http://www.genome.jp/kegg-bin/show_pathway?ssc04145/ssc:100157996%09red/ssc:106504372%09red/ssc:445528%09red/ssc:100153387%09red/ssc:397072%09red/ssc:100037288%09red/ssc:100153386%09red/ssc:100037293%09red/ssc:733650%09red/ssc:100135029%09red/ssc:100511665%09red/ssc:100520621%09red/ssc:100135050%09red
Cytokine-cytokine receptor interaction	KEGG PATHWAY	ssc04060	16	185	5.66752e-08	5.95216e-06	Q8SQ34|P17803|Q6YST0|C7F842|O77736|B0FYK2|Q8SQ71|P42831|P23563|A0MTC9|B3GDZ4|Q711P4|G8XRI2|M4M653|Q95253|Q863Z5	http://www.genome.jp/kegg-bin/show_pathway?ssc04060/ssc:100302703%09red/ssc:397156%09red/ssc:100038010%09red/ssc:414374%09red/ssc:100038026%09red/ssc:397422%09red/ssc:397395%09red/ssc:397086%09red/ssc:396668%09red/ssc:396991%09red/ssc:100135681%09red/ssc:397614%09red/ssc:396826%09red/ssc:397683%09red
Prolactin signaling pathway	KEGG PATHWAY	ssc04917	10	59	7.50328e-08	7.7088e-06	A0FIN4|B1H0V9|O97930|E7CR04|Q19S50|E7CR02|D2KC06|A0A140TAJ8|Q764M5|K9IVI9	http://www.genome.jp/kegg-bin/show_pathway?ssc04917/ssc:733648%09red/ssc:396611%09red/ssc:100307052%09red/ssc:100518866%09red/ssc:100144486%09red/ssc:396655%09red/ssc:493186%09red
TNF signaling pathway	KEGG PATHWAY	ssc04668	11	84	1.7576e-07	1.62871e-05	Q95253|O77736|B1H0V9|Q9MZU5|P42831|O97930|P23563|B3GDZ4|M4M653|A0A140TAJ8|G9M4N0	http://www.genome.jp/kegg-bin/show_pathway?ssc04668/ssc:100738193%09red/ssc:397422%09red/ssc:397086%09red/ssc:100144486%09red/ssc:396750%09red/ssc:493186%09red/ssc:396826%09red/ssc:397683%09red
Chagas disease (American trypanosomiasis)	KEGG PATHWAY	ssc05142	11	95	5.42922e-07	3.7733e-05	P17803|P01025|O77736|O97930|P42831|F1STZ3|F1STZ1|Q69DL0|P23563|B3GDZ4|A0A140TAJ8	http://www.genome.jp/kegg-bin/show_pathway?ssc05142/ssc:396991%09red/ssc:100739136%09red/ssc:397422%09red/ssc:445461%09red/ssc:397086%09red/ssc:445460%09red/ssc:100144486%09red/ssc:396826%09red/ssc:397072%09red
Hepatitis C	KEGG PATHWAY	ssc05160	11	106	1.47022e-06	8.37141e-05	A5H025|A0FIN4|B1H0V9|Q56VQ1|Q19S50|P23563|E7CR02|D2KC06|Q764M5|A0ZVR0|C3VML0	http://www.genome.jp/kegg-bin/show_pathway?ssc05160/ssc:733578%09red/ssc:100048946%09red/ssc:733648%09red/ssc:100037289%09red/ssc:396611%09red/ssc:397086%09red/ssc:396655%09red/ssc:595128%09red/ssc:493186%09red
Chemokine signaling pathway	KEGG PATHWAY	ssc04062	11	112	2.41684e-06	0.000118979	Q6YST0|C7F842|B0FYK2|P42831|Q19S50|B3VFB5|E7CR02|B3GDZ4|Q711P4|G8XRI2|Q764M5	http://www.genome.jp/kegg-bin/show_pathway?ssc04062/ssc:100302703%09red/ssc:733648%09red/ssc:100038010%09red/ssc:414374%09red/ssc:397422%09red/ssc:396668%09red/ssc:100153155%09red/ssc:396655%09red/ssc:100135681%09red
Jak-STAT signaling pathway	KEGG PATHWAY	ssc04630	11	128	7.96934e-06	0.000301305	P17803|B1H0V9|Q95253|E7CR04|Q19S50|E7CR02|Q8SQ71|M4M653|Q764M5|Q863Z5|K9IVI9	http://www.genome.jp/kegg-bin/show_pathway?ssc04630/ssc:733648%09red/ssc:397156%09red/ssc:100307052%09red/ssc:100518866%09red/ssc:396991%09red/ssc:396655%09red/ssc:397683%09red/ssc:493186%09red/ssc:397614%09red
Toll-like receptor signaling pathway	KEGG PATHWAY	ssc04620	9	94	2.49364e-05	0.000715382	Q8SQ34|O97930|B0FYK2|P23563|A7BG67|Q711P4|A0A140TAJ8|Q764M5|A0ZVR0	http://www.genome.jp/kegg-bin/show_pathway?ssc04620/ssc:100125555%09red/ssc:100037289%09red/ssc:397395%09red/ssc:397086%09red/ssc:396668%09red/ssc:100144486%09red/ssc:396655%09red/ssc:100135681%09red
Proteasome	KEGG PATHWAY	ssc03050	6	34	2.77597e-05	0.000776287	P17803|Q1W2K3|A5D9J4|Q2PYM7|Q64L94|Q863Z0	http://www.genome.jp/kegg-bin/show_pathway?ssc03050/ssc:100153464%09red/ssc:733626%09red/ssc:654294%09red/ssc:396991%09red/ssc:397522%09red/ssc:397572%09red
Tuberculosis	KEGG PATHWAY	ssc05152	10	133	6.07797e-05	0.00137933	P17803|P01025|Q9BEA4|A5D9K5|P23563|Q8MHH2|A5D9L3|Q8HX73|Q764M5|Q7YQ90	http://www.genome.jp/kegg-bin/show_pathway?ssc05152/ssc:100157996%09red/ssc:106504372%09red/ssc:445528%09red/ssc:100153387%09red/ssc:397072%09red/ssc:100153386%09red/ssc:397086%09red/ssc:396991%09red/ssc:396655%09red/ssc:100135050%09red
Primary immunodeficiency	KEGG PATHWAY	ssc05340	5	25	7.92377e-05	0.00160573	A5D9J7|A5D9J3|Q8SQ34|F1SBG3|Q8SQ71	http://www.genome.jp/kegg-bin/show_pathway?ssc05340/ssc:100520621%09red/ssc:397395%09red/ssc:733650%09red/ssc:397156%09red/ssc:100152350%09red
Osteoclast differentiation	KEGG PATHWAY	ssc04380	8	89	0.000107684	0.00201951	P17803|B1H0V9|O97930|E7CR04|P23563|A0A140TAJ8|Q764M5|F1SBG3	http://www.genome.jp/kegg-bin/show_pathway?ssc04380/ssc:396991%09red/ssc:397086%09red/ssc:100307052%09red/ssc:100144486%09red/ssc:396655%09red/ssc:493186%09red/ssc:100152350%09red
AGE-RAGE signaling pathway in diabetic complications	KEGG PATHWAY	ssc04933	7	68	0.000135034	0.00228735	Q9MZU5|P42831|Q19S50|P23563|E7CR02|B3GDZ4|Q764M5	http://www.genome.jp/kegg-bin/show_pathway?ssc04933/ssc:396750%09red/ssc:397422%09red/ssc:397086%09red/ssc:733648%09red/ssc:396655%09red
NF-kappa B signaling pathway	KEGG PATHWAY	ssc04064	7	73	0.00020293	0.00308441	Q8SQ34|Q9MZU5|P23563|A0MTC9|A7BG67|Q711P4|F1SBG3	http://www.genome.jp/kegg-bin/show_pathway?ssc04064/ssc:100125555%09red/ssc:397395%09red/ssc:100038026%09red/ssc:397086%09red/ssc:396668%09red/ssc:396750%09red/ssc:100152350%09red
Malaria	KEGG PATHWAY	ssc05144	6	54	0.000282308	0.00384492	Q8SQ34|P17803|Q9MZU5|P42831|P23563|B3GDZ4	http://www.genome.jp/kegg-bin/show_pathway?ssc05144/ssc:396750%09red/ssc:397422%09red/ssc:397086%09red/ssc:396991%09red/ssc:397395%09red
Measles	KEGG PATHWAY	ssc05162	8	114	0.000522262	0.00584884	P17803|O77736|Q56VQ1|Q19S50|E7CR02|Q8SQ71|Q764M5|A0ZVR0	http://www.genome.jp/kegg-bin/show_pathway?ssc05162/ssc:397156%09red/ssc:733648%09red/ssc:100037289%09red/ssc:396991%09red/ssc:396655%09red/ssc:595128%09red/ssc:396826%09red
Hepatitis B	KEGG PATHWAY	ssc05161	8	118	0.000647503	0.00681536	O77736|O97930|Q19S50|P23563|E7CR02|A0A140TAJ8|Q764M5|A0ZVR0	http://www.genome.jp/kegg-bin/show_pathway?ssc05161/ssc:733648%09red/ssc:100037289%09red/ssc:397086%09red/ssc:100144486%09red/ssc:396655%09red/ssc:396826%09red
Complement and coagulation cascades	KEGG PATHWAY	ssc04610	6	65	0.000704614	0.00717808	P01025|F1STZ3|F1STZ1|Q69DL0|I3LQ14|A5PF02	http://www.genome.jp/kegg-bin/show_pathway?ssc04610/ssc:100625728%09red/ssc:397072%09red/ssc:448981%09red/ssc:100739136%09red/ssc:445460%09red/ssc:445461%09red
Epstein-Barr virus infection	KEGG PATHWAY	ssc05169	8	122	0.000795967	0.00791945	Q8SQ34|Q9TSW6|Q9MZU5|Q19S50|Q8MHT9|P17803|A1YH77|E7CR02	http://www.genome.jp/kegg-bin/show_pathway?ssc05169/ssc:733648%09red/ssc:100135029%09red/ssc:100037293%09red/ssc:397395%09red/ssc:396991%09red/ssc:100037288%09red/ssc:396750%09red
Type II diabetes mellitus	KEGG PATHWAY	ssc04930	4	27	0.00116998	0.0103935	E7CR04|B1H0V9|F1S3B7|P23563	http://www.genome.jp/kegg-bin/show_pathway?ssc04930/ssc:397086%09red/ssc:493186%09red/ssc:100307052%09red/ssc:100522855%09red
Viral carcinogenesis	KEGG PATHWAY	ssc05203	7	110	0.00199094	0.015782	Q9TSW6|P01025|Q19S50|Q8MHT9|A1YH77|A0ZVR0|E7CR02	http://www.genome.jp/kegg-bin/show_pathway?ssc05203/ssc:397072%09red/ssc:733648%09red/ssc:100135029%09red/ssc:100037293%09red/ssc:100037288%09red/ssc:100037289%09red
African trypanosomiasis	KEGG PATHWAY	ssc05143	4	32	0.00206551	0.0161082	P17803|O77736|P23563|Q9MZU5	http://www.genome.jp/kegg-bin/show_pathway?ssc05143/ssc:396750%09red/ssc:397086%09red/ssc:396826%09red/ssc:396991%09red
Salmonella infection	KEGG PATHWAY	ssc05132	5	58	0.0026179	0.0189467	P17803|Q9N2I1|Q711P4|A0A140TAJ8|O97930	http://www.genome.jp/kegg-bin/show_pathway?ssc05132/ssc:396668%09red/ssc:397319%09red/ssc:100144486%09red/ssc:396991%09red
B cell receptor signaling pathway	KEGG PATHWAY	ssc04662	4	41	0.00470258	0.0275054	A0A140TAJ8|F1SBG3|A2T1K6|O97930	http://www.genome.jp/kegg-bin/show_pathway?ssc04662/ssc:100144486%09red/ssc:100038011%09red/ssc:100152350%09red
NOD-like receptor signaling pathway	KEGG PATHWAY	ssc04621	4	43	0.00549975	0.0308126	P42831|B3GDZ4|Q9N2I1|P23563	http://www.genome.jp/kegg-bin/show_pathway?ssc04621/ssc:397422%09red/ssc:397319%09red/ssc:397086%09red
Natural killer cell mediated cytotoxicity	KEGG PATHWAY	ssc04650	5	71	0.00588294	0.0325785	P17803|K7GP18|O77736|P23563|Q9MZU5	http://www.genome.jp/kegg-bin/show_pathway?ssc04650/ssc:396750%09red/ssc:397086%09red/ssc:396826%09red/ssc:100153635%09red/ssc:396991%09red
T cell receptor signaling pathway	KEGG PATHWAY	ssc04660	5	77	0.00808415	0.038786	P17803|Q9N186|A0A140TAJ8|P23563|O97930	http://www.genome.jp/kegg-bin/show_pathway?ssc04660/ssc:397086%09red/ssc:100144486%09red/ssc:396991%09red/ssc:397286%09red
Cytosolic DNA-sensing pathway	KEGG PATHWAY	ssc04623	4	51	0.00958143	0.0427995	Q9N2I1|A0ZVR0|Q711P4|A5GFP5	http://www.genome.jp/kegg-bin/show_pathway?ssc04623/ssc:396668%09red/ssc:397319%09red/ssc:100144524%09red/ssc:100037289%09red
GO terms
#Term	Database	GO ID	Input number	Background number	P-Value	Corrected P-Value	Input protein ID	Hyperlink
immune response	Gene Ontology	GO:0006955	30	389	5.75e-13	5.44e-10	Q6YST0|B0FYK2|Q69DL0|A0MTC9|Q7YRL4|M4M653|A0ZVR0|P17803|P01025|A0FIN4|Q95253|P42831|D2KC06|B3GDZ4|Q711P4|Q4QTK1|Q8SQ34|C7F842|O77736|F1RTH8|A7BG67|F1RQD6|Q9BEA4|E7CR04|P23563|A5D9L3|Q66UW5|Q764M5|F1SBG3|Q5S1V9	http://amigo.geneontology.org/cgi-bin/amigo/term_details?term=GO:0006955
immune system process	Gene Ontology	GO:0002376	38	652	1.01e-12	6.45e-10	Q6YST0|B0FYK2|Q69DL0|A0MTC9|F1SUN4|Q7YRL4|M4M653|A0ZVR0|Q06AU8|P17803|P01025|A0FIN4|Q95253|P42831|F1STZ3|D2KC06|B3GDZ4|Q711P4|Q66UW5|A5D9J7|Q4QTK1|Q8SQ34|C7F842|O77736|F1RTH8|A7BG67|F1RQD6|B3SP85|Q9BEA4|E7CR04|P23563|I3LQ14|A5D9L3|A5D9J3|I3LV04|Q764M5|F1SBG3|Q5S1V9	http://amigo.geneontology.org/cgi-bin/amigo/term_details?term=GO:0002376
regulation of immune system process	Gene Ontology	GO:0002682	24	312	1.77e-10	4.92e-08	Q6YST0|B0FYK2|Q69DL0|F1SUN4|Q7YRL4|A0ZVR0|P17803|P01025|A0FIN4|P42831|F1STZ3|D2KC06|B3GDZ4|A5D9J7|Q4QTK1|Q8SQ34|F1RTH8|A7BG67|F1RQD6|E7CR04|P23563|I3LQ14|A5D9J3|Q5S1V9	http://amigo.geneontology.org/cgi-bin/amigo/term_details?term=GO:0002682
positive regulation of immune system process	Gene Ontology	GO:0002684	20	210	2.2e-10	5.1e-08	Q8SQ34|A5D9J7|P01025|Q6YST0|A0FIN4|B0FYK2|P17803|P42831|F1RTH8|Q69DL0|P23563|I3LQ14|B3GDZ4|A7BG67|Q7YRL4|A5D9J3|D2KC06|A0ZVR0|F1RQD6|Q4QTK1	http://amigo.geneontology.org/cgi-bin/amigo/term_details?term=GO:0002684
regulation of cytokine production	Gene Ontology	GO:0001817	16	144	2.12e-09	3.71e-07	Q8SQ34|F1SV36|D2KC06|A0FIN4|P17803|P42831|E7CR04|F1RTH8|P23563|I3LQ14|B3GDZ4|A7BG67|A0ZVR0|F1RQD6|Q4QTK1|Q5S1V9	http://amigo.geneontology.org/cgi-bin/amigo/term_details?term=GO:0001817
cytokine production	Gene Ontology	GO:0001816	16	158	7.23e-09	1.11e-06	Q8SQ34|F1SV36|D2KC06|A0FIN4|P17803|P42831|E7CR04|F1RTH8|P23563|I3LQ14|B3GDZ4|A7BG67|A0ZVR0|F1RQD6|Q4QTK1|Q5S1V9	http://amigo.geneontology.org/cgi-bin/amigo/term_details?term=GO:0001816
response to cytokine	Gene Ontology	GO:0034097	18	208	7.75e-09	1.11e-06	Q8SQ34|P17803|Q6YST0|A0FIN4|O77736|B0FYK2|P42831|E7CR04|Q19S50|Q863Z5|P23563|E7CR02|D2KC06|B3GDZ4|Q711P4|Q764M5|A0ZVR0|Q4QTK1	http://amigo.geneontology.org/cgi-bin/amigo/term_details?term=GO:0034097
defense response	Gene Ontology	GO:0006952	25	414	8e-09	1.11e-06	Q8MJ80|Q6YST0|B0FYK2|Q69DL0|Q7YRL4|Q863Z5|P17803|P01025|A0ZVR0|A0FIN4|P42831|D2KC06|B3GDZ4|Q711P4|Q8SQ34|O77736|A7BG67|F1RQD6|F1SV36|E7CR04|P23563|Q66UW5|I3LV04|Q764M5|Q5S1V9	http://amigo.geneontology.org/cgi-bin/amigo/term_details?term=GO:0006952
positive regulation of cytokine production	Gene Ontology	GO:0001819	13	98	1.1e-08	1.42e-06	Q8SQ34|F1SV36|D2KC06|A0FIN4|P17803|F1RTH8|P23563|I3LQ14|A7BG67|A0ZVR0|F1RQD6|Q4QTK1|Q5S1V9	http://amigo.geneontology.org/cgi-bin/amigo/term_details?term=GO:0001819
cytokine-mediated signaling pathway	Gene Ontology	GO:0019221	16	164	1.18e-08	1.43e-06	Q8SQ34|Q6YST0|A0FIN4|O77736|B0FYK2|P42831|E7CR04|Q19S50|Q863Z5|P23563|E7CR02|D2KC06|B3GDZ4|Q711P4|Q764M5|A0ZVR0	http://amigo.geneontology.org/cgi-bin/amigo/term_details?term=GO:0019221
cellular response to cytokine stimulus	Gene Ontology	GO:0071345	17	190	1.32e-08	1.52e-06	Q8SQ34|P17803|Q6YST0|A0FIN4|O77736|B0FYK2|P42831|E7CR04|Q19S50|Q863Z5|P23563|E7CR02|D2KC06|B3GDZ4|Q711P4|Q764M5|A0ZVR0	http://amigo.geneontology.org/cgi-bin/amigo/term_details?term=GO:0071345
cellular response to interferon-gamma	Gene Ontology	GO:0071346	7	16	3.22e-08	3.54e-06	A0FIN4|P42831|E7CR04|D2KC06|B3GDZ4|Q711P4|Q764M5	http://amigo.geneontology.org/cgi-bin/amigo/term_details?term=GO:0071346
response to interferon-gamma	Gene Ontology	GO:0034341	7	20	1.11e-07	1.09e-05	A0FIN4|P42831|E7CR04|D2KC06|B3GDZ4|Q711P4|Q764M5	http://amigo.geneontology.org/cgi-bin/amigo/term_details?term=GO:0034341
response to lipopolysaccharide	Gene Ontology	GO:0032496	11	82	1.41e-07	1.33e-05	Q8SQ34|P17803|O77736|B0FYK2|P42831|P23563|B3GDZ4|A7BG67|Q7YRL4|O77741|F1RQD6	http://amigo.geneontology.org/cgi-bin/amigo/term_details?term=GO:0032496
regulation of immune response	Gene Ontology	GO:0050776	14	151	1.84e-07	1.64e-05	Q8SQ34|P17803|P01025|A0FIN4|E7CR04|F1RTH8|Q69DL0|P23563|D2KC06|A7BG67|Q7YRL4|A0ZVR0|F1RQD6|Q5S1V9	http://amigo.geneontology.org/cgi-bin/amigo/term_details?term=GO:0050776
response to molecule of bacterial origin	Gene Ontology	GO:0002237	11	85	1.96e-07	1.68e-05	Q8SQ34|P17803|O77736|B0FYK2|P42831|P23563|B3GDZ4|A7BG67|Q7YRL4|O77741|F1RQD6	http://amigo.geneontology.org/cgi-bin/amigo/term_details?term=GO:0002237
immune effector process	Gene Ontology	GO:0002252	16	210	2.87e-07	2.38e-05	Q8SQ34|P17803|P01025|A0FIN4|B0FYK2|P42831|F1RTH8|Q69DL0|P23563|D2KC06|B3GDZ4|Q7YRL4|Q66UW5|A0ZVR0|F1RQD6|Q5S1V9	http://amigo.geneontology.org/cgi-bin/amigo/term_details?term=GO:0002252
positive regulation of defense response	Gene Ontology	GO:0031349	10	70	3.15e-07	2.53e-05	A0FIN4|P42831|P23563|D2KC06|B3GDZ4|A7BG67|Q7YRL4|Q711P4|A0ZVR0|F1RQD6	http://amigo.geneontology.org/cgi-bin/amigo/term_details?term=GO:0031349
regulation of T cell activation	Gene Ontology	GO:0050863	10	72	3.99e-07	3.09e-05	P17803|A0FIN4|P42831|F1RTH8|F1SUN4|D2KC06|B3GDZ4|F1RQD6|Q4QTK1|Q5S1V9	http://amigo.geneontology.org/cgi-bin/amigo/term_details?term=GO:0050863
innate immune response	Gene Ontology	GO:0045087	15	192	5.15e-07	3.77e-05	P01025|A0FIN4|P42831|E7CR04|Q69DL0|D2KC06|B3GDZ4|A7BG67|Q7YRL4|Q711P4|Q66UW5|Q764M5|A0ZVR0|F1RQD6|Q5S1V9	http://amigo.geneontology.org/cgi-bin/amigo/term_details?term=GO:0045087
regulation of cell-cell adhesion	Gene Ontology	GO:0022407	11	95	5.43e-07	3.77e-05	P17803|A0FIN4|P42831|F1RTH8|P23563|F1SUN4|D2KC06|B3GDZ4|F1RQD6|Q4QTK1|Q5S1V9	http://amigo.geneontology.org/cgi-bin/amigo/term_details?term=GO:0022407
regulation of lymphocyte activation	Gene Ontology	GO:0051249	11	95	5.43e-07	3.77e-05	Q8SQ34|P17803|A0FIN4|P42831|F1RTH8|F1SUN4|D2KC06|B3GDZ4|F1RQD6|Q4QTK1|Q5S1V9	http://amigo.geneontology.org/cgi-bin/amigo/term_details?term=GO:0051249
regulation of leukocyte cell-cell adhesion	Gene Ontology	GO:1903037	10	76	6.28e-07	4.24e-05	P17803|A0FIN4|P42831|F1RTH8|F1SUN4|D2KC06|B3GDZ4|F1RQD6|Q4QTK1|Q5S1V9	http://amigo.geneontology.org/cgi-bin/amigo/term_details?term=GO:1903037
positive regulation of immune response	Gene Ontology	GO:0050778	12	120	6.9e-07	4.53e-05	Q8SQ34|P17803|P01025|A0FIN4|F1RTH8|Q69DL0|P23563|D2KC06|A7BG67|Q7YRL4|A0ZVR0|F1RQD6	http://amigo.geneontology.org/cgi-bin/amigo/term_details?term=GO:0050778
positive regulation of response to external stimulus	Gene Ontology	GO:0032103	10	81	1.07e-06	6.76e-05	Q6YST0|B0FYK2|P42831|P23563|I3LQ14|B3GDZ4|A7BG67|Q7YRL4|Q711P4|F1RQD6	http://amigo.geneontology.org/cgi-bin/amigo/term_details?term=GO:0032103
regulation of mononuclear cell proliferation	Gene Ontology	GO:0032944	9	62	1.12e-06	6.76e-05	Q8SQ34|P17803|A0FIN4|F1RTH8|F1SUN4|D2KC06|F1RQD6|Q4QTK1|Q5S1V9	http://amigo.geneontology.org/cgi-bin/amigo/term_details?term=GO:0032944
regulation of lymphocyte proliferation	Gene Ontology	GO:0050670	9	62	1.12e-06	6.76e-05	Q8SQ34|P17803|A0FIN4|F1RTH8|F1SUN4|D2KC06|F1RQD6|Q4QTK1|Q5S1V9	http://amigo.geneontology.org/cgi-bin/amigo/term_details?term=GO:0050670
regulation of leukocyte proliferation	Gene Ontology	GO:0070663	9	63	1.26e-06	7.44e-05	Q8SQ34|P17803|A0FIN4|F1RTH8|F1SUN4|D2KC06|F1RQD6|Q4QTK1|Q5S1V9	http://amigo.geneontology.org/cgi-bin/amigo/term_details?term=GO:0070663
positive regulation of response to stimulus	Gene Ontology	GO:0048584	24	509	1.32e-06	7.63e-05	Q6YST0|B0FYK2|Q69DL0|Q7YRL4|A0ZVR0|P17803|P01025|A0FIN4|P42831|D2KC06|B3GDZ4|Q711P4|Q8MJD6|Q8SQ34|F1RTH8|O77736|Q19S50|A7BG67|F1RQD6|E7CR04|P23563|E7CR02|I3LQ14|F1SBG3	http://amigo.geneontology.org/cgi-bin/amigo/term_details?term=GO:0048584
regulation of T cell proliferation	Gene Ontology	GO:0042129	8	47	1.55e-06	8.61e-05	P17803|A0FIN4|F1RTH8|F1SUN4|D2KC06|F1RQD6|Q4QTK1|Q5S1V9	http://amigo.geneontology.org/cgi-bin/amigo/term_details?term=GO:0042129
response to biotic stimulus	Gene Ontology	GO:0009607	17	272	1.63e-06	8.86e-05	Q8SQ34|P17803|Q8MJ80|A0FIN4|O77736|B0FYK2|P42831|P23563|D2KC06|B3GDZ4|A7BG67|Q7YRL4|Q66UW5|O77741|I3LV04|F1RQD6|A9QW81	http://amigo.geneontology.org/cgi-bin/amigo/term_details?term=GO:0009607
cellular response to tumor necrosis factor	Gene Ontology	GO:0071356	7	33	1.97e-06	0.000104796	Q8SQ34|O77736|P42831|P23563|B3GDZ4|Q711P4|Q764M5	http://amigo.geneontology.org/cgi-bin/amigo/term_details?term=GO:0071356
regulation of leukocyte activation	Gene Ontology	GO:0002694	11	110	2.05e-06	0.000106705	Q8SQ34|P17803|A0FIN4|P42831|F1RTH8|F1SUN4|D2KC06|B3GDZ4|F1RQD6|Q4QTK1|Q5S1V9	http://amigo.geneontology.org/cgi-bin/amigo/term_details?term=GO:0002694
adaptive immune response based on somatic recombination of immune receptors built from immunoglobulin superfamily domains	Gene Ontology	GO:0002460	9	68	2.24e-06	0.000113693	Q8SQ34|P17803|P01025|F1RTH8|Q69DL0|P23563|A0ZVR0|F1RQD6|Q5S1V9	http://amigo.geneontology.org/cgi-bin/amigo/term_details?term=GO:0002460
antigen processing and presentation	Gene Ontology	GO:0019882	7	34	2.35e-06	0.000116901	P17803|Q9BEA4|A5D9J7|A5D9L3|A5D9J3|Q06AU8|B3SP85	http://amigo.geneontology.org/cgi-bin/amigo/term_details?term=GO:0019882
response to external stimulus	Gene Ontology	GO:0009605	24	531	2.7e-06	0.000130351	Q8MJ80|Q6YST0|B0FYK2|Q7YRL4|O77741|C7F842|P17803|A0FIN4|P42831|D2KC06|B3GDZ4|Q711P4|Q8MJD6|Q8SQ34|Q9TRC7|O77736|A7BG67|F1RQD6|F1SV36|P23563|I3LQ14|Q66UW5|I3LV04|Q764M5	http://amigo.geneontology.org/cgi-bin/amigo/term_details?term=GO:0009605
response to tumor necrosis factor	Gene Ontology	GO:0034612	7	36	3.28e-06	0.000153494	Q8SQ34|O77736|P42831|P23563|B3GDZ4|Q711P4|Q764M5	http://amigo.geneontology.org/cgi-bin/amigo/term_details?term=GO:0034612
regulation of cell activation	Gene Ontology	GO:0050865	11	116	3.31e-06	0.000153494	Q8SQ34|P17803|A0FIN4|P42831|F1RTH8|F1SUN4|D2KC06|B3GDZ4|F1RQD6|Q4QTK1|Q5S1V9	http://amigo.geneontology.org/cgi-bin/amigo/term_details?term=GO:0050865
inflammatory response	Gene Ontology	GO:0006954	13	169	3.64e-06	0.000165232	Q8SQ34|F1SV36|P01025|Q6YST0|O77736|B0FYK2|P42831|P23563|B3GDZ4|Q7YRL4|Q711P4|Q863Z5|Q5S1V9	http://amigo.geneontology.org/cgi-bin/amigo/term_details?term=GO:0006954
response to other organism	Gene Ontology	GO:0051707	16	258	3.72e-06	0.000165853	Q8SQ34|P17803|Q8MJ80|A0FIN4|O77736|B0FYK2|P42831|P23563|D2KC06|B3GDZ4|A7BG67|Q7YRL4|Q66UW5|O77741|I3LV04|F1RQD6	http://amigo.geneontology.org/cgi-bin/amigo/term_details?term=GO:0051707
response to external biotic stimulus	Gene Ontology	GO:0043207	16	259	3.9e-06	0.000170624	Q8SQ34|P17803|Q8MJ80|A0FIN4|O77736|B0FYK2|P42831|P23563|D2KC06|B3GDZ4|A7BG67|Q7YRL4|Q66UW5|O77741|I3LV04|F1RQD6	http://amigo.geneontology.org/cgi-bin/amigo/term_details?term=GO:0043207
regulation of leukocyte differentiation	Gene Ontology	GO:1902105	8	56	5.02e-06	0.000215736	P17803|Q6YST0|A0FIN4|F1STZ3|F1RTH8|P23563|D2KC06|Q5S1V9	http://amigo.geneontology.org/cgi-bin/amigo/term_details?term=GO:1902105
cellular response to lipopolysaccharide	Gene Ontology	GO:0071222	7	39	5.25e-06	0.000219935	P17803|P42831|P23563|B3GDZ4|A7BG67|Q7YRL4|F1RQD6	http://amigo.geneontology.org/cgi-bin/amigo/term_details?term=GO:0071222
response to bacterium	Gene Ontology	GO:0009617	12	148	5.31e-06	0.000219935	Q8SQ34|P17803|O77736|B0FYK2|P42831|P23563|B3GDZ4|A7BG67|Q7YRL4|Q8MJ80|O77741|F1RQD6	http://amigo.geneontology.org/cgi-bin/amigo/term_details?term=GO:0009617
T cell proliferation	Gene Ontology	GO:0042098	8	57	5.65e-06	0.000226645	P17803|A0FIN4|F1RTH8|F1SUN4|D2KC06|F1RQD6|Q4QTK1|Q5S1V9	http://amigo.geneontology.org/cgi-bin/amigo/term_details?term=GO:0042098
regulation of defense response	Gene Ontology	GO:0031347	12	149	5.66e-06	0.000226645	F1SV36|A0FIN4|P42831|E7CR04|P23563|D2KC06|B3GDZ4|A7BG67|Q7YRL4|Q711P4|A0ZVR0|F1RQD6	http://amigo.geneontology.org/cgi-bin/amigo/term_details?term=GO:0031347
regulatory T cell differentiation	Gene Ontology	GO:0045066	4	5	6.07e-06	0.000236031	D2KC06|P17803|A0FIN4|F1SUN4	http://amigo.geneontology.org/cgi-bin/amigo/term_details?term=GO:0045066
cellular response to molecule of bacterial origin	Gene Ontology	GO:0071219	7	40	6.09e-06	0.000236031	P17803|P42831|P23563|B3GDZ4|A7BG67|Q7YRL4|F1RQD6	http://amigo.geneontology.org/cgi-bin/amigo/term_details?term=GO:0071219
activation of immune response	Gene Ontology	GO:0002253	9	79	6.88e-06	0.000262245	P17803|P01025|A0FIN4|Q69DL0|D2KC06|A7BG67|Q7YRL4|A0ZVR0|F1RQD6	http://amigo.geneontology.org/cgi-bin/amigo/term_details?term=GO:0002253
alpha-beta T cell differentiation	Gene Ontology	GO:0046632	6	27	8.74e-06	0.000325276	P17803|A0FIN4|F1RTH8|F1SUN4|D2KC06|Q5S1V9	http://amigo.geneontology.org/cgi-bin/amigo/term_details?term=GO:0046632
regulation of adaptive immune response	Gene Ontology	GO:0002819	7	43	9.32e-06	0.000341326	Q8SQ34|P17803|F1RTH8|P23563|A0ZVR0|F1RQD6|Q5S1V9	http://amigo.geneontology.org/cgi-bin/amigo/term_details?term=GO:0002819
lymphocyte mediated immunity	Gene Ontology	GO:0002449	8	64	1.23e-05	0.000442348	Q8SQ34|P17803|P01025|F1RTH8|Q69DL0|P23563|A0ZVR0|F1RQD6	http://amigo.geneontology.org/cgi-bin/amigo/term_details?term=GO:0002449
toll-like receptor signaling pathway	Gene Ontology	GO:0002224	6	29	1.25e-05	0.000443971	A0FIN4|D2KC06|A7BG67|Q7YRL4|A0ZVR0|F1RQD6	http://amigo.geneontology.org/cgi-bin/amigo/term_details?term=GO:0002224
mononuclear cell proliferation	Gene Ontology	GO:0032943	10	110	1.33e-05	0.000458082	Q8SQ34|P17803|A0FIN4|F1RTH8|F1SUN4|D2KC06|Q7YRL4|F1RQD6|Q4QTK1|Q5S1V9	http://amigo.geneontology.org/cgi-bin/amigo/term_details?term=GO:0032943
lymphocyte proliferation	Gene Ontology	GO:0046651	10	110	1.33e-05	0.000458082	Q8SQ34|P17803|A0FIN4|F1RTH8|F1SUN4|D2KC06|Q7YRL4|F1RQD6|Q4QTK1|Q5S1V9	http://amigo.geneontology.org/cgi-bin/amigo/term_details?term=GO:0046651
alpha-beta T cell activation	Gene Ontology	GO:0046631	6	30	1.48e-05	0.000503447	P17803|A0FIN4|F1RTH8|F1SUN4|D2KC06|Q5S1V9	http://amigo.geneontology.org/cgi-bin/amigo/term_details?term=GO:0046631
cellular response to biotic stimulus	Gene Ontology	GO:0071216	7	47	1.57e-05	0.000526385	P17803|P42831|P23563|B3GDZ4|A7BG67|Q7YRL4|F1RQD6	http://amigo.geneontology.org/cgi-bin/amigo/term_details?term=GO:0071216
response to lipid	Gene Ontology	GO:0033993	13	196	1.64e-05	0.00053822	Q8SQ34|P17803|O77736|B0FYK2|P42831|Q19S50|P23563|E7CR02|B3GDZ4|A7BG67|Q7YRL4|O77741|F1RQD6	http://amigo.geneontology.org/cgi-bin/amigo/term_details?term=GO:0033993
leukocyte proliferation	Gene Ontology	GO:0070661	10	113	1.65e-05	0.00053822	Q8SQ34|P17803|A0FIN4|F1RTH8|F1SUN4|D2KC06|Q7YRL4|F1RQD6|Q4QTK1|Q5S1V9	http://amigo.geneontology.org/cgi-bin/amigo/term_details?term=GO:0070661
immune response-regulating signaling pathway	Gene Ontology	GO:0002764	8	68	1.84e-05	0.000590151	Q8SQ34|P17803|A0FIN4|D2KC06|A7BG67|Q7YRL4|A0ZVR0|F1RQD6	http://amigo.geneontology.org/cgi-bin/amigo/term_details?term=GO:0002764
negative regulation of immune system process	Gene Ontology	GO:0002683	9	91	1.96e-05	0.000621394	A0FIN4|P42831|F1STZ3|P23563|F1SUN4|D2KC06|B3GDZ4|F1RQD6|Q4QTK1	http://amigo.geneontology.org/cgi-bin/amigo/term_details?term=GO:0002683
response to oxygen-containing compound	Gene Ontology	GO:1901700	16	297	2e-05	0.000621394	Q8SQ34|P17803|O77736|B0FYK2|P42831|E7CR04|Q19S50|P23563|A8R080|B3GDZ4|A7BG67|Q7YRL4|O77741|Q764M5|E7CR02|F1RQD6	http://amigo.geneontology.org/cgi-bin/amigo/term_details?term=GO:1901700
regulation of alpha-beta T cell activation	Gene Ontology	GO:0046634	5	18	2.04e-05	0.000621394	D2KC06|P17803|F1RTH8|A0FIN4|Q5S1V9	http://amigo.geneontology.org/cgi-bin/amigo/term_details?term=GO:0046634
lipopolysaccharide-mediated signaling pathway	Gene Ontology	GO:0031663	5	18	2.04e-05	0.000621394	P42831|B3GDZ4|A7BG67|Q7YRL4|P23563	http://amigo.geneontology.org/cgi-bin/amigo/term_details?term=GO:0031663
regulation of cell adhesion	Gene Ontology	GO:0030155	11	144	2.24e-05	0.000675298	P17803|A0FIN4|P42831|F1RTH8|P23563|F1SUN4|D2KC06|B3GDZ4|F1RQD6|Q4QTK1|Q5S1V9	http://amigo.geneontology.org/cgi-bin/amigo/term_details?term=GO:0030155
interferon-gamma-mediated signaling pathway	Gene Ontology	GO:0060333	4	8	2.3e-05	0.000684514	D2KC06|E7CR04|Q764M5|A0FIN4	http://amigo.geneontology.org/cgi-bin/amigo/term_details?term=GO:0060333
innate immune response-activating signal transduction	Gene Ontology	GO:0002758	6	33	2.39e-05	0.000692716	A0FIN4|D2KC06|A7BG67|Q7YRL4|A0ZVR0|F1RQD6	http://amigo.geneontology.org/cgi-bin/amigo/term_details?term=GO:0002758
pattern recognition receptor signaling pathway	Gene Ontology	GO:0002221	6	33	2.39e-05	0.000692716	A0FIN4|D2KC06|A7BG67|Q7YRL4|A0ZVR0|F1RQD6	http://amigo.geneontology.org/cgi-bin/amigo/term_details?term=GO:0002221
external side of plasma membrane	Gene Ontology	GO:0009897	7	51	2.53e-05	0.000715382	Q8SQ34|P17803|Q6YST0|B0FYK2|P23563|A8R080|Q4QTK1	http://amigo.geneontology.org/cgi-bin/amigo/term_details?term=GO:0009897
negative regulation of T cell activation	Gene Ontology	GO:0050868	5	19	2.54e-05	0.000715382	D2KC06|F1RQD6|A0FIN4|Q4QTK1|F1SUN4	http://amigo.geneontology.org/cgi-bin/amigo/term_details?term=GO:0050868
positive regulation of protein metabolic process	Gene Ontology	GO:0051247	19	417	3.03e-05	0.000838249	Q8SQ34|P17803|P01025|Q6YST0|A0FIN4|O77736|P42831|E7CR04|Q8MJ80|P23563|D2KC06|B3GDZ4|Q711P4|Q64L94|F1SCJ8|Q764M5|F1RQD6|Q863Z0|Q5S1V9	http://amigo.geneontology.org/cgi-bin/amigo/term_details?term=GO:0051247
positive regulation of biological process	Gene Ontology	GO:0048518	41	1413	3.39e-05	0.00092524	Q8MJ80|Q6YST0|B0FYK2|Q69DL0|Q7YRL4|M4M653|Q64L94|F1SCJ8|A0ZVR0|Q863Z0|P17803|P01025|F1SJ12|A0FIN4|Q95253|P42831|D2KC06|B3GDZ4|Q711P4|I3LUA0|Q8MJD6|A5D9J7|Q4QTK1|Q8SQ34|F1RTH8|O77736|F1RZR9|F1SEU0|Q19S50|F1S628|A7BG67|F1RQD6|F1SV36|E7CR04|P23563|E7CR02|I3LQ14|A5D9J3|Q764M5|F1SBG3|Q5S1V9	http://amigo.geneontology.org/cgi-bin/amigo/term_details?term=GO:0048518
activation of innate immune response	Gene Ontology	GO:0002218	6	36	3.7e-05	0.000988035	A0FIN4|D2KC06|A7BG67|Q7YRL4|A0ZVR0|F1RQD6	http://amigo.geneontology.org/cgi-bin/amigo/term_details?term=GO:0002218
regulation of cytokine secretion	Gene Ontology	GO:0050707	6	36	3.7e-05	0.000988035	F1SV36|P17803|E7CR04|P23563|F1RQD6|Q4QTK1	http://amigo.geneontology.org/cgi-bin/amigo/term_details?term=GO:0050707
positive regulation of signal transduction	Gene Ontology	GO:0009967	18	386	3.74e-05	0.000988517	Q8SQ34|P17803|P01025|Q6YST0|O77736|B0FYK2|P42831|F1RQD6|Q19S50|P23563|E7CR02|B3GDZ4|A7BG67|Q7YRL4|Q711P4|E7CR04|A0ZVR0|F1SBG3	http://amigo.geneontology.org/cgi-bin/amigo/term_details?term=GO:0009967
leukocyte activation	Gene Ontology	GO:0045321	13	217	4.5e-05	0.00117444	Q8SQ34|P17803|A0FIN4|P42831|F1RTH8|F1SUN4|D2KC06|B3GDZ4|Q7YRL4|I3LV04|F1RQD6|Q4QTK1|Q5S1V9	http://amigo.geneontology.org/cgi-bin/amigo/term_details?term=GO:0045321
leukocyte migration	Gene Ontology	GO:0050900	8	78	4.55e-05	0.00117444	P17803|Q6YST0|B0FYK2|P42831|P23563|I3LQ14|B3GDZ4|Q711P4	http://amigo.geneontology.org/cgi-bin/amigo/term_details?term=GO:0050900
negative regulation of leukocyte cell-cell adhesion	Gene Ontology	GO:1903038	5	22	4.66e-05	0.00118949	D2KC06|F1RQD6|A0FIN4|Q4QTK1|F1SUN4	http://amigo.geneontology.org/cgi-bin/amigo/term_details?term=GO:1903038
cytokine receptor binding	Gene Ontology	GO:0005126	11	157	4.73e-05	0.00119664	P17803|C7F842|B0FYK2|Q95253|P42831|P23563|A0MTC9|B3GDZ4|Q711P4|M4M653|Q5S1V9	http://amigo.geneontology.org/cgi-bin/amigo/term_details?term=GO:0005126
immunoglobulin mediated immune response	Gene Ontology	GO:0016064	6	38	4.86e-05	0.00120178	Q8SQ34|P17803|P01025|Q69DL0|P23563|A0ZVR0	http://amigo.geneontology.org/cgi-bin/amigo/term_details?term=GO:0016064
B cell mediated immunity	Gene Ontology	GO:0019724	6	38	4.86e-05	0.00120178	Q8SQ34|P17803|P01025|Q69DL0|P23563|A0ZVR0	http://amigo.geneontology.org/cgi-bin/amigo/term_details?term=GO:0019724
regulation of response to external stimulus	Gene Ontology	GO:0032101	12	189	5.27e-05	0.00129046	F1SV36|Q6YST0|B0FYK2|P42831|P23563|I3LQ14|B3GDZ4|A7BG67|Q7YRL4|Q711P4|Q8MJD6|F1RQD6	http://amigo.geneontology.org/cgi-bin/amigo/term_details?term=GO:0032101
regulation of innate immune response	Gene Ontology	GO:0045088	7	58	5.37e-05	0.00130218	A0FIN4|E7CR04|D2KC06|A7BG67|Q7YRL4|A0ZVR0|F1RQD6	http://amigo.geneontology.org/cgi-bin/amigo/term_details?term=GO:0045088
cytokine biosynthetic process	Gene Ontology	GO:0042089	6	39	5.53e-05	0.00131445	P17803|A0FIN4|P23563|D2KC06|A0ZVR0|Q5S1V9	http://amigo.geneontology.org/cgi-bin/amigo/term_details?term=GO:0042089
regulation of adaptive immune response based on somatic recombination of immune receptors built from immunoglobulin superfamily domains	Gene Ontology	GO:0002822	6	39	5.53e-05	0.00131445	Q8SQ34|P17803|F1RTH8|P23563|F1RQD6|Q5S1V9	http://amigo.geneontology.org/cgi-bin/amigo/term_details?term=GO:0002822
positive regulation of cytokine biosynthetic process	Gene Ontology	GO:0042108	5	23	5.6e-05	0.00131663	D2KC06|P17803|A0FIN4|P23563|Q5S1V9	http://amigo.geneontology.org/cgi-bin/amigo/term_details?term=GO:0042108
lymphocyte activation	Gene Ontology	GO:0046649	12	191	5.8e-05	0.00134317	Q8SQ34|P17803|A0FIN4|P42831|F1RTH8|F1SUN4|D2KC06|B3GDZ4|Q7YRL4|F1RQD6|Q4QTK1|Q5S1V9	http://amigo.geneontology.org/cgi-bin/amigo/term_details?term=GO:0046649
regulation of hemopoiesis	Gene Ontology	GO:1903706	8	81	5.83e-05	0.00134317	P17803|Q6YST0|A0FIN4|F1STZ3|F1RTH8|P23563|D2KC06|Q5S1V9	http://amigo.geneontology.org/cgi-bin/amigo/term_details?term=GO:1903706
negative regulation of multicellular organismal process	Gene Ontology	GO:0051241	14	257	6.08e-05	0.00137933	Q8MJ80|P17803|Q6YST0|A0FIN4|P42831|F1STZ3|Q19S50|P23563|E7CR02|D2KC06|B3GDZ4|Q764M5|F1RQD6|Q4QTK1	http://amigo.geneontology.org/cgi-bin/amigo/term_details?term=GO:0051241
positive regulation of interleukin-12 production	Gene Ontology	GO:0032735	4	11	6.13e-05	0.00137933	Q8SQ34|P17803|D2KC06|A0FIN4	http://amigo.geneontology.org/cgi-bin/amigo/term_details?term=GO:0032735
leukocyte cell-cell adhesion	Gene Ontology	GO:0007159	11	162	6.19e-05	0.00137994	P17803|A0FIN4|P42831|F1RTH8|P23563|F1SUN4|D2KC06|B3GDZ4|F1RQD6|Q4QTK1|Q5S1V9	http://amigo.geneontology.org/cgi-bin/amigo/term_details?term=GO:0007159
cytokine metabolic process	Gene Ontology	GO:0042107	6	40	6.29e-05	0.00138827	P17803|A0FIN4|P23563|D2KC06|A0ZVR0|Q5S1V9	http://amigo.geneontology.org/cgi-bin/amigo/term_details?term=GO:0042107
positive regulation of cell-cell adhesion	Gene Ontology	GO:0022409	7	60	6.54e-05	0.00143188	P17803|P42831|F1RTH8|P23563|B3GDZ4|F1RQD6|Q4QTK1	http://amigo.geneontology.org/cgi-bin/amigo/term_details?term=GO:0022409
regulation of interferon-gamma production	Gene Ontology	GO:0032649	5	24	6.68e-05	0.00143589	F1RTH8|F1RQD6|P23563|Q4QTK1|Q5S1V9	http://amigo.geneontology.org/cgi-bin/amigo/term_details?term=GO:0032649
chemokine activity	Gene Ontology	GO:0008009	5	24	6.68e-05	0.00143589	P42831|B3GDZ4|C7F842|Q711P4|B0FYK2	http://amigo.geneontology.org/cgi-bin/amigo/term_details?term=GO:0008009
regulation of cell proliferation	Gene Ontology	GO:0042127	18	406	7.03e-05	0.00149695	Q8SQ34|P17803|F1RTH8|A0FIN4|O77736|B0FYK2|E7CR02|Q19S50|P23563|F1SUN4|D2KC06|Q95253|M4M653|Q764M5|B3SP85|F1RQD6|Q4QTK1|Q5S1V9	http://amigo.geneontology.org/cgi-bin/amigo/term_details?term=GO:0042127
cytokine secretion	Gene Ontology	GO:0050663	6	41	7.12e-05	0.00150157	F1SV36|P17803|E7CR04|P23563|F1RQD6|Q4QTK1	http://amigo.geneontology.org/cgi-bin/amigo/term_details?term=GO:0050663
adaptive immune response	Gene Ontology	GO:0002250	9	110	7.83e-05	0.00160573	Q8SQ34|P17803|P01025|F1RTH8|Q69DL0|P23563|A0ZVR0|F1RQD6|Q5S1V9	http://amigo.geneontology.org/cgi-bin/amigo/term_details?term=GO:0002250
leukocyte chemotaxis	Gene Ontology	GO:0030595	7	62	7.92e-05	0.00160573	P17803|Q6YST0|B0FYK2|P42831|I3LQ14|B3GDZ4|Q711P4	http://amigo.geneontology.org/cgi-bin/amigo/term_details?term=GO:0030595
positive regulation of cytokine secretion	Gene Ontology	GO:0050715	5	25	7.92e-05	0.00160573	F1SV36|F1RQD6|P23563|Q4QTK1|P17803	http://amigo.geneontology.org/cgi-bin/amigo/term_details?term=GO:0050715
cell chemotaxis	Gene Ontology	GO:0060326	8	85	7.98e-05	0.00160573	P17803|Q6YST0|C7F842|B0FYK2|P42831|I3LQ14|B3GDZ4|Q711P4	http://amigo.geneontology.org/cgi-bin/amigo/term_details?term=GO:0060326
leukocyte mediated immunity	Gene Ontology	GO:0002443	8	85	7.98e-05	0.00160573	Q8SQ34|P17803|P01025|F1RTH8|Q69DL0|P23563|A0ZVR0|F1RQD6	http://amigo.geneontology.org/cgi-bin/amigo/term_details?term=GO:0002443
immune response-activating signal transduction	Gene Ontology	GO:0002757	7	63	8.69e-05	0.00173211	P17803|A0FIN4|D2KC06|A7BG67|Q7YRL4|A0ZVR0|F1RQD6	http://amigo.geneontology.org/cgi-bin/amigo/term_details?term=GO:0002757
interferon-gamma production	Gene Ontology	GO:0032609	5	26	9.33e-05	0.00181513	F1RTH8|F1RQD6|P23563|Q4QTK1|Q5S1V9	http://amigo.geneontology.org/cgi-bin/amigo/term_details?term=GO:0032609
regulation of T cell differentiation	Gene Ontology	GO:0045580	5	26	9.33e-05	0.00181513	D2KC06|P17803|F1RTH8|A0FIN4|Q5S1V9	http://amigo.geneontology.org/cgi-bin/amigo/term_details?term=GO:0045580
chemokine receptor binding	Gene Ontology	GO:0042379	5	26	9.33e-05	0.00181513	P42831|B3GDZ4|C7F842|Q711P4|B0FYK2	http://amigo.geneontology.org/cgi-bin/amigo/term_details?term=GO:0042379
positive regulation of cell communication	Gene Ontology	GO:0010647	18	416	9.48e-05	0.00182066	Q8SQ34|P17803|P01025|Q6YST0|O77736|B0FYK2|P42831|F1RQD6|Q19S50|P23563|E7CR02|B3GDZ4|A7BG67|Q7YRL4|Q711P4|E7CR04|A0ZVR0|F1SBG3	http://amigo.geneontology.org/cgi-bin/amigo/term_details?term=GO:0010647
positive regulation of lymphocyte activation	Gene Ontology	GO:0051251	7	64	9.52e-05	0.00182066	Q8SQ34|P17803|P42831|F1RTH8|B3GDZ4|F1RQD6|Q4QTK1	http://amigo.geneontology.org/cgi-bin/amigo/term_details?term=GO:0051251
positive regulation of signaling	Gene Ontology	GO:0023056	18	417	9.77e-05	0.00185363	Q8SQ34|P17803|P01025|Q6YST0|O77736|B0FYK2|P42831|F1RQD6|Q19S50|P23563|E7CR02|B3GDZ4|A7BG67|Q7YRL4|Q711P4|E7CR04|A0ZVR0|F1SBG3	http://amigo.geneontology.org/cgi-bin/amigo/term_details?term=GO:0023056
regulation of multicellular organismal process	Gene Ontology	GO:0051239	24	669	0.000106709	0.00200919	Q8MJ80|Q6YST0|B3GDZ4|A0ZVR0|P17803|A0FIN4|P42831|F1STZ3|D2KC06|I3LUA0|Q8MJD6|Q4QTK1|Q8SQ34|F1RTH8|Q19S50|A7BG67|F1RQD6|F1SV36|E7CR04|P23563|E7CR02|I3LQ14|Q764M5|Q5S1V9	http://amigo.geneontology.org/cgi-bin/amigo/term_details?term=GO:0051239
neutrophil chemotaxis	Gene Ontology	GO:0030593	5	27	0.000109272	0.00203315	P42831|B3GDZ4|Q711P4|I3LQ14|P17803	http://amigo.geneontology.org/cgi-bin/amigo/term_details?term=GO:0030593
positive regulation of innate immune response	Gene Ontology	GO:0045089	6	45	0.000113573	0.00209667	A0FIN4|D2KC06|A7BG67|Q7YRL4|A0ZVR0|F1RQD6	http://amigo.geneontology.org/cgi-bin/amigo/term_details?term=GO:0045089
cytokine activity	Gene Ontology	GO:0005125	10	145	0.000119612	0.00219066	P17803|C7F842|B0FYK2|Q95253|P42831|P23563|B3GDZ4|Q711P4|M4M653|Q5S1V9	http://amigo.geneontology.org/cgi-bin/amigo/term_details?term=GO:0005125
regulation of response to stimulus	Gene Ontology	GO:0048583	29	901	0.000120518	0.00219066	Q6YST0|B0FYK2|Q69DL0|Q7YRL4|A0ZVR0|P17803|P01025|A0FIN4|P42831|I3LEA2|D2KC06|B3GDZ4|Q711P4|Q8MJD6|Q8SQ34|F1RTH8|O77736|F1RZR9|Q19S50|A7BG67|F1RQD6|F1SV36|E7CR04|P23563|E7CR02|I3LQ14|Q764M5|F1SBG3|Q5S1V9	http://amigo.geneontology.org/cgi-bin/amigo/term_details?term=GO:0048583
regulation of tumor necrosis factor superfamily cytokine production	Gene Ontology	GO:1903555	5	28	0.000127224	0.00226038	P17803|A7BG67|F1RTH8|F1RQD6|Q4QTK1	http://amigo.geneontology.org/cgi-bin/amigo/term_details?term=GO:1903555
neutrophil migration	Gene Ontology	GO:1990266	5	28	0.000127224	0.00226038	P42831|B3GDZ4|Q711P4|I3LQ14|P17803	http://amigo.geneontology.org/cgi-bin/amigo/term_details?term=GO:1990266
negative regulation of lymphocyte activation	Gene Ontology	GO:0051250	5	28	0.000127224	0.00226038	D2KC06|F1RQD6|A0FIN4|Q4QTK1|F1SUN4	http://amigo.geneontology.org/cgi-bin/amigo/term_details?term=GO:0051250
response to stress	Gene Ontology	GO:0006950	29	905	0.000130006	0.0022645	Q8MJ80|Q6YST0|B0FYK2|Q69DL0|Q7YRL4|Q863Z5|P17803|P01025|A0ZVR0|A0FIN4|P42831|D2KC06|B3GDZ4|Q711P4|Q8MJD6|Q8SQ34|Q9TRC7|O77736|F1RWZ9|A7BG67|F1RQD6|F1SV36|Q5XLD3|E7CR04|P23563|Q66UW5|I3LV04|Q764M5|Q5S1V9	http://amigo.geneontology.org/cgi-bin/amigo/term_details?term=GO:0006950
T cell activation	Gene Ontology	GO:0042110	10	147	0.000133035	0.0022645	P17803|A0FIN4|P42831|F1RTH8|F1SUN4|D2KC06|B3GDZ4|F1RQD6|Q4QTK1|Q5S1V9	http://amigo.geneontology.org/cgi-bin/amigo/term_details?term=GO:0042110
leukocyte differentiation	Gene Ontology	GO:0002521	10	147	0.000133035	0.0022645	P17803|Q6YST0|A0FIN4|F1STZ3|F1RTH8|P23563|F1SUN4|D2KC06|I3LV04|Q5S1V9	http://amigo.geneontology.org/cgi-bin/amigo/term_details?term=GO:0002521
T cell aggregation	Gene Ontology	GO:0070489	10	147	0.000133035	0.0022645	P17803|A0FIN4|P42831|F1RTH8|F1SUN4|D2KC06|B3GDZ4|F1RQD6|Q4QTK1|Q5S1V9	http://amigo.geneontology.org/cgi-bin/amigo/term_details?term=GO:0070489
lymphocyte aggregation	Gene Ontology	GO:0071593	10	147	0.000133035	0.0022645	P17803|A0FIN4|P42831|F1RTH8|F1SUN4|D2KC06|B3GDZ4|F1RQD6|Q4QTK1|Q5S1V9	http://amigo.geneontology.org/cgi-bin/amigo/term_details?term=GO:0071593
response to organic substance	Gene Ontology	GO:0010033	24	679	0.000133206	0.0022645	Q6YST0|B0FYK2|Q7YRL4|O77741|Q863Z5|P17803|A0ZVR0|A0FIN4|P42831|D2KC06|B3GDZ4|Q711P4|Q4QTK1|Q8SQ34|Q9TRC7|O77736|Q19S50|A7BG67|F1RQD6|E7CR02|E7CR04|P23563|A8R080|Q764M5	http://amigo.geneontology.org/cgi-bin/amigo/term_details?term=GO:0010033
positive regulation of transport	Gene Ontology	GO:0051050	12	211	0.000142667	0.00239944	Q8MJ80|F1SV36|P01025|Q6YST0|P17803|P42831|P23563|B0FYK2|Q4QTK1|I3LUA0|F1RQD6|B3GDZ4	http://amigo.geneontology.org/cgi-bin/amigo/term_details?term=GO:0051050
tumor necrosis factor superfamily cytokine production	Gene Ontology	GO:0071706	5	29	0.000147352	0.00246073	P17803|A7BG67|F1RTH8|F1RQD6|Q4QTK1	http://amigo.geneontology.org/cgi-bin/amigo/term_details?term=GO:0071706
myeloid leukocyte migration	Gene Ontology	GO:0097529	6	48	0.00015691	0.00260195	P17803|Q6YST0|P42831|I3LQ14|B3GDZ4|Q711P4	http://amigo.geneontology.org/cgi-bin/amigo/term_details?term=GO:0097529
leukocyte aggregation	Gene Ontology	GO:0070486	10	151	0.00016373	0.00269613	P17803|A0FIN4|P42831|F1RTH8|F1SUN4|D2KC06|B3GDZ4|F1RQD6|Q4QTK1|Q5S1V9	http://amigo.geneontology.org/cgi-bin/amigo/term_details?term=GO:0070486
antigen processing and presentation of peptide antigen	Gene Ontology	GO:0048002	4	15	0.000166002	0.00271462	A5D9J7|A5D9J3|Q9BEA4|B3SP85	http://amigo.geneontology.org/cgi-bin/amigo/term_details?term=GO:0048002
negative regulation of developmental process	Gene Ontology	GO:0051093	12	215	0.000168612	0.00273835	P17803|Q6YST0|A0FIN4|P42831|F1STZ3|Q19S50|P23563|E7CR02|D2KC06|B3GDZ4|Q8MJD6|Q764M5	http://amigo.geneontology.org/cgi-bin/amigo/term_details?term=GO:0051093
positive regulation of T cell activation	Gene Ontology	GO:0050870	6	49	0.000173947	0.00280572	P17803|P42831|F1RTH8|B3GDZ4|F1RQD6|Q4QTK1	http://amigo.geneontology.org/cgi-bin/amigo/term_details?term=GO:0050870
cellular response to organic substance	Gene Ontology	GO:0071310	21	562	0.000177835	0.00284898	Q8SQ34|P17803|Q6YST0|A0FIN4|O77736|B0FYK2|P42831|E7CR04|Q19S50|Q863Z5|P23563|E7CR02|D2KC06|B3GDZ4|A7BG67|Q7YRL4|Q711P4|Q9TRC7|Q764M5|A0ZVR0|F1RQD6	http://amigo.geneontology.org/cgi-bin/amigo/term_details?term=GO:0071310
CD8-positive, alpha-beta T cell activation	Gene Ontology	GO:0036037	3	5	0.000182118	0.00287856	D2KC06|P17803|A0FIN4	http://amigo.geneontology.org/cgi-bin/amigo/term_details?term=GO:0036037
CD8-positive, alpha-beta T cell differentiation	Gene Ontology	GO:0043374	3	5	0.000182118	0.00287856	D2KC06|P17803|A0FIN4	http://amigo.geneontology.org/cgi-bin/amigo/term_details?term=GO:0043374
extracellular space	Gene Ontology	GO:0005615	19	480	0.000184142	0.00289121	C7F842|P17803|P01025|Q5XLD3|Q9TRC7|B0FYK2|Q95253|P42831|F1STZ3|Q8MJ80|P23563|F1S2T7|Q711P4|I3LUA0|M4M653|Q9TUB5|F1SCC6|B3GDZ4|Q5S1V9	http://amigo.geneontology.org/cgi-bin/amigo/term_details?term=GO:0005615
positive regulation of leukocyte activation	Gene Ontology	GO:0002696	7	72	0.00018752	0.00292482	Q8SQ34|P17803|P42831|F1RTH8|B3GDZ4|F1RQD6|Q4QTK1	http://amigo.geneontology.org/cgi-bin/amigo/term_details?term=GO:0002696
positive regulation of leukocyte cell-cell adhesion	Gene Ontology	GO:1903039	6	50	0.000192415	0.00297986	P17803|P42831|F1RTH8|B3GDZ4|F1RQD6|Q4QTK1	http://amigo.geneontology.org/cgi-bin/amigo/term_details?term=GO:1903039
negative regulation of cell-cell adhesion	Gene Ontology	GO:0022408	5	31	0.000194832	0.00297986	D2KC06|F1RQD6|A0FIN4|Q4QTK1|F1SUN4	http://amigo.geneontology.org/cgi-bin/amigo/term_details?term=GO:0022408
negative regulation of leukocyte activation	Gene Ontology	GO:0002695	5	31	0.000194832	0.00297986	D2KC06|F1RQD6|A0FIN4|Q4QTK1|F1SUN4	http://amigo.geneontology.org/cgi-bin/amigo/term_details?term=GO:0002695
cell activation	Gene Ontology	GO:0001775	13	254	0.000203626	0.00308441	Q8SQ34|P17803|A0FIN4|P42831|F1RTH8|F1SUN4|D2KC06|B3GDZ4|Q7YRL4|I3LV04|F1RQD6|Q4QTK1|Q5S1V9	http://amigo.geneontology.org/cgi-bin/amigo/term_details?term=GO:0001775
cellular response to oxygen-containing compound	Gene Ontology	GO:1901701	11	188	0.000215671	0.00324606	P17803|P42831|E7CR04|Q19S50|P23563|E7CR02|B3GDZ4|A7BG67|Q7YRL4|Q764M5|F1RQD6	http://amigo.geneontology.org/cgi-bin/amigo/term_details?term=GO:1901701
negative regulation of cell proliferation	Gene Ontology	GO:0008285	10	157	0.000220851	0.00328674	P17803|A0FIN4|Q19S50|F1SUN4|D2KC06|Q764M5|E7CR02|F1RQD6|Q4QTK1|B3SP85	http://amigo.geneontology.org/cgi-bin/amigo/term_details?term=GO:0008285
granulocyte chemotaxis	Gene Ontology	GO:0071621	5	32	0.000222547	0.00328674	P42831|B3GDZ4|Q711P4|I3LQ14|P17803	http://amigo.geneontology.org/cgi-bin/amigo/term_details?term=GO:0071621
negative regulation of cell activation	Gene Ontology	GO:0050866	5	32	0.000222547	0.00328674	D2KC06|F1RQD6|A0FIN4|Q4QTK1|F1SUN4	http://amigo.geneontology.org/cgi-bin/amigo/term_details?term=GO:0050866
transcription factor activity, RNA polymerase II core promoter proximal region sequence-specific binding	Gene Ontology	GO:0000982	8	100	0.000228071	0.00334741	A0FIN4|O97930|Q19S50|E7CR02|D2KC06|A0A140TAJ8|I3LV04|A0ZVR0	http://amigo.geneontology.org/cgi-bin/amigo/term_details?term=GO:0000982
positive regulation of immune effector process	Gene Ontology	GO:0002699	6	52	0.000233979	0.00339824	Q8SQ34|P17803|P42831|F1RTH8|P23563|B3GDZ4	http://amigo.geneontology.org/cgi-bin/amigo/term_details?term=GO:0002699
positive regulation of cellular process	Gene Ontology	GO:0048522	36	1282	0.000234411	0.00339824	Q8MJ80|Q6YST0|B0FYK2|Q7YRL4|M4M653|Q64L94|F1SCJ8|A0ZVR0|Q863Z0|P17803|P01025|A0FIN4|Q95253|P42831|D2KC06|B3GDZ4|Q711P4|Q8MJD6|Q4QTK1|Q8SQ34|F1RTH8|O77736|F1RZR9|F1SEU0|Q19S50|F1S628|A7BG67|F1RQD6|F1SV36|E7CR04|P23563|E7CR02|I3LQ14|Q764M5|F1SBG3|Q5S1V9	http://amigo.geneontology.org/cgi-bin/amigo/term_details?term=GO:0048522
positive regulation of cell activation	Gene Ontology	GO:0050867	7	75	0.00023682	0.00341222	Q8SQ34|P17803|P42831|F1RTH8|B3GDZ4|F1RQD6|Q4QTK1	http://amigo.geneontology.org/cgi-bin/amigo/term_details?term=GO:0050867
regulation of interleukin-12 production	Gene Ontology	GO:0032655	4	17	0.000250346	0.00358526	Q8SQ34|P17803|D2KC06|A0FIN4	http://amigo.geneontology.org/cgi-bin/amigo/term_details?term=GO:0032655
granulocyte migration	Gene Ontology	GO:0097530	5	33	0.000253165	0.00360379	P42831|B3GDZ4|Q711P4|I3LQ14|P17803	http://amigo.geneontology.org/cgi-bin/amigo/term_details?term=GO:0097530
antigen processing and presentation of exogenous peptide antigen	Gene Ontology	GO:0002478	3	6	0.00027014	0.00375495	A5D9J7|A5D9J3|B3SP85	http://amigo.geneontology.org/cgi-bin/amigo/term_details?term=GO:0002478
regulation of interleukin-12 biosynthetic process	Gene Ontology	GO:0045075	3	6	0.00027014	0.00375495	D2KC06|P17803|A0FIN4	http://amigo.geneontology.org/cgi-bin/amigo/term_details?term=GO:0045075
positive regulation of interleukin-12 biosynthetic process	Gene Ontology	GO:0045084	3	6	0.00027014	0.00375495	D2KC06|P17803|A0FIN4	http://amigo.geneontology.org/cgi-bin/amigo/term_details?term=GO:0045084
interleukin-12 biosynthetic process	Gene Ontology	GO:0042090	3	6	0.00027014	0.00375495	D2KC06|P17803|A0FIN4	http://amigo.geneontology.org/cgi-bin/amigo/term_details?term=GO:0042090
chemical homeostasis	Gene Ontology	GO:0048878	13	262	0.000271898	0.00375728	Q8SQ34|Q8MJ80|Q6YST0|C7F842|F1RZR9|B0FYK2|Q19S50|F1S3B7|E7CR02|I3LQ14|O77741|I3LUA0|C3VML0	http://amigo.geneontology.org/cgi-bin/amigo/term_details?term=GO:0048878
divalent metal ion transport	Gene Ontology	GO:0070838	8	103	0.000275362	0.00376116	Q8MJ80|Q6YST0|C7F842|F1RZR9|B0FYK2|P42831|B3GDZ4|Q9TUB5	http://amigo.geneontology.org/cgi-bin/amigo/term_details?term=GO:0070838
divalent inorganic cation transport	Gene Ontology	GO:0072511	8	103	0.000275362	0.00376116	Q8MJ80|Q6YST0|C7F842|F1RZR9|B0FYK2|P42831|B3GDZ4|Q9TUB5	http://amigo.geneontology.org/cgi-bin/amigo/term_details?term=GO:0072511
regulation of lymphocyte differentiation	Gene Ontology	GO:0045619	5	34	0.000286882	0.00388482	D2KC06|P17803|F1RTH8|A0FIN4|Q5S1V9	http://amigo.geneontology.org/cgi-bin/amigo/term_details?term=GO:0045619
cell surface	Gene Ontology	GO:0009986	10	163	0.000293865	0.00395672	Q8SQ34|P17803|Q6YST0|Q9BEA4|B0FYK2|P23563|A8R080|I3LUA0|F1RQD6|Q4QTK1	http://amigo.geneontology.org/cgi-bin/amigo/term_details?term=GO:0009986
positive regulation of tumor necrosis factor production	Gene Ontology	GO:0032760	4	18	0.000302391	0.00398078	P17803|A7BG67|F1RTH8|F1RQD6	http://amigo.geneontology.org/cgi-bin/amigo/term_details?term=GO:0032760
positive regulation of interferon-gamma production	Gene Ontology	GO:0032729	4	18	0.000302391	0.00398078	F1RTH8|F1RQD6|P23563|Q5S1V9	http://amigo.geneontology.org/cgi-bin/amigo/term_details?term=GO:0032729
regulation of type I interferon production	Gene Ontology	GO:0032479	4	18	0.000302391	0.00398078	D2KC06|F1RQD6|A0ZVR0|A0FIN4	http://amigo.geneontology.org/cgi-bin/amigo/term_details?term=GO:0032479
positive regulation of tumor necrosis factor superfamily cytokine production	Gene Ontology	GO:1903557	4	18	0.000302391	0.00398078	P17803|A7BG67|F1RTH8|F1RQD6	http://amigo.geneontology.org/cgi-bin/amigo/term_details?term=GO:1903557
regulation of cytokine biosynthetic process	Gene Ontology	GO:0042035	5	35	0.000323899	0.00424029	D2KC06|P17803|A0FIN4|P23563|Q5S1V9	http://amigo.geneontology.org/cgi-bin/amigo/term_details?term=GO:0042035
cellular response to chemical stimulus	Gene Ontology	GO:0070887	23	677	0.000327696	0.00426636	Q6YST0|B0FYK2|Q7YRL4|Q9TRC7|Q863Z5|P17803|A0ZVR0|A0FIN4|P42831|D2KC06|B3GDZ4|Q711P4|Q8SQ34|C7F842|O77736|Q19S50|A7BG67|F1RQD6|E7CR04|P23563|E7CR02|I3LQ14|Q764M5	http://amigo.geneontology.org/cgi-bin/amigo/term_details?term=GO:0070887
regulation of multicellular organismal development	Gene Ontology	GO:2000026	17	421	0.000330614	0.00428077	Q8SQ34|P17803|Q6YST0|A0FIN4|P42831|F1STZ3|Q19S50|P23563|F1RTH8|E7CR02|I3LQ14|B3GDZ4|D2KC06|Q8MJD6|F1RQD6|Q764M5|Q5S1V9	http://amigo.geneontology.org/cgi-bin/amigo/term_details?term=GO:2000026
cell proliferation	Gene Ontology	GO:0008283	19	507	0.000360106	0.00455916	Q8SQ34|P17803|F1RTH8|A0FIN4|O77736|B0FYK2|E7CR02|Q19S50|P23563|F1SUN4|D2KC06|Q95253|Q7YRL4|M4M653|Q764M5|B3SP85|F1RQD6|Q4QTK1|Q5S1V9	http://amigo.geneontology.org/cgi-bin/amigo/term_details?term=GO:0008283
interleukin-12 production	Gene Ontology	GO:0032615	4	19	0.000361762	0.00455916	Q8SQ34|P17803|D2KC06|A0FIN4	http://amigo.geneontology.org/cgi-bin/amigo/term_details?term=GO:0032615
monocyte chemotaxis	Gene Ontology	GO:0002548	4	19	0.000361762	0.00455916	P42831|B3GDZ4|Q6YST0|Q711P4	http://amigo.geneontology.org/cgi-bin/amigo/term_details?term=GO:0002548
type I interferon production	Gene Ontology	GO:0032606	4	19	0.000361762	0.00455916	D2KC06|F1RQD6|A0ZVR0|A0FIN4	http://amigo.geneontology.org/cgi-bin/amigo/term_details?term=GO:0032606
regulation of immunoglobulin production	Gene Ontology	GO:0002637	4	19	0.000361762	0.00455916	Q8SQ34|P17803|F1RTH8|P23563	http://amigo.geneontology.org/cgi-bin/amigo/term_details?term=GO:0002637
regulation of immune effector process	Gene Ontology	GO:0002697	8	108	0.000371839	0.00466131	Q8SQ34|P17803|P42831|F1RTH8|P23563|B3GDZ4|F1RQD6|Q5S1V9	http://amigo.geneontology.org/cgi-bin/amigo/term_details?term=GO:0002697
regulation of tyrosine phosphorylation of Stat1 protein	Gene Ontology	GO:0042510	3	7	0.000381627	0.00470906	Q8SQ34|P17803|E7CR04	http://amigo.geneontology.org/cgi-bin/amigo/term_details?term=GO:0042510
MyD88-dependent toll-like receptor signaling pathway	Gene Ontology	GO:0002755	3	7	0.000381627	0.00470906	D2KC06|A0ZVR0|A0FIN4	http://amigo.geneontology.org/cgi-bin/amigo/term_details?term=GO:0002755
positive regulation of interleukin-1 production	Gene Ontology	GO:0032732	3	7	0.000381627	0.00470906	F1SV36|F1RQD6|P17803	http://amigo.geneontology.org/cgi-bin/amigo/term_details?term=GO:0032732
single organismal cell-cell adhesion	Gene Ontology	GO:0016337	11	203	0.000403421	0.00495212	P17803|A0FIN4|P42831|F1RTH8|P23563|F1SUN4|D2KC06|B3GDZ4|F1RQD6|Q4QTK1|Q5S1V9	http://amigo.geneontology.org/cgi-bin/amigo/term_details?term=GO:0016337
regulation of hydrolase activity	Gene Ontology	GO:0051336	14	312	0.000420865	0.00513955	Q8SQ34|P17803|P01025|O77736|P42831|F1SCC6|I3LEA2|P23563|B3GDZ4|Q711P4|Q64L94|Q764M5|I3LS74|Q863Z0	http://amigo.geneontology.org/cgi-bin/amigo/term_details?term=GO:0051336
phospholipase activity	Gene Ontology	GO:0004620	4	20	0.000429028	0.0052123	I3LUA0|F1S2T7|Q6YST0|F1SUN4	http://amigo.geneontology.org/cgi-bin/amigo/term_details?term=GO:0004620
RNA polymerase II core promoter proximal region sequence-specific DNA binding	Gene Ontology	GO:0000978	7	84	0.000450224	0.00540505	A0FIN4|O97930|Q19S50|E7CR02|D2KC06|A0A140TAJ8|I3LV04	http://amigo.geneontology.org/cgi-bin/amigo/term_details?term=GO:0000978
regulation of developmental process	Gene Ontology	GO:0050793	20	560	0.000455066	0.00540505	Q8SQ34|P17803|Q6YST0|A0FIN4|F1S628|B0FYK2|P42831|F1STZ3|F1SEU0|Q19S50|P23563|F1RTH8|E7CR02|I3LQ14|B3GDZ4|D2KC06|Q8MJD6|F1RQD6|Q764M5|Q5S1V9	http://amigo.geneontology.org/cgi-bin/amigo/term_details?term=GO:0050793
chemokine-mediated signaling pathway	Gene Ontology	GO:0070098	5	38	0.000456854	0.00540505	P42831|B3GDZ4|Q6YST0|Q711P4|B0FYK2	http://amigo.geneontology.org/cgi-bin/amigo/term_details?term=GO:0070098
regulation of lymphocyte mediated immunity	Gene Ontology	GO:0002706	5	38	0.000456854	0.00540505	Q8SQ34|P17803|F1RTH8|F1RQD6|P23563	http://amigo.geneontology.org/cgi-bin/amigo/term_details?term=GO:0002706
positive regulation of leukocyte chemotaxis	Gene Ontology	GO:0002690	5	38	0.000456854	0.00540505	P42831|B3GDZ4|Q6YST0|I3LQ14|B0FYK2	http://amigo.geneontology.org/cgi-bin/amigo/term_details?term=GO:0002690
positive regulation of cellular protein metabolic process	Gene Ontology	GO:0032270	16	393	0.000458617	0.00540505	Q8SQ34|P17803|P01025|Q6YST0|O77736|P42831|E7CR04|Q8MJ80|P23563|B3GDZ4|Q711P4|Q64L94|F1SCJ8|Q764M5|F1RQD6|Q863Z0	http://amigo.geneontology.org/cgi-bin/amigo/term_details?term=GO:0032270
CD4-positive, alpha-beta T cell activation	Gene Ontology	GO:0035710	4	21	0.000504766	0.00582512	P17803|Q5S1V9|F1RTH8|F1SUN4	http://amigo.geneontology.org/cgi-bin/amigo/term_details?term=GO:0035710
CD4-positive, alpha-beta T cell differentiation	Gene Ontology	GO:0043367	4	21	0.000504766	0.00582512	P17803|Q5S1V9|F1RTH8|F1SUN4	http://amigo.geneontology.org/cgi-bin/amigo/term_details?term=GO:0043367
side of membrane	Gene Ontology	GO:0098552	7	86	0.000513884	0.00582512	Q8SQ34|P17803|Q6YST0|B0FYK2|P23563|A8R080|Q4QTK1	http://amigo.geneontology.org/cgi-bin/amigo/term_details?term=GO:0098552
regulation of vascular endothelial growth factor production	Gene Ontology	GO:0010574	3	8	0.000518911	0.00582512	P42831|B3GDZ4|I3LQ14	http://amigo.geneontology.org/cgi-bin/amigo/term_details?term=GO:0010574
regulation of macrophage chemotaxis	Gene Ontology	GO:0010758	3	8	0.000518911	0.00582512	P42831|B3GDZ4|I3LQ14	http://amigo.geneontology.org/cgi-bin/amigo/term_details?term=GO:0010758
positive regulation of macrophage chemotaxis	Gene Ontology	GO:0010759	3	8	0.000518911	0.00582512	P42831|B3GDZ4|I3LQ14	http://amigo.geneontology.org/cgi-bin/amigo/term_details?term=GO:0010759
CCR chemokine receptor binding	Gene Ontology	GO:0048020	3	8	0.000518911	0.00582512	P42831|B3GDZ4|Q711P4	http://amigo.geneontology.org/cgi-bin/amigo/term_details?term=GO:0048020
vascular endothelial growth factor production	Gene Ontology	GO:0010573	3	8	0.000518911	0.00582512	P42831|B3GDZ4|I3LQ14	http://amigo.geneontology.org/cgi-bin/amigo/term_details?term=GO:0010573
positive regulation of osteoclast differentiation	Gene Ontology	GO:0045672	3	8	0.000518911	0.00582512	P17803|Q6YST0|P23563	http://amigo.geneontology.org/cgi-bin/amigo/term_details?term=GO:0045672
tyrosine phosphorylation of Stat1 protein	Gene Ontology	GO:0042508	3	8	0.000518911	0.00582512	Q8SQ34|P17803|E7CR04	http://amigo.geneontology.org/cgi-bin/amigo/term_details?term=GO:0042508
regulation of response to stress	Gene Ontology	GO:0080134	13	282	0.000533453	0.00594599	F1SV36|A0FIN4|P42831|E7CR04|P23563|D2KC06|B3GDZ4|A7BG67|Q7YRL4|Q711P4|Q8MJD6|A0ZVR0|F1RQD6	http://amigo.geneontology.org/cgi-bin/amigo/term_details?term=GO:0080134
homeostatic process	Gene Ontology	GO:0042592	16	399	0.000538031	0.00596887	Q8SQ34|P17803|Q6YST0|C7F842|F1RZR9|B0FYK2|Q19S50|P23563|F1S3B7|E7CR02|I3LQ14|Q8MJ80|O77741|I3LUA0|F1RTH8|C3VML0	http://amigo.geneontology.org/cgi-bin/amigo/term_details?term=GO:0042592
regulation of protein secretion	Gene Ontology	GO:0050708	7	87	0.000548298	0.00599123	Q8SQ34|F1SV36|P17803|E7CR04|P23563|F1RQD6|Q4QTK1	http://amigo.geneontology.org/cgi-bin/amigo/term_details?term=GO:0050708
calcium ion transport	Gene Ontology	GO:0006816	7	87	0.000548298	0.00599123	Q6YST0|C7F842|F1RZR9|B0FYK2|P42831|B3GDZ4|Q9TUB5	http://amigo.geneontology.org/cgi-bin/amigo/term_details?term=GO:0006816
positive regulation of cell adhesion	Gene Ontology	GO:0045785	7	87	0.000548298	0.00599123	P17803|P42831|F1RTH8|P23563|B3GDZ4|F1RQD6|Q4QTK1	http://amigo.geneontology.org/cgi-bin/amigo/term_details?term=GO:0045785
single organism cell adhesion	Gene Ontology	GO:0098602	11	211	0.000550189	0.00599123	P17803|A0FIN4|P42831|F1RTH8|P23563|F1SUN4|D2KC06|B3GDZ4|F1RQD6|Q4QTK1|Q5S1V9	http://amigo.geneontology.org/cgi-bin/amigo/term_details?term=GO:0098602
T cell differentiation	Gene Ontology	GO:0030217	6	62	0.000558887	0.00604977	P17803|A0FIN4|F1RTH8|F1SUN4|D2KC06|Q5S1V9	http://amigo.geneontology.org/cgi-bin/amigo/term_details?term=GO:0030217
regulation of signal transduction	Gene Ontology	GO:0009966	23	704	0.000560685	0.00604977	Q6YST0|B0FYK2|Q7YRL4|A0ZVR0|P17803|P01025|A0FIN4|P42831|I3LEA2|D2KC06|B3GDZ4|Q711P4|Q8SQ34|O77736|F1RZR9|Q19S50|A7BG67|F1RQD6|E7CR04|P23563|E7CR02|Q764M5|F1SBG3	http://amigo.geneontology.org/cgi-bin/amigo/term_details?term=GO:0009966
positive regulation of ERK1 and ERK2 cascade	Gene Ontology	GO:0070374	5	40	0.00056593	0.0060786	P42831|B3GDZ4|Q6YST0|Q711P4|F1RQD6	http://amigo.geneontology.org/cgi-bin/amigo/term_details?term=GO:0070374
tumor necrosis factor-mediated signaling pathway	Gene Ontology	GO:0033209	4	22	0.000589559	0.00630375	Q8SQ34|Q764M5|O77736|P23563	http://amigo.geneontology.org/cgi-bin/amigo/term_details?term=GO:0033209
receptor binding	Gene Ontology	GO:0005102	18	488	0.000624004	0.00661724	Q8MJ80|P17803|P01025|C7F842|B0FYK2|Q95253|P42831|E7CR04|P23563|A0MTC9|A5D9J7|B3GDZ4|Q711P4|A5D9J3|A5LHG2|M4M653|F1SBG3|Q5S1V9	http://amigo.geneontology.org/cgi-bin/amigo/term_details?term=GO:0005102
positive regulation of leukocyte migration	Gene Ontology	GO:0002687	5	41	0.000627279	0.00661724	P42831|B3GDZ4|Q6YST0|I3LQ14|B0FYK2	http://amigo.geneontology.org/cgi-bin/amigo/term_details?term=GO:0002687
regulation of leukocyte chemotaxis	Gene Ontology	GO:0002688	5	41	0.000627279	0.00661724	P42831|B3GDZ4|Q6YST0|I3LQ14|B0FYK2	http://amigo.geneontology.org/cgi-bin/amigo/term_details?term=GO:0002688
core promoter proximal region sequence-specific DNA binding	Gene Ontology	GO:0000987	7	90	0.000662676	0.00694414	A0FIN4|O97930|Q19S50|E7CR02|D2KC06|A0A140TAJ8|I3LV04	http://amigo.geneontology.org/cgi-bin/amigo/term_details?term=GO:0000987
defense response to other organism	Gene Ontology	GO:0098542	10	182	0.000670486	0.00699496	Q8SQ34|P17803|Q8MJ80|A0FIN4|B0FYK2|P23563|D2KC06|Q66UW5|I3LV04|F1RQD6	http://amigo.geneontology.org/cgi-bin/amigo/term_details?term=GO:0098542
negative regulation of T cell proliferation	Gene Ontology	GO:0042130	3	9	0.000684205	0.00704478	F1RQD6|Q4QTK1|F1SUN4	http://amigo.geneontology.org/cgi-bin/amigo/term_details?term=GO:0042130
antigen processing and presentation of exogenous antigen	Gene Ontology	GO:0019884	3	9	0.000684205	0.00704478	A5D9J7|A5D9J3|B3SP85	http://amigo.geneontology.org/cgi-bin/amigo/term_details?term=GO:0019884
regulation of mononuclear cell migration	Gene Ontology	GO:0071675	3	9	0.000684205	0.00704478	P42831|B3GDZ4|I3LQ14	http://amigo.geneontology.org/cgi-bin/amigo/term_details?term=GO:0071675
negative regulation of cell adhesion	Gene Ontology	GO:0007162	5	42	0.000693483	0.00710933	D2KC06|F1RQD6|A0FIN4|Q4QTK1|F1SUN4	http://amigo.geneontology.org/cgi-bin/amigo/term_details?term=GO:0007162
core promoter proximal region DNA binding	Gene Ontology	GO:0001159	7	91	0.000704746	0.00717808	A0FIN4|O97930|Q19S50|E7CR02|D2KC06|A0A140TAJ8|I3LV04	http://amigo.geneontology.org/cgi-bin/amigo/term_details?term=GO:0001159
immune system development	Gene Ontology	GO:0002520	12	255	0.00073794	0.00748391	Q8SQ34|P17803|Q6YST0|A0FIN4|F1STZ3|F1RTH8|P23563|F1SUN4|D2KC06|I3LV04|F1RQD6|Q5S1V9	http://amigo.geneontology.org/cgi-bin/amigo/term_details?term=GO:0002520
positive regulation of multicellular organismal process	Gene Ontology	GO:0051240	15	372	0.00076573	0.00773256	Q8SQ34|F1SV36|Q6YST0|A0FIN4|P17803|F1RTH8|P23563|I3LQ14|A7BG67|D2KC06|I3LUA0|A0ZVR0|F1RQD6|Q4QTK1|Q5S1V9	http://amigo.geneontology.org/cgi-bin/amigo/term_details?term=GO:0051240
positive regulation of hydrolase activity	Gene Ontology	GO:0051345	10	186	0.000786696	0.0078633	Q8SQ34|P17803|P42831|I3LEA2|P23563|B3GDZ4|Q711P4|Q64L94|Q764M5|Q863Z0	http://amigo.geneontology.org/cgi-bin/amigo/term_details?term=GO:0051345
lipase activity	Gene Ontology	GO:0016298	4	24	0.000788659	0.0078633	I3LUA0|F1S2T7|Q6YST0|F1SUN4	http://amigo.geneontology.org/cgi-bin/amigo/term_details?term=GO:0016298
lipid storage	Gene Ontology	GO:0019915	4	24	0.000788659	0.0078633	F1SEU0|F1S0V6|P23563|P01025	http://amigo.geneontology.org/cgi-bin/amigo/term_details?term=GO:0019915
regulation of cell differentiation	Gene Ontology	GO:0045595	15	374	0.000807295	0.00799848	P17803|Q6YST0|A0FIN4|F1S628|B0FYK2|F1STZ3|F1SEU0|Q19S50|P23563|F1RTH8|E7CR02|D2KC06|Q8MJD6|Q764M5|Q5S1V9	http://amigo.geneontology.org/cgi-bin/amigo/term_details?term=GO:0045595
positive regulation of MAPK cascade	Gene Ontology	GO:0043410	8	123	0.000837062	0.00825878	Q8SQ34|Q6YST0|O77736|P42831|P23563|B3GDZ4|Q711P4|F1RQD6	http://amigo.geneontology.org/cgi-bin/amigo/term_details?term=GO:0043410
positive regulation of catalytic activity	Gene Ontology	GO:0043085	14	337	0.000874581	0.008497	Q8SQ34|P17803|C7F842|P42831|E7CR04|I3LEA2|P23563|B3GDZ4|Q711P4|F1SCJ8|Q64L94|F1S0V6|Q764M5|Q863Z0	http://amigo.geneontology.org/cgi-bin/amigo/term_details?term=GO:0043085
mononuclear cell migration	Gene Ontology	GO:0071674	3	10	0.000879604	0.008497	P42831|B3GDZ4|I3LQ14	http://amigo.geneontology.org/cgi-bin/amigo/term_details?term=GO:0071674
antigen processing and presentation of peptide or polysaccharide antigen via MHC class II	Gene Ontology	GO:0002504	3	10	0.000879604	0.008497	A5D9L3|Q9BEA4|B3SP85	http://amigo.geneontology.org/cgi-bin/amigo/term_details?term=GO:0002504
temperature homeostasis	Gene Ontology	GO:0001659	3	10	0.000879604	0.008497	Q19S50|P23563|E7CR02	http://amigo.geneontology.org/cgi-bin/amigo/term_details?term=GO:0001659
cellular extravasation	Gene Ontology	GO:0045123	3	10	0.000879604	0.008497	P42831|B3GDZ4|P23563	http://amigo.geneontology.org/cgi-bin/amigo/term_details?term=GO:0045123
cell-cell adhesion	Gene Ontology	GO:0098609	11	224	0.000882782	0.008497	P17803|A0FIN4|P42831|F1RTH8|P23563|F1SUN4|D2KC06|B3GDZ4|F1RQD6|Q4QTK1|Q5S1V9	http://amigo.geneontology.org/cgi-bin/amigo/term_details?term=GO:0098609
positive regulation of inflammatory response	Gene Ontology	GO:0050729	4	25	0.00090415	0.00866737	P42831|B3GDZ4|Q711P4|P23563	http://amigo.geneontology.org/cgi-bin/amigo/term_details?term=GO:0050729
positive regulation of molecular function	Gene Ontology	GO:0044093	16	420	0.000916096	0.0087464	Q8SQ34|P17803|F1SJ12|C7F842|F1RZR9|P42831|E7CR04|I3LEA2|P23563|B3GDZ4|Q711P4|F1SCJ8|Q64L94|F1S0V6|Q764M5|Q863Z0	http://amigo.geneontology.org/cgi-bin/amigo/term_details?term=GO:0044093
maintenance of location	Gene Ontology	GO:0051235	6	70	0.00101101	0.00961373	P01025|F1RZR9|B0FYK2|F1SEU0|P23563|F1S0V6	http://amigo.geneontology.org/cgi-bin/amigo/term_details?term=GO:0051235
regulation of calcium ion transport	Gene Ontology	GO:0051924	5	47	0.00110581	0.0101991	P42831|B3GDZ4|Q6YST0|F1RZR9|B0FYK2	http://amigo.geneontology.org/cgi-bin/amigo/term_details?term=GO:0051924
regulation of CD4-positive, alpha-beta T cell differentiation	Gene Ontology	GO:0043370	3	11	0.00110709	0.0101991	P17803|F1RTH8|Q5S1V9	http://amigo.geneontology.org/cgi-bin/amigo/term_details?term=GO:0043370
response to protozoan	Gene Ontology	GO:0001562	3	11	0.00110709	0.0101991	Q8SQ34|P17803|I3LV04	http://amigo.geneontology.org/cgi-bin/amigo/term_details?term=GO:0001562
defense response to protozoan	Gene Ontology	GO:0042832	3	11	0.00110709	0.0101991	Q8SQ34|P17803|I3LV04	http://amigo.geneontology.org/cgi-bin/amigo/term_details?term=GO:0042832
positive regulation of monocyte chemotaxis	Gene Ontology	GO:0090026	3	11	0.00110709	0.0101991	P42831|B3GDZ4|Q6YST0	http://amigo.geneontology.org/cgi-bin/amigo/term_details?term=GO:0090026
lymphocyte chemotaxis	Gene Ontology	GO:0048247	3	11	0.00110709	0.0101991	P42831|B3GDZ4|Q711P4	http://amigo.geneontology.org/cgi-bin/amigo/term_details?term=GO:0048247
regulation of CD4-positive, alpha-beta T cell activation	Gene Ontology	GO:2000514	3	11	0.00110709	0.0101991	P17803|F1RTH8|Q5S1V9	http://amigo.geneontology.org/cgi-bin/amigo/term_details?term=GO:2000514
positive regulation of interferon-beta production	Gene Ontology	GO:0032728	3	11	0.00110709	0.0101991	D2KC06|A0ZVR0|A0FIN4	http://amigo.geneontology.org/cgi-bin/amigo/term_details?term=GO:0032728
regulation of peptidase activity	Gene Ontology	GO:0052547	8	129	0.00112091	0.0102862	P01025|O77736|I3LS74|P23563|Q64L94|Q764M5|F1SCC6|Q863Z0	http://amigo.geneontology.org/cgi-bin/amigo/term_details?term=GO:0052547
positive regulation of protein modification process	Gene Ontology	GO:0031401	13	308	0.00116846	0.0103935	Q8SQ34|P17803|P01025|Q6YST0|O77736|P42831|E7CR04|Q8MJ80|P23563|B3GDZ4|Q711P4|F1SCJ8|F1RQD6	http://amigo.geneontology.org/cgi-bin/amigo/term_details?term=GO:0031401
positive regulation of calcium ion transport	Gene Ontology	GO:0051928	4	27	0.00116998	0.0103935	P42831|B3GDZ4|Q6YST0|B0FYK2	http://amigo.geneontology.org/cgi-bin/amigo/term_details?term=GO:0051928
regulation of tumor necrosis factor production	Gene Ontology	GO:0032680	4	27	0.00116998	0.0103935	P17803|A7BG67|F1RTH8|F1RQD6	http://amigo.geneontology.org/cgi-bin/amigo/term_details?term=GO:0032680
tumor necrosis factor production	Gene Ontology	GO:0032640	4	27	0.00116998	0.0103935	P17803|A7BG67|F1RTH8|F1RQD6	http://amigo.geneontology.org/cgi-bin/amigo/term_details?term=GO:0032640
pyridine nucleotide metabolic process	Gene Ontology	GO:0019362	4	27	0.00116998	0.0103935	Q9MZS9|Q19S50|F1S3B7|E7CR02	http://amigo.geneontology.org/cgi-bin/amigo/term_details?term=GO:0019362
nicotinamide nucleotide metabolic process	Gene Ontology	GO:0046496	4	27	0.00116998	0.0103935	Q9MZS9|Q19S50|F1S3B7|E7CR02	http://amigo.geneontology.org/cgi-bin/amigo/term_details?term=GO:0046496
regulation of calcium ion import	Gene Ontology	GO:0090279	4	27	0.00116998	0.0103935	P42831|B3GDZ4|F1RZR9|B0FYK2	http://amigo.geneontology.org/cgi-bin/amigo/term_details?term=GO:0090279
positive regulation of endocytosis	Gene Ontology	GO:0045807	4	27	0.00116998	0.0103935	P42831|B3GDZ4|Q8MJ80|P23563	http://amigo.geneontology.org/cgi-bin/amigo/term_details?term=GO:0045807
positive regulation of chemotaxis	Gene Ontology	GO:0050921	5	48	0.00120629	0.0106361	P42831|B3GDZ4|Q6YST0|I3LQ14|B0FYK2	http://amigo.geneontology.org/cgi-bin/amigo/term_details?term=GO:0050921
myeloid leukocyte differentiation	Gene Ontology	GO:0002573	5	48	0.00120629	0.0106361	I3LV04|P17803|Q6YST0|P23563|F1STZ3	http://amigo.geneontology.org/cgi-bin/amigo/term_details?term=GO:0002573
secretion by cell	Gene Ontology	GO:0032940	10	199	0.00128454	0.0112826	Q8SQ34|F1SV36|Q6YST0|C7F842|P17803|E7CR04|P23563|F1RQD6|Q4QTK1|F1S731	http://amigo.geneontology.org/cgi-bin/amigo/term_details?term=GO:0032940
metal ion homeostasis	Gene Ontology	GO:0055065	8	132	0.00128917	0.0112826	Q8SQ34|Q8MJ80|Q6YST0|C7F842|F1RZR9|B0FYK2|I3LQ14|O77741	http://amigo.geneontology.org/cgi-bin/amigo/term_details?term=GO:0055065
regulation of leukocyte migration	Gene Ontology	GO:0002685	5	49	0.00131337	0.0114386	P42831|B3GDZ4|Q6YST0|I3LQ14|B0FYK2	http://amigo.geneontology.org/cgi-bin/amigo/term_details?term=GO:0002685
regulation of myeloid leukocyte differentiation	Gene Ontology	GO:0002761	4	28	0.00132151	0.0114386	P17803|Q6YST0|P23563|F1STZ3	http://amigo.geneontology.org/cgi-bin/amigo/term_details?term=GO:0002761
pyridine-containing compound metabolic process	Gene Ontology	GO:0072524	4	28	0.00132151	0.0114386	Q9MZS9|Q19S50|F1S3B7|E7CR02	http://amigo.geneontology.org/cgi-bin/amigo/term_details?term=GO:0072524
positive regulation of response to biotic stimulus	Gene Ontology	GO:0002833	3	12	0.00136854	0.0116326	A7BG67|Q7YRL4|F1RQD6	http://amigo.geneontology.org/cgi-bin/amigo/term_details?term=GO:0002833
regulation of alpha-beta T cell differentiation	Gene Ontology	GO:0046637	3	12	0.00136854	0.0116326	P17803|F1RTH8|Q5S1V9	http://amigo.geneontology.org/cgi-bin/amigo/term_details?term=GO:0046637
macrophage chemotaxis	Gene Ontology	GO:0048246	3	12	0.00136854	0.0116326	P42831|B3GDZ4|I3LQ14	http://amigo.geneontology.org/cgi-bin/amigo/term_details?term=GO:0048246
regulation of monocyte chemotaxis	Gene Ontology	GO:0090025	3	12	0.00136854	0.0116326	P42831|B3GDZ4|Q6YST0	http://amigo.geneontology.org/cgi-bin/amigo/term_details?term=GO:0090025
positive regulation of chemokine production	Gene Ontology	GO:0032722	3	12	0.00136854	0.0116326	P17803|F1RQD6|P23563	http://amigo.geneontology.org/cgi-bin/amigo/term_details?term=GO:0032722
protein secretion	Gene Ontology	GO:0009306	7	103	0.00139451	0.0118108	Q8SQ34|F1SV36|P17803|E7CR04|P23563|F1RQD6|Q4QTK1	http://amigo.geneontology.org/cgi-bin/amigo/term_details?term=GO:0009306
cell surface receptor signaling pathway	Gene Ontology	GO:0007166	22	708	0.0014198	0.0119821	Q6YST0|B0FYK2|Q7YRL4|Q863Z5|P17803|A0ZVR0|A0FIN4|P42831|D2KC06|B3GDZ4|Q711P4|Q4QTK1|Q8SQ34|O77736|Q19S50|F1S628|A7BG67|E7CR04|P23563|E7CR02|Q764M5|F1SBG3	http://amigo.geneontology.org/cgi-bin/amigo/term_details?term=GO:0007166
regulation of cell communication	Gene Ontology	GO:0010646	23	756	0.00143922	0.0121028	Q6YST0|B0FYK2|Q7YRL4|A0ZVR0|P17803|P01025|A0FIN4|P42831|I3LEA2|D2KC06|B3GDZ4|Q711P4|Q8SQ34|O77736|F1RZR9|Q19S50|A7BG67|F1RQD6|E7CR04|P23563|E7CR02|Q764M5|F1SBG3	http://amigo.geneontology.org/cgi-bin/amigo/term_details?term=GO:0010646
positive regulation of adaptive immune response based on somatic recombination of immune receptors built from immunoglobulin superfamily domains	Gene Ontology	GO:0002824	4	29	0.00148624	0.0124099	Q8SQ34|P17803|F1RTH8|P23563	http://amigo.geneontology.org/cgi-bin/amigo/term_details?term=GO:0002824
positive regulation of lymphocyte mediated immunity	Gene Ontology	GO:0002708	4	29	0.00148624	0.0124099	Q8SQ34|P17803|F1RTH8|P23563	http://amigo.geneontology.org/cgi-bin/amigo/term_details?term=GO:0002708
regulation of leukocyte mediated immunity	Gene Ontology	GO:0002703	5	51	0.00154838	0.0128832	Q8SQ34|P17803|F1RTH8|F1RQD6|P23563	http://amigo.geneontology.org/cgi-bin/amigo/term_details?term=GO:0002703
regulation of signaling	Gene Ontology	GO:0023051	23	763	0.00162009	0.0134325	Q6YST0|B0FYK2|Q7YRL4|A0ZVR0|P17803|P01025|A0FIN4|P42831|I3LEA2|D2KC06|B3GDZ4|Q711P4|Q8SQ34|O77736|F1RZR9|Q19S50|A7BG67|F1RQD6|E7CR04|P23563|E7CR02|Q764M5|F1SBG3	http://amigo.geneontology.org/cgi-bin/amigo/term_details?term=GO:0023051
positive regulation of adaptive immune response	Gene Ontology	GO:0002821	4	30	0.00166476	0.0135728	Q8SQ34|P17803|F1RTH8|P23563	http://amigo.geneontology.org/cgi-bin/amigo/term_details?term=GO:0002821
single-organism carbohydrate catabolic process	Gene Ontology	GO:0044724	4	30	0.00166476	0.0135728	Q19S50|F1S0V6|F1S3B7|E7CR02	http://amigo.geneontology.org/cgi-bin/amigo/term_details?term=GO:0044724
immunoglobulin production	Gene Ontology	GO:0002377	4	30	0.00166476	0.0135728	Q8SQ34|P17803|F1RTH8|P23563	http://amigo.geneontology.org/cgi-bin/amigo/term_details?term=GO:0002377
antigen processing and presentation of peptide antigen via MHC class I	Gene Ontology	GO:0002474	3	13	0.00166572	0.0135728	A5D9J7|A5D9J3|B3SP85	http://amigo.geneontology.org/cgi-bin/amigo/term_details?term=GO:0002474
regulation of interferon-beta production	Gene Ontology	GO:0032648	3	13	0.00166572	0.0135728	D2KC06|A0ZVR0|A0FIN4	http://amigo.geneontology.org/cgi-bin/amigo/term_details?term=GO:0032648
positive regulation of protein secretion	Gene Ontology	GO:0050714	5	52	0.00167684	0.0136164	F1SV36|F1RQD6|P23563|Q4QTK1|P17803	http://amigo.geneontology.org/cgi-bin/amigo/term_details?term=GO:0050714
carbohydrate catabolic process	Gene Ontology	GO:0016052	4	31	0.00185765	0.015033	Q19S50|F1S0V6|F1S3B7|E7CR02	http://amigo.geneontology.org/cgi-bin/amigo/term_details?term=GO:0016052
regulation of molecular function	Gene Ontology	GO:0065009	22	724	0.0018733	0.0151079	Q8MJ80|B3GDZ4|F1S0V6|Q64L94|F1SCJ8|Q863Z0|P17803|P01025|F1SJ12|P42831|I3LEA2|Q711P4|Q8MJD6|Q8SQ34|C7F842|O77736|F1RZR9|I3LS74|E7CR04|P23563|Q764M5|F1SCC6	http://amigo.geneontology.org/cgi-bin/amigo/term_details?term=GO:0065009
extracellular region	Gene Ontology	GO:0005576	34	1333	0.00198653	0.015782	F2Z575|B0FYK2|Q69DL0|F1SUN4|M4M653|C7F842|Q9TUB5|P17803|P01025|Q95253|P42831|F1STZ3|F1STZ1|F1S2T7|Q711P4|A5LHG2|I3LUA0|Q28989|Q4QTK1|Q8SQ34|Q9TRC7|F1S628|F1RI41|Q8MJ80|F1RQD6|B3SP85|Q5XLD3|Q9BEA4|F1SCC6|P23563|F1S0V6|I3LS74|B3GDZ4|Q5S1V9	http://amigo.geneontology.org/cgi-bin/amigo/term_details?term=GO:0005576
negative regulation of lymphocyte proliferation	Gene Ontology	GO:0050672	3	14	0.0020003	0.015782	F1RQD6|Q4QTK1|F1SUN4	http://amigo.geneontology.org/cgi-bin/amigo/term_details?term=GO:0050672
cellular response to mechanical stimulus	Gene Ontology	GO:0071260	3	14	0.0020003	0.015782	Q8SQ34|D2KC06|A0FIN4	http://amigo.geneontology.org/cgi-bin/amigo/term_details?term=GO:0071260
regulation of interleukin-1 production	Gene Ontology	GO:0032652	3	14	0.0020003	0.015782	F1SV36|F1RQD6|P17803	http://amigo.geneontology.org/cgi-bin/amigo/term_details?term=GO:0032652
interferon-beta production	Gene Ontology	GO:0032608	3	14	0.0020003	0.015782	D2KC06|A0ZVR0|A0FIN4	http://amigo.geneontology.org/cgi-bin/amigo/term_details?term=GO:0032608
negative regulation of mononuclear cell proliferation	Gene Ontology	GO:0032945	3	14	0.0020003	0.015782	F1RQD6|Q4QTK1|F1SUN4	http://amigo.geneontology.org/cgi-bin/amigo/term_details?term=GO:0032945
cellular calcium ion homeostasis	Gene Ontology	GO:0006874	6	81	0.00203847	0.0159765	Q8SQ34|Q6YST0|C7F842|F1RZR9|B0FYK2|I3LQ14	http://amigo.geneontology.org/cgi-bin/amigo/term_details?term=GO:0006874
regulation of metal ion transport	Gene Ontology	GO:0010959	6	81	0.00203847	0.0159765	Q8MJ80|Q6YST0|F1RZR9|P42831|B0FYK2|B3GDZ4	http://amigo.geneontology.org/cgi-bin/amigo/term_details?term=GO:0010959
oxidoreduction coenzyme metabolic process	Gene Ontology	GO:0006733	4	32	0.00206551	0.0161082	Q9MZS9|Q19S50|F1S3B7|E7CR02	http://amigo.geneontology.org/cgi-bin/amigo/term_details?term=GO:0006733
positive regulation of cellular metabolic process	Gene Ontology	GO:0031325	23	782	0.00221281	0.0172002	Q8MJ80|Q6YST0|B0FYK2|Q64L94|F1SCJ8|A0ZVR0|Q863Z0|P17803|P01025|A0FIN4|P42831|D2KC06|B3GDZ4|Q711P4|Q8SQ34|O77736|Q19S50|F1RQD6|E7CR04|P23563|E7CR02|Q764M5|Q5S1V9	http://amigo.geneontology.org/cgi-bin/amigo/term_details?term=GO:0031325
multi-organism process	Gene Ontology	GO:0051704	18	548	0.00222843	0.0172648	Q8SQ34|P17803|Q8MJ80|A0FIN4|O77736|B0FYK2|P42831|Q19S50|P23563|E7CR02|D2KC06|B3GDZ4|A7BG67|Q7YRL4|Q66UW5|O77741|I3LV04|F1RQD6	http://amigo.geneontology.org/cgi-bin/amigo/term_details?term=GO:0051704
calcium ion homeostasis	Gene Ontology	GO:0055074	6	83	0.00228859	0.0175606	Q8SQ34|Q6YST0|C7F842|F1RZR9|B0FYK2|I3LQ14	http://amigo.geneontology.org/cgi-bin/amigo/term_details?term=GO:0055074
regulation of production of molecular mediator of immune response	Gene Ontology	GO:0002700	4	33	0.0022889	0.0175606	Q8SQ34|P17803|F1RTH8|P23563	http://amigo.geneontology.org/cgi-bin/amigo/term_details?term=GO:0002700
positive regulation of leukocyte differentiation	Gene Ontology	GO:1902107	4	33	0.0022889	0.0175606	P17803|Q6YST0|P23563|F1RTH8	http://amigo.geneontology.org/cgi-bin/amigo/term_details?term=GO:1902107
positive regulation of intracellular signal transduction	Gene Ontology	GO:1902533	11	254	0.00231277	0.0176396	Q8SQ34|P17803|Q6YST0|O77736|B0FYK2|P42831|E7CR04|P23563|B3GDZ4|Q711P4|F1RQD6	http://amigo.geneontology.org/cgi-bin/amigo/term_details?term=GO:1902533
chemotaxis	Gene Ontology	GO:0006935	8	146	0.00235905	0.0176396	P17803|Q6YST0|C7F842|B0FYK2|P42831|I3LQ14|B3GDZ4|Q711P4	http://amigo.geneontology.org/cgi-bin/amigo/term_details?term=GO:0006935
regulation of localization	Gene Ontology	GO:0032879	19	597	0.00237215	0.0176396	Q8SQ34|F1SV36|P01025|Q6YST0|F1RZR9|B0FYK2|P17803|P42831|E7CR04|F1SEU0|Q19S50|P23563|E7CR02|I3LQ14|B3GDZ4|Q8MJ80|I3LUA0|F1RQD6|Q4QTK1	http://amigo.geneontology.org/cgi-bin/amigo/term_details?term=GO:0032879
interleukin-1 production	Gene Ontology	GO:0032612	3	15	0.00237384	0.0176396	F1SV36|F1RQD6|P17803	http://amigo.geneontology.org/cgi-bin/amigo/term_details?term=GO:0032612
positive regulation of type I interferon production	Gene Ontology	GO:0032481	3	15	0.00237384	0.0176396	D2KC06|A0ZVR0|A0FIN4	http://amigo.geneontology.org/cgi-bin/amigo/term_details?term=GO:0032481
regulation of toll-like receptor signaling pathway	Gene Ontology	GO:0034121	3	15	0.00237384	0.0176396	D2KC06|A0ZVR0|A0FIN4	http://amigo.geneontology.org/cgi-bin/amigo/term_details?term=GO:0034121
negative regulation of leukocyte proliferation	Gene Ontology	GO:0070664	3	15	0.00237384	0.0176396	F1RQD6|Q4QTK1|F1SUN4	http://amigo.geneontology.org/cgi-bin/amigo/term_details?term=GO:0070664
positive regulation of myeloid leukocyte differentiation	Gene Ontology	GO:0002763	3	15	0.00237384	0.0176396	P17803|Q6YST0|P23563	http://amigo.geneontology.org/cgi-bin/amigo/term_details?term=GO:0002763
positive regulation of immunoglobulin production	Gene Ontology	GO:0002639	3	15	0.00237384	0.0176396	Q8SQ34|P17803|F1RTH8	http://amigo.geneontology.org/cgi-bin/amigo/term_details?term=GO:0002639
positive regulation of phagocytosis	Gene Ontology	GO:0050766	3	15	0.00237384	0.0176396	P42831|B3GDZ4|P23563	http://amigo.geneontology.org/cgi-bin/amigo/term_details?term=GO:0050766
multicellular organismal homeostasis	Gene Ontology	GO:0048871	6	84	0.002422	0.0178292	Q8MJ80|F1RTH8|Q19S50|P23563|E7CR02|C3VML0	http://amigo.geneontology.org/cgi-bin/amigo/term_details?term=GO:0048871
STAT cascade	Gene Ontology	GO:0097696	6	84	0.002422	0.0178292	Q8SQ34|P17803|E7CR04|Q19S50|E7CR02|Q764M5	http://amigo.geneontology.org/cgi-bin/amigo/term_details?term=GO:0097696
JAK-STAT cascade	Gene Ontology	GO:0007259	6	84	0.002422	0.0178292	Q8SQ34|P17803|E7CR04|Q19S50|E7CR02|Q764M5	http://amigo.geneontology.org/cgi-bin/amigo/term_details?term=GO:0007259
regulation of protein metabolic process	Gene Ontology	GO:0051246	22	740	0.00244569	0.0179411	Q8MJ80|Q6YST0|B3GDZ4|Q64L94|F1SCJ8|Q863Z0|P17803|P01025|A0FIN4|P42831|D2KC06|Q711P4|Q8SQ34|O77736|I3LS74|F1RQD6|F1RI41|E7CR04|P23563|Q764M5|F1SCC6|Q5S1V9	http://amigo.geneontology.org/cgi-bin/amigo/term_details?term=GO:0051246
positive regulation of protein phosphorylation	Gene Ontology	GO:0001934	11	256	0.00245238	0.0179411	Q8SQ34|P17803|P01025|Q6YST0|O77736|P42831|E7CR04|P23563|B3GDZ4|Q711P4|F1RQD6	http://amigo.geneontology.org/cgi-bin/amigo/term_details?term=GO:0001934
taxis	Gene Ontology	GO:0042330	8	148	0.00255647	0.0185646	P17803|Q6YST0|C7F842|B0FYK2|P42831|I3LQ14|B3GDZ4|Q711P4	http://amigo.geneontology.org/cgi-bin/amigo/term_details?term=GO:0042330
cation homeostasis	Gene Ontology	GO:0055080	8	148	0.00255647	0.0185646	Q8SQ34|Q8MJ80|Q6YST0|C7F842|F1RZR9|B0FYK2|I3LQ14|O77741	http://amigo.geneontology.org/cgi-bin/amigo/term_details?term=GO:0055080
G-protein coupled receptor binding	Gene Ontology	GO:0001664	6	85	0.00256118	0.0185646	P01025|C7F842|B0FYK2|P42831|B3GDZ4|Q711P4	http://amigo.geneontology.org/cgi-bin/amigo/term_details?term=GO:0001664
positive regulation of phosphate metabolic process	Gene Ontology	GO:0045937	12	298	0.00263482	0.018953	Q8SQ34|P17803|P01025|Q6YST0|O77736|B0FYK2|P42831|E7CR04|P23563|B3GDZ4|Q711P4|F1RQD6	http://amigo.geneontology.org/cgi-bin/amigo/term_details?term=GO:0045937
positive regulation of phosphorus metabolic process	Gene Ontology	GO:0010562	12	298	0.00263482	0.018953	Q8SQ34|P17803|P01025|Q6YST0|O77736|B0FYK2|P42831|E7CR04|P23563|B3GDZ4|Q711P4|F1RQD6	http://amigo.geneontology.org/cgi-bin/amigo/term_details?term=GO:0010562
cellular metal ion homeostasis	Gene Ontology	GO:0006875	7	116	0.00264508	0.0189691	Q8SQ34|Q8MJ80|Q6YST0|C7F842|F1RZR9|B0FYK2|I3LQ14	http://amigo.geneontology.org/cgi-bin/amigo/term_details?term=GO:0006875
plasma membrane part	Gene Ontology	GO:0044459	18	558	0.0026959	0.0192751	Q8SQ34|P17803|Q6YST0|Q9BEA4|O77736|B0FYK2|P23563|A8R080|A7BG67|A5D9L3|Q7YRL4|F1S628|Q9TUB5|C3VML0|F1RQD6|I3LQQ9|Q4QTK1|A2T1K6	http://amigo.geneontology.org/cgi-bin/amigo/term_details?term=GO:0044459
inorganic ion homeostasis	Gene Ontology	GO:0098771	8	150	0.00276663	0.0195768	Q8SQ34|Q8MJ80|Q6YST0|C7F842|F1RZR9|B0FYK2|I3LQ14|O77741	http://amigo.geneontology.org/cgi-bin/amigo/term_details?term=GO:0098771
response to virus	Gene Ontology	GO:0009615	7	117	0.00276851	0.0195768	Q8SQ34|P17803|A0FIN4|B0FYK2|P23563|D2KC06|Q66UW5	http://amigo.geneontology.org/cgi-bin/amigo/term_details?term=GO:0009615
positive regulation of leukocyte mediated immunity	Gene Ontology	GO:0002705	4	35	0.00278457	0.0195768	Q8SQ34|P17803|F1RTH8|P23563	http://amigo.geneontology.org/cgi-bin/amigo/term_details?term=GO:0002705
negative regulation of blood vessel morphogenesis	Gene Ontology	GO:2000181	3	16	0.00278781	0.0195768	P42831|B3GDZ4|Q764M5	http://amigo.geneontology.org/cgi-bin/amigo/term_details?term=GO:2000181
regulation of granulocyte chemotaxis	Gene Ontology	GO:0071622	3	16	0.00278781	0.0195768	P42831|B3GDZ4|I3LQ14	http://amigo.geneontology.org/cgi-bin/amigo/term_details?term=GO:0071622
negative regulation of angiogenesis	Gene Ontology	GO:0016525	3	16	0.00278781	0.0195768	P42831|B3GDZ4|Q764M5	http://amigo.geneontology.org/cgi-bin/amigo/term_details?term=GO:0016525
regulation of ERK1 and ERK2 cascade	Gene Ontology	GO:0070372	5	59	0.00280567	0.0196438	P42831|B3GDZ4|Q6YST0|Q711P4|F1RQD6	http://amigo.geneontology.org/cgi-bin/amigo/term_details?term=GO:0070372
hemopoiesis	Gene Ontology	GO:0030097	10	224	0.00295629	0.0206373	P17803|Q6YST0|A0FIN4|F1STZ3|F1RTH8|P23563|F1SUN4|D2KC06|I3LV04|Q5S1V9	http://amigo.geneontology.org/cgi-bin/amigo/term_details?term=GO:0030097
positive regulation of phosphorylation	Gene Ontology	GO:0042327	11	263	0.00299585	0.0208518	Q8SQ34|P17803|P01025|Q6YST0|O77736|P42831|E7CR04|P23563|B3GDZ4|Q711P4|F1RQD6	http://amigo.geneontology.org/cgi-bin/amigo/term_details?term=GO:0042327
cellular divalent inorganic cation homeostasis	Gene Ontology	GO:0072503	6	88	0.00301494	0.0208618	Q8SQ34|Q6YST0|C7F842|F1RZR9|B0FYK2|I3LQ14	http://amigo.geneontology.org/cgi-bin/amigo/term_details?term=GO:0072503
cellular response to organonitrogen compound	Gene Ontology	GO:0071417	6	88	0.00301494	0.0208618	Q9TRC7|E7CR04|Q19S50|P23563|E7CR02|Q764M5	http://amigo.geneontology.org/cgi-bin/amigo/term_details?term=GO:0071417
regulation of endopeptidase activity	Gene Ontology	GO:0052548	7	119	0.00302859	0.0208951	P01025|O77736|P23563|Q64L94|Q764M5|F1SCC6|Q863Z0	http://amigo.geneontology.org/cgi-bin/amigo/term_details?term=GO:0052548
regulation of transport	Gene Ontology	GO:0051049	15	430	0.00304381	0.0209389	Q8SQ34|F1SV36|P01025|Q6YST0|F1RZR9|P17803|P42831|E7CR04|P23563|B0FYK2|Q8MJ80|Q4QTK1|I3LUA0|F1RQD6|B3GDZ4	http://amigo.geneontology.org/cgi-bin/amigo/term_details?term=GO:0051049
regulation of chemotaxis	Gene Ontology	GO:0050920	5	61	0.00321016	0.0219931	P42831|B3GDZ4|Q6YST0|I3LQ14|B0FYK2	http://amigo.geneontology.org/cgi-bin/amigo/term_details?term=GO:0050920
negative regulation of leukocyte differentiation	Gene Ontology	GO:1902106	3	17	0.00324358	0.0219931	D2KC06|F1STZ3|A0FIN4	http://amigo.geneontology.org/cgi-bin/amigo/term_details?term=GO:1902106
positive regulation of B cell mediated immunity	Gene Ontology	GO:0002714	3	17	0.00324358	0.0219931	Q8SQ34|P17803|P23563	http://amigo.geneontology.org/cgi-bin/amigo/term_details?term=GO:0002714
positive regulation of immunoglobulin mediated immune response	Gene Ontology	GO:0002891	3	17	0.00324358	0.0219931	Q8SQ34|P17803|P23563	http://amigo.geneontology.org/cgi-bin/amigo/term_details?term=GO:0002891
regulation of osteoclast differentiation	Gene Ontology	GO:0045670	3	17	0.00324358	0.0219931	P17803|Q6YST0|P23563	http://amigo.geneontology.org/cgi-bin/amigo/term_details?term=GO:0045670
regulation of inflammatory response	Gene Ontology	GO:0050727	5	62	0.00342743	0.0231732	P42831|F1SV36|Q711P4|P23563|B3GDZ4	http://amigo.geneontology.org/cgi-bin/amigo/term_details?term=GO:0050727
regulation of cell migration	Gene Ontology	GO:0030334	8	156	0.00347904	0.023455	P17803|Q6YST0|B0FYK2|P42831|Q19S50|E7CR02|I3LQ14|B3GDZ4	http://amigo.geneontology.org/cgi-bin/amigo/term_details?term=GO:0030334
proteolysis	Gene Ontology	GO:0006508	16	481	0.00349696	0.0235087	F1SV36|P01025|K7GPM2|O77736|P17803|F1SCC6|P23563|F4ZS20|Q764M5|A5D9J4|Q2PYM7|Q64L94|Q9N2I1|I3LS74|Q9TUB5|Q863Z0	http://amigo.geneontology.org/cgi-bin/amigo/term_details?term=GO:0006508
divalent inorganic cation homeostasis	Gene Ontology	GO:0072507	6	91	0.00352633	0.0236389	Q8SQ34|Q6YST0|C7F842|F1RZR9|B0FYK2|I3LQ14	http://amigo.geneontology.org/cgi-bin/amigo/term_details?term=GO:0072507
RNA polymerase II regulatory region sequence-specific DNA binding	Gene Ontology	GO:0000977	8	157	0.00361048	0.0240665	A0FIN4|O97930|Q19S50|E7CR02|D2KC06|A0A140TAJ8|I3LV04|A0ZVR0	http://amigo.geneontology.org/cgi-bin/amigo/term_details?term=GO:0000977
RNA polymerase II regulatory region DNA binding	Gene Ontology	GO:0001012	8	157	0.00361048	0.0240665	A0FIN4|O97930|Q19S50|E7CR02|D2KC06|A0A140TAJ8|I3LV04|A0ZVR0	http://amigo.geneontology.org/cgi-bin/amigo/term_details?term=GO:0001012
proteasome complex	Gene Ontology	GO:0000502	4	38	0.0036587	0.024251	Q64L94|A5D9J4|Q863Z0|Q2PYM7	http://amigo.geneontology.org/cgi-bin/amigo/term_details?term=GO:0000502
calcium ion import	Gene Ontology	GO:0070509	4	38	0.0036587	0.024251	P42831|B3GDZ4|F1RZR9|B0FYK2	http://amigo.geneontology.org/cgi-bin/amigo/term_details?term=GO:0070509
regulation of catalytic activity	Gene Ontology	GO:0050790	18	575	0.00367917	0.0243185	Q8SQ34|P17803|P01025|C7F842|O77736|P42831|F1SCC6|I3LEA2|P23563|B3GDZ4|Q711P4|E7CR04|Q64L94|F1S0V6|Q764M5|I3LS74|Q863Z0|F1SCJ8	http://amigo.geneontology.org/cgi-bin/amigo/term_details?term=GO:0050790
positive regulation of calcium ion import	Gene Ontology	GO:0090280	3	18	0.00374246	0.0243957	P42831|B3GDZ4|B0FYK2	http://amigo.geneontology.org/cgi-bin/amigo/term_details?term=GO:0090280
lymphocyte migration	Gene Ontology	GO:0072676	3	18	0.00374246	0.0243957	P42831|B3GDZ4|Q711P4	http://amigo.geneontology.org/cgi-bin/amigo/term_details?term=GO:0072676
cellular response to interleukin-1	Gene Ontology	GO:0071347	3	18	0.00374246	0.0243957	P42831|B3GDZ4|Q711P4	http://amigo.geneontology.org/cgi-bin/amigo/term_details?term=GO:0071347
humoral immune response mediated by circulating immunoglobulin	Gene Ontology	GO:0002455	3	18	0.00374246	0.0243957	P01025|Q69DL0|P23563	http://amigo.geneontology.org/cgi-bin/amigo/term_details?term=GO:0002455
regulation of chemokine production	Gene Ontology	GO:0032642	3	18	0.00374246	0.0243957	P17803|F1RQD6|P23563	http://amigo.geneontology.org/cgi-bin/amigo/term_details?term=GO:0032642
RNA polymerase II transcription factor activity, sequence-specific DNA binding	Gene Ontology	GO:0000981	9	196	0.00398456	0.025777	A0FIN4|O97930|Q19S50|E7CR02|D2KC06|A0A140TAJ8|I3LV04|Q764M5|A0ZVR0	http://amigo.geneontology.org/cgi-bin/amigo/term_details?term=GO:0000981
regulation of proteolysis	Gene Ontology	GO:0030162	9	196	0.00398456	0.025777	P17803|P01025|O77736|F1SCC6|P23563|Q64L94|Q764M5|I3LS74|Q863Z0	http://amigo.geneontology.org/cgi-bin/amigo/term_details?term=GO:0030162
protein kinase B signaling	Gene Ontology	GO:0043491	4	39	0.00398709	0.025777	P42831|B3GDZ4|Q8SQ34|P23563	http://amigo.geneontology.org/cgi-bin/amigo/term_details?term=GO:0043491
positive regulation of metabolic process	Gene Ontology	GO:0009893	23	821	0.00402662	0.0259615	Q8MJ80|Q6YST0|B0FYK2|Q64L94|F1SCJ8|A0ZVR0|Q863Z0|P17803|P01025|A0FIN4|P42831|D2KC06|B3GDZ4|Q711P4|Q8SQ34|O77736|Q19S50|F1RQD6|E7CR04|P23563|E7CR02|Q764M5|Q5S1V9	http://amigo.geneontology.org/cgi-bin/amigo/term_details?term=GO:0009893
cellular response to lipid	Gene Ontology	GO:0071396	7	126	0.00408869	0.0262643	P17803|P42831|P23563|B3GDZ4|A7BG67|Q7YRL4|F1RQD6	http://amigo.geneontology.org/cgi-bin/amigo/term_details?term=GO:0071396
single-organism transport	Gene Ontology	GO:0044765	21	724	0.0040958	0.0262643	Q8SQ34|F1SV36|P01025|Q6YST0|C7F842|F1RZR9|P17803|P42831|E7CR04|F1SEU0|Q19S50|P23563|E7CR02|B0FYK2|Q8MJ80|Q4QTK1|I3LUA0|F1RQD6|I3LQQ9|B3GDZ4|F1S731	http://amigo.geneontology.org/cgi-bin/amigo/term_details?term=GO:0044765
positive regulation of macromolecule metabolic process	Gene Ontology	GO:0010604	22	774	0.00416962	0.0266652	Q8MJ80|Q6YST0|B3GDZ4|Q64L94|F1SCJ8|A0ZVR0|Q863Z0|P17803|P01025|A0FIN4|P42831|D2KC06|Q711P4|Q8SQ34|O77736|Q19S50|F1RQD6|E7CR04|P23563|E7CR02|Q764M5|Q5S1V9	http://amigo.geneontology.org/cgi-bin/amigo/term_details?term=GO:0010604
secretion	Gene Ontology	GO:0046903	10	236	0.00422189	0.0269169	Q8SQ34|F1SV36|Q6YST0|C7F842|P17803|E7CR04|P23563|F1RQD6|Q4QTK1|F1S731	http://amigo.geneontology.org/cgi-bin/amigo/term_details?term=GO:0046903
cell migration	Gene Ontology	GO:0016477	11	276	0.0042613	0.0269169	P17803|Q6YST0|C7F842|B0FYK2|P42831|Q19S50|P23563|E7CR02|I3LQ14|B3GDZ4|Q711P4	http://amigo.geneontology.org/cgi-bin/amigo/term_details?term=GO:0016477
negative regulation of vasculature development	Gene Ontology	GO:1901343	3	19	0.00428563	0.0269169	P42831|B3GDZ4|Q764M5	http://amigo.geneontology.org/cgi-bin/amigo/term_details?term=GO:1901343
B cell activation involved in immune response	Gene Ontology	GO:0002312	3	19	0.00428563	0.0269169	Q8SQ34|P17803|Q7YRL4	http://amigo.geneontology.org/cgi-bin/amigo/term_details?term=GO:0002312
ATP generation from ADP	Gene Ontology	GO:0006757	3	19	0.00428563	0.0269169	Q19S50|F1S3B7|E7CR02	http://amigo.geneontology.org/cgi-bin/amigo/term_details?term=GO:0006757
glycolytic process	Gene Ontology	GO:0006096	3	19	0.00428563	0.0269169	Q19S50|F1S3B7|E7CR02	http://amigo.geneontology.org/cgi-bin/amigo/term_details?term=GO:0006096
ERK1 and ERK2 cascade	Gene Ontology	GO:0070371	5	66	0.00440313	0.0269169	P42831|B3GDZ4|Q6YST0|Q711P4|F1RQD6	http://amigo.geneontology.org/cgi-bin/amigo/term_details?term=GO:0070371
regulation of catabolic process	Gene Ontology	GO:0009894	7	128	0.00443783	0.0269169	Q8MJ80|P17803|Q19S50|P23563|E7CR02|Q64L94|Q863Z0	http://amigo.geneontology.org/cgi-bin/amigo/term_details?term=GO:0009894
cellular cation homeostasis	Gene Ontology	GO:0030003	7	128	0.00443783	0.0269169	Q8SQ34|Q8MJ80|Q6YST0|C7F842|F1RZR9|B0FYK2|I3LQ14	http://amigo.geneontology.org/cgi-bin/amigo/term_details?term=GO:0030003
ion homeostasis	Gene Ontology	GO:0050801	8	163	0.00448197	0.0269169	Q8SQ34|Q8MJ80|Q6YST0|C7F842|F1RZR9|B0FYK2|I3LQ14|O77741	http://amigo.geneontology.org/cgi-bin/amigo/term_details?term=GO:0050801
regulation of nitric-oxide synthase biosynthetic process	Gene Ontology	GO:0051769	2	5	0.00458487	0.0269169	P42831|B3GDZ4	http://amigo.geneontology.org/cgi-bin/amigo/term_details?term=GO:0051769
cellular response to growth hormone stimulus	Gene Ontology	GO:0071378	2	5	0.00458487	0.0269169	Q19S50|E7CR02	http://amigo.geneontology.org/cgi-bin/amigo/term_details?term=GO:0071378
positive regulation of steroid biosynthetic process	Gene Ontology	GO:0010893	2	5	0.00458487	0.0269169	P17803|P23563	http://amigo.geneontology.org/cgi-bin/amigo/term_details?term=GO:0010893
positive regulation of nitric-oxide synthase biosynthetic process	Gene Ontology	GO:0051770	2	5	0.00458487	0.0269169	P42831|B3GDZ4	http://amigo.geneontology.org/cgi-bin/amigo/term_details?term=GO:0051770
growth hormone receptor signaling pathway	Gene Ontology	GO:0060396	2	5	0.00458487	0.0269169	Q19S50|E7CR02	http://amigo.geneontology.org/cgi-bin/amigo/term_details?term=GO:0060396
MHC class II protein complex	Gene Ontology	GO:0042613	2	5	0.00458487	0.0269169	A5D9L3|Q9BEA4	http://amigo.geneontology.org/cgi-bin/amigo/term_details?term=GO:0042613
positive regulation of interleukin-1 secretion	Gene Ontology	GO:0050716	2	5	0.00458487	0.0269169	F1SV36|P17803	http://amigo.geneontology.org/cgi-bin/amigo/term_details?term=GO:0050716
regulation of calcidiol 1-monooxygenase activity	Gene Ontology	GO:0060558	2	5	0.00458487	0.0269169	P17803|P23563	http://amigo.geneontology.org/cgi-bin/amigo/term_details?term=GO:0060558
positive regulation of membrane protein ectodomain proteolysis	Gene Ontology	GO:0051044	2	5	0.00458487	0.0269169	P17803|P23563	http://amigo.geneontology.org/cgi-bin/amigo/term_details?term=GO:0051044
alpha-beta T cell proliferation	Gene Ontology	GO:0046633	2	5	0.00458487	0.0269169	D2KC06|A0FIN4	http://amigo.geneontology.org/cgi-bin/amigo/term_details?term=GO:0046633
nitric-oxide synthase biosynthetic process	Gene Ontology	GO:0051767	2	5	0.00458487	0.0269169	P42831|B3GDZ4	http://amigo.geneontology.org/cgi-bin/amigo/term_details?term=GO:0051767
regulation of alpha-beta T cell proliferation	Gene Ontology	GO:0046640	2	5	0.00458487	0.0269169	D2KC06|A0FIN4	http://amigo.geneontology.org/cgi-bin/amigo/term_details?term=GO:0046640
regulation of glycolytic process	Gene Ontology	GO:0006110	2	5	0.00458487	0.0269169	Q19S50|E7CR02	http://amigo.geneontology.org/cgi-bin/amigo/term_details?term=GO:0006110
vitamin D biosynthetic process	Gene Ontology	GO:0042368	2	5	0.00458487	0.0269169	P17803|P23563	http://amigo.geneontology.org/cgi-bin/amigo/term_details?term=GO:0042368
radial glial cell differentiation	Gene Ontology	GO:0060019	2	5	0.00458487	0.0269169	Q19S50|E7CR02	http://amigo.geneontology.org/cgi-bin/amigo/term_details?term=GO:0060019
positive regulation of interleukin-1 beta secretion	Gene Ontology	GO:0050718	2	5	0.00458487	0.0269169	F1SV36|P17803	http://amigo.geneontology.org/cgi-bin/amigo/term_details?term=GO:0050718
regulation of vitamin D biosynthetic process	Gene Ontology	GO:0060556	2	5	0.00458487	0.0269169	P17803|P23563	http://amigo.geneontology.org/cgi-bin/amigo/term_details?term=GO:0060556
antigen processing and presentation via MHC class Ib	Gene Ontology	GO:0002475	2	5	0.00458487	0.0269169	A5D9J7|A5D9J3	http://amigo.geneontology.org/cgi-bin/amigo/term_details?term=GO:0002475
positive regulation of interleukin-4 production	Gene Ontology	GO:0032753	2	5	0.00458487	0.0269169	F1RTH8|F1RQD6	http://amigo.geneontology.org/cgi-bin/amigo/term_details?term=GO:0032753
response to interleukin-6	Gene Ontology	GO:0070741	2	5	0.00458487	0.0269169	Q19S50|E7CR02	http://amigo.geneontology.org/cgi-bin/amigo/term_details?term=GO:0070741
positive regulation of tyrosine phosphorylation of Stat1 protein	Gene Ontology	GO:0042511	2	5	0.00458487	0.0269169	Q8SQ34|P17803	http://amigo.geneontology.org/cgi-bin/amigo/term_details?term=GO:0042511
endopeptidase activator activity	Gene Ontology	GO:0061133	2	5	0.00458487	0.0269169	Q64L94|Q863Z0	http://amigo.geneontology.org/cgi-bin/amigo/term_details?term=GO:0061133
regulation of vitamin metabolic process	Gene Ontology	GO:0030656	2	5	0.00458487	0.0269169	P17803|P23563	http://amigo.geneontology.org/cgi-bin/amigo/term_details?term=GO:0030656
positive regulation of endopeptidase activity	Gene Ontology	GO:0010950	4	41	0.00470258	0.0275054	Q64L94|Q764M5|P23563|Q863Z0	http://amigo.geneontology.org/cgi-bin/amigo/term_details?term=GO:0010950
cellular chemical homeostasis	Gene Ontology	GO:0055082	8	165	0.00480584	0.0279898	Q8SQ34|Q8MJ80|Q6YST0|C7F842|F1RZR9|B0FYK2|F1S3B7|I3LQ14	http://amigo.geneontology.org/cgi-bin/amigo/term_details?term=GO:0055082
response to organonitrogen compound	Gene Ontology	GO:0010243	7	130	0.00480908	0.0279898	Q9TRC7|E7CR04|Q19S50|P23563|E7CR02|Q764M5|A8R080	http://amigo.geneontology.org/cgi-bin/amigo/term_details?term=GO:0010243
chemokine production	Gene Ontology	GO:0032602	3	20	0.00487421	0.0282991	P17803|F1RQD6|P23563	http://amigo.geneontology.org/cgi-bin/amigo/term_details?term=GO:0032602
positive regulation of cell migration	Gene Ontology	GO:0030335	6	98	0.00496805	0.0286693	P17803|Q6YST0|B0FYK2|P42831|I3LQ14|B3GDZ4	http://amigo.geneontology.org/cgi-bin/amigo/term_details?term=GO:0030335
regulation of cell motility	Gene Ontology	GO:2000145	8	166	0.00497437	0.0286693	P17803|Q6YST0|B0FYK2|P42831|Q19S50|E7CR02|I3LQ14|B3GDZ4	http://amigo.geneontology.org/cgi-bin/amigo/term_details?term=GO:2000145
negative regulation of cell differentiation	Gene Ontology	GO:0045596	8	166	0.00497437	0.0286693	A0FIN4|F1STZ3|Q19S50|P23563|E7CR02|D2KC06|Q8MJD6|Q764M5	http://amigo.geneontology.org/cgi-bin/amigo/term_details?term=GO:0045596
hematopoietic or lymphoid organ development	Gene Ontology	GO:0048534	10	242	0.00499826	0.0287369	P17803|Q6YST0|A0FIN4|F1STZ3|F1RTH8|P23563|F1SUN4|D2KC06|I3LV04|Q5S1V9	http://amigo.geneontology.org/cgi-bin/amigo/term_details?term=GO:0048534
cellular ion homeostasis	Gene Ontology	GO:0006873	7	132	0.00520332	0.0298433	Q8SQ34|Q8MJ80|Q6YST0|C7F842|F1RZR9|B0FYK2|I3LQ14	http://amigo.geneontology.org/cgi-bin/amigo/term_details?term=GO:0006873
MAPK cascade	Gene Ontology	GO:0000165	9	205	0.00527202	0.0301641	Q8SQ34|Q6YST0|O77736|P42831|P23563|B3GDZ4|Q711P4|O77741|F1RQD6	http://amigo.geneontology.org/cgi-bin/amigo/term_details?term=GO:0000165
apoptotic process	Gene Ontology	GO:0006915	15	458	0.00536671	0.0306317	Q8SQ34|F1SV36|A0FIN4|O77736|P17803|P42831|Q19S50|P23563|E7CR02|D2KC06|B3GDZ4|F1SBR1|Q9N2I1|Q764M5|Q4QTK1	http://amigo.geneontology.org/cgi-bin/amigo/term_details?term=GO:0006915
positive regulation of leukocyte proliferation	Gene Ontology	GO:0070665	4	43	0.00549975	0.0308126	Q8SQ34|P17803|F1RTH8|F1RQD6	http://amigo.geneontology.org/cgi-bin/amigo/term_details?term=GO:0070665
positive regulation of lymphocyte proliferation	Gene Ontology	GO:0050671	4	43	0.00549975	0.0308126	Q8SQ34|P17803|F1RTH8|F1RQD6	http://amigo.geneontology.org/cgi-bin/amigo/term_details?term=GO:0050671
positive regulation of mononuclear cell proliferation	Gene Ontology	GO:0032946	4	43	0.00549975	0.0308126	Q8SQ34|P17803|F1RTH8|F1RQD6	http://amigo.geneontology.org/cgi-bin/amigo/term_details?term=GO:0032946
regulation of B cell mediated immunity	Gene Ontology	GO:0002712	3	21	0.00550923	0.0308126	Q8SQ34|P17803|P23563	http://amigo.geneontology.org/cgi-bin/amigo/term_details?term=GO:0002712
regulation of immunoglobulin mediated immune response	Gene Ontology	GO:0002889	3	21	0.00550923	0.0308126	Q8SQ34|P17803|P23563	http://amigo.geneontology.org/cgi-bin/amigo/term_details?term=GO:0002889
response to interleukin-1	Gene Ontology	GO:0070555	3	21	0.00550923	0.0308126	P42831|B3GDZ4|Q711P4	http://amigo.geneontology.org/cgi-bin/amigo/term_details?term=GO:0070555
osteoclast differentiation	Gene Ontology	GO:0030316	3	21	0.00550923	0.0308126	P17803|Q6YST0|P23563	http://amigo.geneontology.org/cgi-bin/amigo/term_details?term=GO:0030316
regulation of smooth muscle cell proliferation	Gene Ontology	GO:0048660	3	21	0.00550923	0.0308126	P17803|Q764M5|P23563	http://amigo.geneontology.org/cgi-bin/amigo/term_details?term=GO:0048660
programmed cell death	Gene Ontology	GO:0012501	15	462	0.00579304	0.0323234	Q8SQ34|F1SV36|A0FIN4|O77736|P17803|P42831|Q19S50|P23563|E7CR02|D2KC06|B3GDZ4|F1SBR1|Q9N2I1|Q764M5|Q4QTK1	http://amigo.geneontology.org/cgi-bin/amigo/term_details?term=GO:0012501
positive regulation of peptidase activity	Gene Ontology	GO:0010952	4	44	0.0059302	0.0325785	Q64L94|Q764M5|P23563|Q863Z0	http://amigo.geneontology.org/cgi-bin/amigo/term_details?term=GO:0010952
fat-soluble vitamin biosynthetic process	Gene Ontology	GO:0042362	2	6	0.00605246	0.0325785	P17803|P23563	http://amigo.geneontology.org/cgi-bin/amigo/term_details?term=GO:0042362
sphingolipid catabolic process	Gene Ontology	GO:0030149	2	6	0.00605246	0.0325785	F1S2T7|F1S0V6	http://amigo.geneontology.org/cgi-bin/amigo/term_details?term=GO:0030149
positive regulation of endothelial cell apoptotic process	Gene Ontology	GO:2000353	2	6	0.00605246	0.0325785	Q8SQ34|P23563	http://amigo.geneontology.org/cgi-bin/amigo/term_details?term=GO:2000353
response to growth hormone	Gene Ontology	GO:0060416	2	6	0.00605246	0.0325785	Q19S50|E7CR02	http://amigo.geneontology.org/cgi-bin/amigo/term_details?term=GO:0060416
regulation of antigen processing and presentation	Gene Ontology	GO:0002577	2	6	0.00605246	0.0325785	A5D9J7|A5D9J3	http://amigo.geneontology.org/cgi-bin/amigo/term_details?term=GO:0002577
positive regulation of lipid storage	Gene Ontology	GO:0010884	2	6	0.00605246	0.0325785	F1SEU0|P01025	http://amigo.geneontology.org/cgi-bin/amigo/term_details?term=GO:0010884
glial cell migration	Gene Ontology	GO:0008347	2	6	0.00605246	0.0325785	P42831|B3GDZ4	http://amigo.geneontology.org/cgi-bin/amigo/term_details?term=GO:0008347
RNA polymerase II repressing transcription factor binding	Gene Ontology	GO:0001103	2	6	0.00605246	0.0325785	Q19S50|E7CR02	http://amigo.geneontology.org/cgi-bin/amigo/term_details?term=GO:0001103
membrane lipid catabolic process	Gene Ontology	GO:0046466	2	6	0.00605246	0.0325785	F1S2T7|F1S0V6	http://amigo.geneontology.org/cgi-bin/amigo/term_details?term=GO:0046466
MHC protein binding	Gene Ontology	GO:0042287	2	6	0.00605246	0.0325785	A5D9J7|A5D9J3	http://amigo.geneontology.org/cgi-bin/amigo/term_details?term=GO:0042287
leptin-mediated signaling pathway	Gene Ontology	GO:0033210	2	6	0.00605246	0.0325785	Q19S50|E7CR02	http://amigo.geneontology.org/cgi-bin/amigo/term_details?term=GO:0033210
negative regulation of neuron migration	Gene Ontology	GO:2001223	2	6	0.00605246	0.0325785	Q19S50|E7CR02	http://amigo.geneontology.org/cgi-bin/amigo/term_details?term=GO:2001223
positive regulation of interleukin-1 beta production	Gene Ontology	GO:0032731	2	6	0.00605246	0.0325785	F1SV36|P17803	http://amigo.geneontology.org/cgi-bin/amigo/term_details?term=GO:0032731
negative regulation of interferon-gamma production	Gene Ontology	GO:0032689	2	6	0.00605246	0.0325785	F1RQD6|Q4QTK1	http://amigo.geneontology.org/cgi-bin/amigo/term_details?term=GO:0032689
ADP metabolic process	Gene Ontology	GO:0046031	3	22	0.00619166	0.0331766	Q19S50|F1S3B7|E7CR02	http://amigo.geneontology.org/cgi-bin/amigo/term_details?term=GO:0046031
smooth muscle cell proliferation	Gene Ontology	GO:0048659	3	22	0.00619166	0.0331766	P17803|Q764M5|P23563	http://amigo.geneontology.org/cgi-bin/amigo/term_details?term=GO:0048659
regulation of locomotion	Gene Ontology	GO:0040012	8	173	0.00628451	0.033598	P17803|Q6YST0|B0FYK2|P42831|Q19S50|E7CR02|I3LQ14|B3GDZ4	http://amigo.geneontology.org/cgi-bin/amigo/term_details?term=GO:0040012
organic substance catabolic process	Gene Ontology	GO:1901575	15	467	0.00636418	0.0339471	Q8MJ80|P17803|F4ZS20|Q9MZS9|Q19S50|P23563|F1S3B7|F1SUN4|F1S2T7|A5D9J4|F1S0V6|Q2PYM7|Q64L94|E7CR02|Q863Z0	http://amigo.geneontology.org/cgi-bin/amigo/term_details?term=GO:1901575
positive regulation of ion transport	Gene Ontology	GO:0043270	4	45	0.00638254	0.0339683	P42831|B3GDZ4|Q6YST0|B0FYK2	http://amigo.geneontology.org/cgi-bin/amigo/term_details?term=GO:0043270
regulation of biological quality	Gene Ontology	GO:0065008	23	855	0.00650641	0.0345148	Q8MJ80|Q6YST0|B0FYK2|F1S3B7|F1S0V6|O77741|F1S731|P17803|P01025|P42831|B3GDZ4|I3LUA0|C3VML0|Q8SQ34|F1RTH8|C7F842|F1RZR9|F1SEU0|Q19S50|B3SP85|P23563|E7CR02|I3LQ14	http://amigo.geneontology.org/cgi-bin/amigo/term_details?term=GO:0065008
defense response to virus	Gene Ontology	GO:0051607	6	104	0.00651442	0.0345148	Q8SQ34|P17803|A0FIN4|B0FYK2|D2KC06|Q66UW5	http://amigo.geneontology.org/cgi-bin/amigo/term_details?term=GO:0051607
positive regulation of cell motility	Gene Ontology	GO:2000147	6	105	0.00680268	0.0358718	P17803|Q6YST0|B0FYK2|P42831|I3LQ14|B3GDZ4	http://amigo.geneontology.org/cgi-bin/amigo/term_details?term=GO:2000147
regulation of muscle cell differentiation	Gene Ontology	GO:0051147	4	46	0.00685722	0.0358718	B0FYK2|F1S628|Q8MJD6|P23563	http://amigo.geneontology.org/cgi-bin/amigo/term_details?term=GO:0051147
positive regulation of multi-organism process	Gene Ontology	GO:0043902	4	46	0.00685722	0.0358718	P17803|A7BG67|Q7YRL4|F1RQD6	http://amigo.geneontology.org/cgi-bin/amigo/term_details?term=GO:0043902
production of molecular mediator of immune response	Gene Ontology	GO:0002440	4	46	0.00685722	0.0358718	Q8SQ34|P17803|F1RTH8|P23563	http://amigo.geneontology.org/cgi-bin/amigo/term_details?term=GO:0002440
negative regulation of cytokine production	Gene Ontology	GO:0001818	4	46	0.00685722	0.0358718	P17803|F1RQD6|P23563|Q4QTK1	http://amigo.geneontology.org/cgi-bin/amigo/term_details?term=GO:0001818
purine ribonucleoside diphosphate metabolic process	Gene Ontology	GO:0009179	3	23	0.00692237	0.0358718	Q19S50|F1S3B7|E7CR02	http://amigo.geneontology.org/cgi-bin/amigo/term_details?term=GO:0009179
regulation of tyrosine phosphorylation of STAT protein	Gene Ontology	GO:0042509	3	23	0.00692237	0.0358718	Q8SQ34|P17803|E7CR04	http://amigo.geneontology.org/cgi-bin/amigo/term_details?term=GO:0042509
ribonucleoside diphosphate metabolic process	Gene Ontology	GO:0009185	3	23	0.00692237	0.0358718	Q19S50|F1S3B7|E7CR02	http://amigo.geneontology.org/cgi-bin/amigo/term_details?term=GO:0009185
vitamin metabolic process	Gene Ontology	GO:0006766	3	23	0.00692237	0.0358718	P17803|P23563|Q9BDJ5	http://amigo.geneontology.org/cgi-bin/amigo/term_details?term=GO:0006766
purine nucleoside diphosphate metabolic process	Gene Ontology	GO:0009135	3	23	0.00692237	0.0358718	Q19S50|F1S3B7|E7CR02	http://amigo.geneontology.org/cgi-bin/amigo/term_details?term=GO:0009135
regulation of apoptotic process	Gene Ontology	GO:0042981	13	382	0.00698516	0.036118	Q8SQ34|F1SV36|O77736|P17803|P42831|Q19S50|P23563|E7CR02|B3GDZ4|F1SBR1|Q9N2I1|Q764M5|Q4QTK1	http://amigo.geneontology.org/cgi-bin/amigo/term_details?term=GO:0042981
regulation of programmed cell death	Gene Ontology	GO:0043067	13	384	0.00727666	0.0373966	Q8SQ34|F1SV36|O77736|P17803|P42831|Q19S50|P23563|E7CR02|B3GDZ4|F1SBR1|Q9N2I1|Q764M5|Q4QTK1	http://amigo.geneontology.org/cgi-bin/amigo/term_details?term=GO:0043067
extracellular region part	Gene Ontology	GO:0044421	28	1123	0.00728271	0.0373966	F2Z575|B0FYK2|M4M653|C7F842|Q9TUB5|P17803|P01025|Q95253|P42831|F1STZ3|F1S2T7|Q711P4|I3LUA0|Q4QTK1|Q8SQ34|Q9TRC7|F1S628|F1RI41|Q8MJ80|F1RQD6|Q28989|Q5XLD3|Q9BEA4|P23563|F1S0V6|F1SCC6|B3GDZ4|Q5S1V9	http://amigo.geneontology.org/cgi-bin/amigo/term_details?term=GO:0044421
transcription regulatory region sequence-specific DNA binding	Gene Ontology	GO:0000976	8	178	0.00737027	0.0373966	A0FIN4|O97930|Q19S50|E7CR02|D2KC06|A0A140TAJ8|I3LV04|A0ZVR0	http://amigo.geneontology.org/cgi-bin/amigo/term_details?term=GO:0000976
cell motility	Gene Ontology	GO:0048870	11	299	0.00751747	0.0373966	P17803|Q6YST0|C7F842|B0FYK2|P42831|Q19S50|P23563|E7CR02|I3LQ14|B3GDZ4|Q711P4	http://amigo.geneontology.org/cgi-bin/amigo/term_details?term=GO:0048870
localization of cell	Gene Ontology	GO:0051674	11	299	0.00751747	0.0373966	P17803|Q6YST0|C7F842|B0FYK2|P42831|Q19S50|P23563|E7CR02|I3LQ14|B3GDZ4|Q711P4	http://amigo.geneontology.org/cgi-bin/amigo/term_details?term=GO:0051674
cell adhesion	Gene Ontology	GO:0007155	12	342	0.00755545	0.0373966	P17803|A0FIN4|P42831|F1RTH8|P23563|A8R080|D2KC06|B3GDZ4|F1SUN4|F1RQD6|Q4QTK1|Q5S1V9	http://amigo.geneontology.org/cgi-bin/amigo/term_details?term=GO:0007155
positive regulation of production of molecular mediator of immune response	Gene Ontology	GO:0002702	3	24	0.00770216	0.0373966	Q8SQ34|P17803|F1RTH8	http://amigo.geneontology.org/cgi-bin/amigo/term_details?term=GO:0002702
regulation of phagocytosis	Gene Ontology	GO:0050764	3	24	0.00770216	0.0373966	P42831|B3GDZ4|P23563	http://amigo.geneontology.org/cgi-bin/amigo/term_details?term=GO:0050764
vitamin D metabolic process	Gene Ontology	GO:0042359	2	7	0.00770455	0.0373966	P17803|P23563	http://amigo.geneontology.org/cgi-bin/amigo/term_details?term=GO:0042359
cellular response to leptin stimulus	Gene Ontology	GO:0044320	2	7	0.00770455	0.0373966	Q19S50|E7CR02	http://amigo.geneontology.org/cgi-bin/amigo/term_details?term=GO:0044320
positive regulation of isotype switching to IgG isotypes	Gene Ontology	GO:0048304	2	7	0.00770455	0.0373966	Q8SQ34|P17803	http://amigo.geneontology.org/cgi-bin/amigo/term_details?term=GO:0048304
negative regulation of leukocyte migration	Gene Ontology	GO:0002686	2	7	0.00770455	0.0373966	P42831|B3GDZ4	http://amigo.geneontology.org/cgi-bin/amigo/term_details?term=GO:0002686
positive regulation of nitric oxide biosynthetic process	Gene Ontology	GO:0045429	2	7	0.00770455	0.0373966	P17803|P23563	http://amigo.geneontology.org/cgi-bin/amigo/term_details?term=GO:0045429
negative regulation of cellular carbohydrate metabolic process	Gene Ontology	GO:0010677	2	7	0.00770455	0.0373966	Q19S50|E7CR02	http://amigo.geneontology.org/cgi-bin/amigo/term_details?term=GO:0010677
regulation of interleukin-1 beta secretion	Gene Ontology	GO:0050706	2	7	0.00770455	0.0373966	F1SV36|P17803	http://amigo.geneontology.org/cgi-bin/amigo/term_details?term=GO:0050706
isotype switching to IgG isotypes	Gene Ontology	GO:0048291	2	7	0.00770455	0.0373966	Q8SQ34|P17803	http://amigo.geneontology.org/cgi-bin/amigo/term_details?term=GO:0048291
regulation of isotype switching to IgG isotypes	Gene Ontology	GO:0048302	2	7	0.00770455	0.0373966	Q8SQ34|P17803	http://amigo.geneontology.org/cgi-bin/amigo/term_details?term=GO:0048302
regulation of interleukin-1 secretion	Gene Ontology	GO:0050704	2	7	0.00770455	0.0373966	F1SV36|P17803	http://amigo.geneontology.org/cgi-bin/amigo/term_details?term=GO:0050704
response to leptin	Gene Ontology	GO:0044321	2	7	0.00770455	0.0373966	Q19S50|E7CR02	http://amigo.geneontology.org/cgi-bin/amigo/term_details?term=GO:0044321
regulation of carbohydrate catabolic process	Gene Ontology	GO:0043470	2	7	0.00770455	0.0373966	Q19S50|E7CR02	http://amigo.geneontology.org/cgi-bin/amigo/term_details?term=GO:0043470
positive regulation of nitric oxide metabolic process	Gene Ontology	GO:1904407	2	7	0.00770455	0.0373966	P17803|P23563	http://amigo.geneontology.org/cgi-bin/amigo/term_details?term=GO:1904407
positive regulation of CD4-positive, alpha-beta T cell differentiation	Gene Ontology	GO:0043372	2	7	0.00770455	0.0373966	P17803|F1RTH8	http://amigo.geneontology.org/cgi-bin/amigo/term_details?term=GO:0043372
positive regulation of CD4-positive, alpha-beta T cell activation	Gene Ontology	GO:2000516	2	7	0.00770455	0.0373966	P17803|F1RTH8	http://amigo.geneontology.org/cgi-bin/amigo/term_details?term=GO:2000516
type I interferon signaling pathway	Gene Ontology	GO:0060337	2	7	0.00770455	0.0373966	Q764M5|A0ZVR0	http://amigo.geneontology.org/cgi-bin/amigo/term_details?term=GO:0060337
immunological synapse	Gene Ontology	GO:0001772	2	7	0.00770455	0.0373966	F1S628|F1RQD6	http://amigo.geneontology.org/cgi-bin/amigo/term_details?term=GO:0001772
regulation of lymphocyte chemotaxis	Gene Ontology	GO:1901623	2	7	0.00770455	0.0373966	P42831|B3GDZ4	http://amigo.geneontology.org/cgi-bin/amigo/term_details?term=GO:1901623
regulation of interleukin-4 production	Gene Ontology	GO:0032673	2	7	0.00770455	0.0373966	F1RTH8|F1RQD6	http://amigo.geneontology.org/cgi-bin/amigo/term_details?term=GO:0032673
positive regulation of epithelial cell apoptotic process	Gene Ontology	GO:1904037	2	7	0.00770455	0.0373966	Q8SQ34|P23563	http://amigo.geneontology.org/cgi-bin/amigo/term_details?term=GO:1904037
regulation of lipopolysaccharide-mediated signaling pathway	Gene Ontology	GO:0031664	2	7	0.00770455	0.0373966	A7BG67|Q7YRL4	http://amigo.geneontology.org/cgi-bin/amigo/term_details?term=GO:0031664
positive regulation of locomotion	Gene Ontology	GO:0040017	6	108	0.00772305	0.0373966	P17803|Q6YST0|B0FYK2|P42831|I3LQ14|B3GDZ4	http://amigo.geneontology.org/cgi-bin/amigo/term_details?term=GO:0040017
positive regulation of cellular component movement	Gene Ontology	GO:0051272	6	108	0.00772305	0.0373966	P17803|Q6YST0|B0FYK2|P42831|I3LQ14|B3GDZ4	http://amigo.geneontology.org/cgi-bin/amigo/term_details?term=GO:0051272
regulation of cellular component movement	Gene Ontology	GO:0051270	8	180	0.00784215	0.0378957	P17803|Q6YST0|B0FYK2|P42831|Q19S50|E7CR02|I3LQ14|B3GDZ4	http://amigo.geneontology.org/cgi-bin/amigo/term_details?term=GO:0051270
negative regulation of cell migration	Gene Ontology	GO:0030336	4	48	0.00787546	0.037979	P42831|B3GDZ4|Q19S50|E7CR02	http://amigo.geneontology.org/cgi-bin/amigo/term_details?term=GO:0030336
cellular response to nitrogen compound	Gene Ontology	GO:1901699	6	109	0.0080489	0.0387363	Q9TRC7|E7CR04|Q19S50|P23563|E7CR02|Q764M5	http://amigo.geneontology.org/cgi-bin/amigo/term_details?term=GO:1901699
regulation of MAPK cascade	Gene Ontology	GO:0043408	8	181	0.00808646	0.038786	Q8SQ34|Q6YST0|O77736|P42831|P23563|B3GDZ4|Q711P4|F1RQD6	http://amigo.geneontology.org/cgi-bin/amigo/term_details?term=GO:0043408
regulation of secretion by cell	Gene Ontology	GO:1903530	7	144	0.00810024	0.038786	Q8SQ34|F1SV36|P17803|E7CR04|P23563|F1RQD6|Q4QTK1	http://amigo.geneontology.org/cgi-bin/amigo/term_details?term=GO:1903530
biological adhesion	Gene Ontology	GO:0022610	12	346	0.00823018	0.0393284	P17803|A0FIN4|P42831|F1RTH8|P23563|A8R080|D2KC06|B3GDZ4|F1SUN4|F1RQD6|Q4QTK1|Q5S1V9	http://amigo.geneontology.org/cgi-bin/amigo/term_details?term=GO:0022610
positive regulation of hemopoiesis	Gene Ontology	GO:1903708	4	49	0.00841988	0.0399923	P17803|Q6YST0|P23563|F1RTH8	http://amigo.geneontology.org/cgi-bin/amigo/term_details?term=GO:1903708
regulation of endocytosis	Gene Ontology	GO:0030100	4	49	0.00841988	0.0399923	P42831|B3GDZ4|Q8MJ80|P23563	http://amigo.geneontology.org/cgi-bin/amigo/term_details?term=GO:0030100
negative regulation of cell motility	Gene Ontology	GO:2000146	4	49	0.00841988	0.0399923	P42831|B3GDZ4|Q19S50|E7CR02	http://amigo.geneontology.org/cgi-bin/amigo/term_details?term=GO:2000146
nucleoside diphosphate phosphorylation	Gene Ontology	GO:0006165	3	25	0.00853179	0.0402006	Q19S50|F1S3B7|E7CR02	http://amigo.geneontology.org/cgi-bin/amigo/term_details?term=GO:0006165
tyrosine phosphorylation of STAT protein	Gene Ontology	GO:0007260	3	25	0.00853179	0.0402006	Q8SQ34|P17803|E7CR04	http://amigo.geneontology.org/cgi-bin/amigo/term_details?term=GO:0007260
positive regulation of striated muscle cell differentiation	Gene Ontology	GO:0051155	3	25	0.00853179	0.0402006	B0FYK2|F1S628|Q8MJD6	http://amigo.geneontology.org/cgi-bin/amigo/term_details?term=GO:0051155
collagen trimer	Gene Ontology	GO:0005581	3	25	0.00853179	0.0402006	F1STZ3|F1STZ1|Q69DL0	http://amigo.geneontology.org/cgi-bin/amigo/term_details?term=GO:0005581
catabolic process	Gene Ontology	GO:0009056	15	484	0.00865543	0.0407021	Q8MJ80|P17803|F4ZS20|Q9MZS9|Q19S50|P23563|F1S3B7|F1SUN4|F1S2T7|A5D9J4|F1S0V6|Q2PYM7|Q64L94|E7CR02|Q863Z0	http://amigo.geneontology.org/cgi-bin/amigo/term_details?term=GO:0009056
transcription regulatory region DNA binding	Gene Ontology	GO:0044212	9	223	0.00879703	0.0412858	A0FIN4|O97930|Q19S50|P23563|E7CR02|D2KC06|A0A140TAJ8|I3LV04|A0ZVR0	http://amigo.geneontology.org/cgi-bin/amigo/term_details?term=GO:0044212
single-organism localization	Gene Ontology	GO:1902578	21	777	0.00888939	0.0416365	Q8SQ34|F1SV36|P01025|Q6YST0|C7F842|F1RZR9|P17803|P42831|E7CR04|F1SEU0|Q19S50|P23563|E7CR02|B0FYK2|Q8MJ80|Q4QTK1|I3LUA0|F1RQD6|I3LQQ9|B3GDZ4|F1S731	http://amigo.geneontology.org/cgi-bin/amigo/term_details?term=GO:1902578
positive regulation of cytosolic calcium ion concentration	Gene Ontology	GO:0007204	4	50	0.0089884	0.042017	I3LQ14|B0FYK2|Q6YST0|F1RZR9	http://amigo.geneontology.org/cgi-bin/amigo/term_details?term=GO:0007204
signal transduction by protein phosphorylation	Gene Ontology	GO:0023014	9	224	0.00903531	0.0421529	Q8SQ34|Q6YST0|O77736|P42831|P23563|B3GDZ4|Q711P4|O77741|F1RQD6	http://amigo.geneontology.org/cgi-bin/amigo/term_details?term=GO:0023014
cell death	Gene Ontology	GO:0008219	15	487	0.00912085	0.0424681	Q8SQ34|F1SV36|A0FIN4|O77736|P17803|P42831|Q19S50|P23563|E7CR02|D2KC06|B3GDZ4|F1SBR1|Q9N2I1|Q764M5|Q4QTK1	http://amigo.geneontology.org/cgi-bin/amigo/term_details?term=GO:0008219
regulatory region DNA binding	Gene Ontology	GO:0000975	9	225	0.00927847	0.0426336	A0FIN4|O97930|Q19S50|P23563|E7CR02|D2KC06|A0A140TAJ8|I3LV04|A0ZVR0	http://amigo.geneontology.org/cgi-bin/amigo/term_details?term=GO:0000975
regulatory region nucleic acid binding	Gene Ontology	GO:0001067	9	225	0.00927847	0.0426336	A0FIN4|O97930|Q19S50|P23563|E7CR02|D2KC06|A0A140TAJ8|I3LV04|A0ZVR0	http://amigo.geneontology.org/cgi-bin/amigo/term_details?term=GO:0001067
sequence-specific double-stranded DNA binding	Gene Ontology	GO:1990837	8	186	0.00939496	0.0426336	A0FIN4|O97930|Q19S50|E7CR02|D2KC06|A0A140TAJ8|I3LV04|A0ZVR0	http://amigo.geneontology.org/cgi-bin/amigo/term_details?term=GO:1990837
regulation of interleukin-6 production	Gene Ontology	GO:0032675	3	26	0.0094119	0.0426336	P17803|F1RQD6|P23563	http://amigo.geneontology.org/cgi-bin/amigo/term_details?term=GO:0032675
lymphocyte differentiation	Gene Ontology	GO:0030098	6	113	0.00945184	0.0426336	P17803|A0FIN4|F1RTH8|F1SUN4|D2KC06|Q5S1V9	http://amigo.geneontology.org/cgi-bin/amigo/term_details?term=GO:0030098
tumor necrosis factor-activated receptor activity	Gene Ontology	GO:0005031	2	8	0.00953528	0.0426336	Q8SQ34|O77736	http://amigo.geneontology.org/cgi-bin/amigo/term_details?term=GO:0005031
eating behavior	Gene Ontology	GO:0042755	2	8	0.00953528	0.0426336	Q19S50|E7CR02	http://amigo.geneontology.org/cgi-bin/amigo/term_details?term=GO:0042755
chemokine biosynthetic process	Gene Ontology	GO:0042033	2	8	0.00953528	0.0426336	P17803|P23563	http://amigo.geneontology.org/cgi-bin/amigo/term_details?term=GO:0042033
eye photoreceptor cell differentiation	Gene Ontology	GO:0001754	2	8	0.00953528	0.0426336	Q19S50|E7CR02	http://amigo.geneontology.org/cgi-bin/amigo/term_details?term=GO:0001754
death receptor activity	Gene Ontology	GO:0005035	2	8	0.00953528	0.0426336	Q8SQ34|O77736	http://amigo.geneontology.org/cgi-bin/amigo/term_details?term=GO:0005035
positive regulation of alpha-beta T cell differentiation	Gene Ontology	GO:0046638	2	8	0.00953528	0.0426336	P17803|F1RTH8	http://amigo.geneontology.org/cgi-bin/amigo/term_details?term=GO:0046638
chemokine metabolic process	Gene Ontology	GO:0050755	2	8	0.00953528	0.0426336	P17803|P23563	http://amigo.geneontology.org/cgi-bin/amigo/term_details?term=GO:0050755
positive regulation of reactive oxygen species biosynthetic process	Gene Ontology	GO:1903428	2	8	0.00953528	0.0426336	P17803|P23563	http://amigo.geneontology.org/cgi-bin/amigo/term_details?term=GO:1903428
positive regulation of chemokine biosynthetic process	Gene Ontology	GO:0045080	2	8	0.00953528	0.0426336	P17803|P23563	http://amigo.geneontology.org/cgi-bin/amigo/term_details?term=GO:0045080
regulation of chemokine biosynthetic process	Gene Ontology	GO:0045073	2	8	0.00953528	0.0426336	P17803|P23563	http://amigo.geneontology.org/cgi-bin/amigo/term_details?term=GO:0045073
vitamin biosynthetic process	Gene Ontology	GO:0009110	2	8	0.00953528	0.0426336	P17803|P23563	http://amigo.geneontology.org/cgi-bin/amigo/term_details?term=GO:0009110
interleukin-1 beta secretion	Gene Ontology	GO:0050702	2	8	0.00953528	0.0426336	F1SV36|P17803	http://amigo.geneontology.org/cgi-bin/amigo/term_details?term=GO:0050702
interleukin-1 secretion	Gene Ontology	GO:0050701	2	8	0.00953528	0.0426336	F1SV36|P17803	http://amigo.geneontology.org/cgi-bin/amigo/term_details?term=GO:0050701
interleukin-4 production	Gene Ontology	GO:0032633	2	8	0.00953528	0.0426336	F1RTH8|F1RQD6	http://amigo.geneontology.org/cgi-bin/amigo/term_details?term=GO:0032633
energy homeostasis	Gene Ontology	GO:0097009	2	8	0.00953528	0.0426336	Q19S50|E7CR02	http://amigo.geneontology.org/cgi-bin/amigo/term_details?term=GO:0097009
positive regulation of alcohol biosynthetic process	Gene Ontology	GO:1902932	2	8	0.00953528	0.0426336	P17803|P23563	http://amigo.geneontology.org/cgi-bin/amigo/term_details?term=GO:1902932
positive regulation of secretion by cell	Gene Ontology	GO:1903532	5	81	0.00983505	0.0438495	F1SV36|F1RQD6|P23563|Q4QTK1|P17803	http://amigo.geneontology.org/cgi-bin/amigo/term_details?term=GO:1903532
regulation of phosphorylation	Gene Ontology	GO:0042325	13	400	0.00997274	0.0443796	Q8SQ34|P17803|P01025|Q6YST0|O77736|P42831|E7CR04|Q19S50|P23563|E7CR02|B3GDZ4|Q711P4|F1RQD6	http://amigo.geneontology.org/cgi-bin/amigo/term_details?term=GO:0042325
gliogenesis	Gene Ontology	GO:0042063	4	52	0.0101994	0.0453028	P42831|B3GDZ4|Q19S50|E7CR02	http://amigo.geneontology.org/cgi-bin/amigo/term_details?term=GO:0042063
positive regulation of B cell activation	Gene Ontology	GO:0050871	3	27	0.0103431	0.0457692	Q8SQ34|P17803|F1RTH8	http://amigo.geneontology.org/cgi-bin/amigo/term_details?term=GO:0050871
nucleotide phosphorylation	Gene Ontology	GO:0046939	3	27	0.0103431	0.0457692	Q19S50|F1S3B7|E7CR02	http://amigo.geneontology.org/cgi-bin/amigo/term_details?term=GO:0046939
coenzyme metabolic process	Gene Ontology	GO:0006732	5	83	0.0108014	0.0477078	Q9MZS9|Q19S50|Q9BDJ5|F1S3B7|E7CR02	http://amigo.geneontology.org/cgi-bin/amigo/term_details?term=GO:0006732
cellular response to peptide hormone stimulus	Gene Ontology	GO:0071375	4	53	0.0108426	0.0478003	E7CR04|Q764M5|Q19S50|E7CR02	http://amigo.geneontology.org/cgi-bin/amigo/term_details?term=GO:0071375
regulation of cell death	Gene Ontology	GO:0010941	13	406	0.0111654	0.0490476	Q8SQ34|F1SV36|O77736|P17803|P42831|Q19S50|P23563|E7CR02|B3GDZ4|F1SBR1|Q9N2I1|Q764M5|Q4QTK1	http://amigo.geneontology.org/cgi-bin/amigo/term_details?term=GO:0010941
single-organism catabolic process	Gene Ontology	GO:0044712	8	192	0.011167	0.0490476	Q9MZS9|Q19S50|P23563|F1S3B7|F1SUN4|F1S2T7|F1S0V6|E7CR02	http://amigo.geneontology.org/cgi-bin/amigo/term_details?term=GO:0044712
cell activation involved in immune response	Gene Ontology	GO:0002263	5	84	0.0113081	0.0494698	Q8SQ34|P17803|Q7YRL4|F1RQD6|Q5S1V9	http://amigo.geneontology.org/cgi-bin/amigo/term_details?term=GO:0002263
leukocyte activation involved in immune response	Gene Ontology	GO:0002366	5	84	0.0113081	0.0494698	Q8SQ34|P17803|Q7YRL4|F1RQD6|Q5S1V9	http://amigo.geneontology.org/cgi-bin/amigo/term_details?term=GO:0002366
negative regulation of hemopoiesis	Gene Ontology	GO:1903707	3	28	0.0113259	0.0494698	D2KC06|F1STZ3|A0FIN4	http://amigo.geneontology.org/cgi-bin/amigo/term_details?term=GO:1903707
cellular response to peptide	Gene Ontology	GO:1901653	4	54	0.0115114	0.0494854	E7CR04|Q764M5|Q19S50|E7CR02	http://amigo.geneontology.org/cgi-bin/amigo/term_details?term=GO:1901653
positive regulation of interleukin-10 production	Gene Ontology	GO:0032733	2	9	0.0115389	0.0494854	F1RTH8|Q4QTK1	http://amigo.geneontology.org/cgi-bin/amigo/term_details?term=GO:0032733
complement activation, classical pathway	Gene Ontology	GO:0006958	2	9	0.0115389	0.0494854	P01025|Q69DL0	http://amigo.geneontology.org/cgi-bin/amigo/term_details?term=GO:0006958
positive regulation of monooxygenase activity	Gene Ontology	GO:0032770	2	9	0.0115389	0.0494854	P17803|P23563	http://amigo.geneontology.org/cgi-bin/amigo/term_details?term=GO:0032770
plasma lipoprotein particle clearance	Gene Ontology	GO:0034381	2	9	0.0115389	0.0494854	I3LUA0|F1SEU0	http://amigo.geneontology.org/cgi-bin/amigo/term_details?term=GO:0034381
negative regulation of T cell differentiation	Gene Ontology	GO:0045581	2	9	0.0115389	0.0494854	D2KC06|A0FIN4	http://amigo.geneontology.org/cgi-bin/amigo/term_details?term=GO:0045581
T-helper 1 type immune response	Gene Ontology	GO:0042088	2	9	0.0115389	0.0494854	F1RQD6|Q5S1V9	http://amigo.geneontology.org/cgi-bin/amigo/term_details?term=GO:0042088
regulation of neuron migration	Gene Ontology	GO:2001222	2	9	0.0115389	0.0494854	Q19S50|E7CR02	http://amigo.geneontology.org/cgi-bin/amigo/term_details?term=GO:2001222
regulation of immunoglobulin secretion	Gene Ontology	GO:0051023	2	9	0.0115389	0.0494854	Q8SQ34|P23563	http://amigo.geneontology.org/cgi-bin/amigo/term_details?term=GO:0051023
regulation of membrane protein ectodomain proteolysis	Gene Ontology	GO:0051043	2	9	0.0115389	0.0494854	P17803|P23563	http://amigo.geneontology.org/cgi-bin/amigo/term_details?term=GO:0051043
intracellular signal transduction	Gene Ontology	GO:0035556	19	696	0.0115943	0.049633	Q8SQ34|P17803|Q6YST0|O77736|B0FYK2|P42831|F1RQD6|Q19S50|F1RZR9|P23563|E7CR02|B3GDZ4|F1SJ12|Q711P4|E7CR04|O77741|Q764M5|F1SBG3|Q06AU8	http://amigo.geneontology.org/cgi-bin/amigo/term_details?term=GO:0035556
