# Supplementary material for: Global Transcriptome Profiling of Multiple Porcine Organs Reveals Toxoplasma gondii-Induced Transcriptional Landscapes
Source: Front Immunol. 2019 Jul 3;10:1531. doi: 10.3389/fimmu.2019.01531 (PMC6618905; doi:10.3389/fimmu.2019.01531)
Supplement: Supplementary Table 7 — Significantly enriched GO terms and pathways of DETs in the higher expression cluster at 18 dpi. [file Table_7.XLSX]

## Sheet: higher at 18 dpi
##Databases: KEGG PATHWAY, Gene Ontology
##Statistical test method: hypergeometric test / Fisher's exact test
##FDR correction method: Benjamini and Hochberg
KEGG pathways
#Term	Database	KEGG ID	Input number	Background number	P-Value	Corrected P-Value	Input protein ID	Hyperlink
Graft-versus-host disease	KEGG PATHWAY	ssc05332	9	38	2.44011e-07	0.000250457	Q9TSW6|Q8MHU1|Q9BEA8|F1SUB6|Q31065|Q7YQ90|Q547Q5|A1YH77|B8XTR7	http://www.genome.jp/kegg-bin/show_pathway?ssc05332/ssc:100153387%09red/ssc:100233184%09red/ssc:100135029%09red/ssc:100135037%09red/ssc:100037293%09red/ssc:396726%09red/ssc:100037921%09red/ssc:396595%09red/ssc:100135040%09red
Allograft rejection	KEGG PATHWAY	ssc05330	9	42	5.09009e-07	0.000250457	Q9TSW6|Q8MHU1|Q9BEA8|F1SUB6|Q31065|Q7YQ90|Q547Q5|A1YH77|B8XTR7	http://www.genome.jp/kegg-bin/show_pathway?ssc05330/ssc:100153387%09red/ssc:100233184%09red/ssc:100135029%09red/ssc:100135037%09red/ssc:100037293%09red/ssc:396726%09red/ssc:100037921%09red/ssc:396595%09red/ssc:100135040%09red
Type I diabetes mellitus	KEGG PATHWAY	ssc04940	9	43	6.05184e-07	0.000250457	Q9TSW6|Q8MHU1|Q9BEA8|F1SUB6|Q31065|Q7YQ90|Q547Q5|A1YH77|B8XTR7	http://www.genome.jp/kegg-bin/show_pathway?ssc04940/ssc:100153387%09red/ssc:100233184%09red/ssc:100135029%09red/ssc:100135037%09red/ssc:100037293%09red/ssc:396726%09red/ssc:100037921%09red/ssc:396595%09red/ssc:100135040%09red
Autoimmune thyroid disease	KEGG PATHWAY	ssc05320	9	52	2.44866e-06	0.000603419	Q9TSW6|Q8MHU1|Q9BEA8|F1SUB6|Q31065|Q7YQ90|Q547Q5|A1YH77|B8XTR7	http://www.genome.jp/kegg-bin/show_pathway?ssc05320/ssc:100153387%09red/ssc:100233184%09red/ssc:100135029%09red/ssc:100135037%09red/ssc:100037293%09red/ssc:396726%09red/ssc:100037921%09red/ssc:396595%09red/ssc:100135040%09red
Antigen processing and presentation	KEGG PATHWAY	ssc04612	9	58	5.45365e-06	0.000987456	Q6T366|Q9TSW6|Q8MHU1|Q547Q5|Q31065|Q7YQ90|Q6R2U9|A1YH77|A1E295	http://www.genome.jp/kegg-bin/show_pathway?ssc04612/ssc:100037961%09red/ssc:100153387%09red/ssc:100135029%09red/ssc:100135037%09red/ssc:100037293%09red/ssc:100037921%09red/ssc:396636%09red/ssc:396627%09red/ssc:100135040%09red
Phagosome	KEGG PATHWAY	ssc04145	11	114	3.14749e-05	0.00493584	Q9TSW6|Q8MHU1|B3FVQ2|G9K122|Q547Q5|Q9TTK7|Q7YQ90|F1SAA2|A7BG66|Q31065|A1YH77	http://www.genome.jp/kegg-bin/show_pathway?ssc04145/ssc:100170134%09red/ssc:100153387%09red/ssc:100037938%09red/ssc:100135029%09red/ssc:100135037%09red/ssc:100037293%09red/ssc:396724%09red/ssc:100037921%09red/ssc:100512277%09red/ssc:100135040%09red/ssc:445003%09red
Viral myocarditis	KEGG PATHWAY	ssc05416	7	45	6.06334e-05	0.00720447	Q9TSW6|Q8MHU1|F1SUB6|Q31065|Q7YQ90|Q547Q5|A1YH77	http://www.genome.jp/kegg-bin/show_pathway?ssc05416/ssc:100153387%09red/ssc:100135029%09red/ssc:100135037%09red/ssc:100037293%09red/ssc:100037921%09red/ssc:396595%09red/ssc:100135040%09red
Cell adhesion molecules (CAMs)	KEGG PATHWAY	ssc04514	9	91	0.000138923	0.0114115	Q6T366|Q9TSW6|Q8MHU1|Q547Q5|Q31065|Q7YQ90|Q6R2U9|Q764N3|A1YH77	http://www.genome.jp/kegg-bin/show_pathway?ssc04514/ssc:100153387%09red/ssc:100135029%09red/ssc:100135037%09red/ssc:100037293%09red/ssc:100037921%09red/ssc:396636%09red/ssc:396627%09red/ssc:100135040%09red/ssc:396662%09red
Primary immunodeficiency	KEGG PATHWAY	ssc05340	5	25	0.000253071	0.0167903	Q6T366|Q6R2U9|K7GRK6|B8XSK4|Q7YRN2	http://www.genome.jp/kegg-bin/show_pathway?ssc05340/ssc:396636%09red/ssc:100739325%09red/ssc:100233188%09red/ssc:397455%09red/ssc:396627%09red
GO terms
#Term	Database	GO ID	Input number	Background number	P-Value	Corrected P-Value	Input protein ID	Hyperlink
immune response	Gene Ontology	GO:0006955	18	389	6.17215e-07	0.000250457	O46427|Q2EN89|P80310|Q9BEA8|Q547Q5|P14632|I3LGN7|F1S9Q6|F1RU23|F1S1A9|Q9TU45|Q6YT41|Q6YT42|P79401|F1SUB6|B2D1T2|F1RJF8|B8XTR7	http://amigo.geneontology.org/cgi-bin/amigo/term_details?term=GO:0006955
extracellular space	Gene Ontology	GO:0005615	20	480	7.25962e-07	0.000250457	O46427|Q4Z8N7|Q2EN89|F1SV69|P14287|P79335|Q9BEA8|B2D1T2|P14632|F1RJ68|Q2HXZ9|F1RN76|F1RU23|F1S1A9|D0G7G0|F1SN71|P35624|A1E295|Q29411|I3LVL5	http://amigo.geneontology.org/cgi-bin/amigo/term_details?term=GO:0005615
immune system process	Gene Ontology	GO:0002376	23	652	1.73767e-06	0.00049958	B2D1T2|Q9TU45|Q9TTK7|F1SG04|F1RU23|Q4Z8N7|Q547Q5|P14632|F1S1A9|I3LGN7|Q7YRN2|Q2EN89|O46427|P80310|F1S9Q6|Q6YT41|Q6YT42|P79401|F1RJF8|Q9BEA8|K7GML5|F1SUB6|B8XTR7	http://amigo.geneontology.org/cgi-bin/amigo/term_details?term=GO:0002376
inflammatory response	Gene Ontology	GO:0006954	11	169	4.55402e-06	0.000981962	Q2EN89|Q2VL90|P80310|Q29411|Q2HXZ9|K7GML5|Q9TTK7|Q6YT44|Q6YT41|Q6YT42|F1RJF8	http://amigo.geneontology.org/cgi-bin/amigo/term_details?term=GO:0006954
defense response	Gene Ontology	GO:0006952	17	414	5.72438e-06	0.000987456	Q29411|Q2EN89|Q2VL90|P80310|F1S9Q6|P14632|I3LGN7|Q2HXZ9|K7GML5|Q9TTK7|Q6YT44|Q6YT41|Q6YT42|P79401|F1SUB6|F1RJF8|B8XTR7	http://amigo.geneontology.org/cgi-bin/amigo/term_details?term=GO:0006952
serine-type endopeptidase activity	Gene Ontology	GO:0004252	6	54	4.48161e-05	0.00644231	O46427|F1SV69|B2D1T2|P14632|B8XTR9|B8XTR7	http://amigo.geneontology.org/cgi-bin/amigo/term_details?term=GO:0004252
specific granule	Gene Ontology	GO:0042581	3	5	6.51721e-05	0.00720447	P14632|F1RJ68|I3LVL5	http://amigo.geneontology.org/cgi-bin/amigo/term_details?term=GO:0042581
G-protein coupled chemoattractant receptor activity	Gene Ontology	GO:0001637	4	17	6.68241e-05	0.00720447	Q6YT44|Q6YT41|Q6YT42|K7GML5	http://amigo.geneontology.org/cgi-bin/amigo/term_details?term=GO:0001637
chemokine receptor activity	Gene Ontology	GO:0004950	4	17	6.68241e-05	0.00720447	Q6YT44|Q6YT41|Q6YT42|K7GML5	http://amigo.geneontology.org/cgi-bin/amigo/term_details?term=GO:0004950
serine-type peptidase activity	Gene Ontology	GO:0008236	6	61	8.38416e-05	0.00850746	O46427|F1SV69|B2D1T2|P14632|B8XTR9|B8XTR7	http://amigo.geneontology.org/cgi-bin/amigo/term_details?term=GO:0008236
serine hydrolase activity	Gene Ontology	GO:0017171	6	62	9.11261e-05	0.00857927	O46427|F1SV69|B2D1T2|P14632|B8XTR9|B8XTR7	http://amigo.geneontology.org/cgi-bin/amigo/term_details?term=GO:0017171
chemokine-mediated signaling pathway	Gene Ontology	GO:0070098	5	38	9.44963e-05	0.00857927	Q6YT44|Q2EN89|Q6YT41|Q6YT42|K7GML5	http://amigo.geneontology.org/cgi-bin/amigo/term_details?term=GO:0070098
endopeptidase activity	Gene Ontology	GO:0004175	8	126	0.00010547	0.00909683	O46427|F1SV69|B2D1T2|P14632|F1RU23|B8XTR9|A1E295|B8XTR7	http://amigo.geneontology.org/cgi-bin/amigo/term_details?term=GO:0004175
response to thyroid hormone	Gene Ontology	GO:0097066	3	8	0.000187472	0.0140604	O46427|B2D1T2|A1E295	http://amigo.geneontology.org/cgi-bin/amigo/term_details?term=GO:0097066
cellular response to thyroid hormone stimulus	Gene Ontology	GO:0097067	3	8	0.000187472	0.0140604	O46427|B2D1T2|A1E295	http://amigo.geneontology.org/cgi-bin/amigo/term_details?term=GO:0097067
cysteine-type endopeptidase activity	Gene Ontology	GO:0004197	4	24	0.000215407	0.0154824	O46427|B2D1T2|A1E295|F1RU23	http://amigo.geneontology.org/cgi-bin/amigo/term_details?term=GO:0004197
leukocyte mediated cytotoxicity	Gene Ontology	GO:0001909	4	25	0.000247761	0.0167903	O46427|B2D1T2|F1S9Q6|B8XTR7	http://amigo.geneontology.org/cgi-bin/amigo/term_details?term=GO:0001909
positive regulation of monocyte chemotaxis	Gene Ontology	GO:0090026	3	11	0.000403785	0.0248761	Q4Z8N7|Q2EN89|Q6YT42	http://amigo.geneontology.org/cgi-bin/amigo/term_details?term=GO:0090026
chemokine binding	Gene Ontology	GO:0019956	3	11	0.000403785	0.0248761	Q6YT44|Q6YT41|K7GML5	http://amigo.geneontology.org/cgi-bin/amigo/term_details?term=GO:0019956
cytokine receptor activity	Gene Ontology	GO:0004896	4	30	0.000463703	0.0275824	Q6YT44|Q6YT41|Q6YT42|K7GML5	http://amigo.geneontology.org/cgi-bin/amigo/term_details?term=GO:0004896
regulation of monocyte chemotaxis	Gene Ontology	GO:0090025	3	12	0.000500722	0.0287915	Q4Z8N7|Q2EN89|Q6YT42	http://amigo.geneontology.org/cgi-bin/amigo/term_details?term=GO:0090025
response to cytokine	Gene Ontology	GO:0034097	9	208	0.000606945	0.0337736	Q2EN89|Q29411|K7GML5|P35624|Q6YT44|Q6YT41|Q6YT42|P79401|F1RJF8	http://amigo.geneontology.org/cgi-bin/amigo/term_details?term=GO:0034097
lysosome	Gene Ontology	GO:0005764	7	129	0.000689143	0.0360234	O46427|Q9BEA8|B2D1T2|F1RU23|F1SAA2|F1SUB6|A1E295	http://amigo.geneontology.org/cgi-bin/amigo/term_details?term=GO:0005764
lytic vacuole	Gene Ontology	GO:0000323	7	129	0.000689143	0.0360234	O46427|Q9BEA8|B2D1T2|F1RU23|F1SAA2|F1SUB6|A1E295	http://amigo.geneontology.org/cgi-bin/amigo/term_details?term=GO:0000323
secretory granule	Gene Ontology	GO:0030141	5	62	0.000767592	0.0384878	O46427|B2D1T2|P14632|F1RJ68|I3LVL5	http://amigo.geneontology.org/cgi-bin/amigo/term_details?term=GO:0030141
positive regulation of angiogenesis	Gene Ontology	GO:0045766	4	35	0.000788351	0.0384878	O46427|B2D1T2|Q29411|K7GML5	http://amigo.geneontology.org/cgi-bin/amigo/term_details?term=GO:0045766
regulation of immune system process	Gene Ontology	GO:0002682	11	312	0.000822528	0.0384878	O46427|Q4Z8N7|B2D1T2|P14632|F1S1A9|F1S9Q6|Q9TU45|K7GML5|F1SG04|Q6YT42|Q2EN89	http://amigo.geneontology.org/cgi-bin/amigo/term_details?term=GO:0002682
extracellular region part	Gene Ontology	GO:0044421	25	1123	0.000825535	0.0384878	F1S1A9|I3LVL5|P14287|B2D1T2|F1SG04|Q2EN77|Q4Z8N7|F1SV69|P14632|F1RJ68|P35624|F1RU23|P79335|F1SN71|Q2EN89|O46427|Q29411|F1SAA2|D0G7G0|D9U8D1|F1S5L3|A1E295|Q9BEA8|Q2HXZ9|F1RN76	http://amigo.geneontology.org/cgi-bin/amigo/term_details?term=GO:0044421
lymphocyte mediated immunity	Gene Ontology	GO:0002449	5	64	0.000877715	0.0398436	O46427|B2D1T2|I3LGN7|F1S9Q6|B8XTR7	http://amigo.geneontology.org/cgi-bin/amigo/term_details?term=GO:0002449
positive regulation of vasculature development	Gene Ontology	GO:1904018	4	37	0.00095438	0.0414374	O46427|B2D1T2|Q29411|K7GML5	http://amigo.geneontology.org/cgi-bin/amigo/term_details?term=GO:1904018
response to external stimulus	Gene Ontology	GO:0009605	15	531	0.000965507	0.0414374	Q4Z8N7|Q2EN89|P14287|P80310|F1SUB6|P14632|I3LGN7|Q2HXZ9|K7GML5|Q6YT44|D0G7G0|Q6YT41|Q6YT42|F1RJF8|Q29411	http://amigo.geneontology.org/cgi-bin/amigo/term_details?term=GO:0009605
extracellular region	Gene Ontology	GO:0005576	28	1333	0.000986885	0.0414374	F1S1A9|I3LVL5|P14287|B2D1T2|Q9TTK7|F1SG04|Q2VL90|Q2EN77|Q4Z8N7|F1SV69|P14632|F1RJ68|P35624|F1RU23|P79335|F1SN71|A1E295|O46427|P80310|Q29411|F1SAA2|D0G7G0|D9U8D1|F1S5L3|Q2EN89|Q9BEA8|Q2HXZ9|F1RN76	http://amigo.geneontology.org/cgi-bin/amigo/term_details?term=GO:0005576
plasma lipoprotein particle	Gene Ontology	GO:0034358	3	16	0.00103293	0.0414374	Q4Z8N7|F1S1A9|Q2HXZ9	http://amigo.geneontology.org/cgi-bin/amigo/term_details?term=GO:0034358
lipoprotein particle	Gene Ontology	GO:1990777	3	16	0.00103293	0.0414374	Q4Z8N7|F1S1A9|Q2HXZ9	http://amigo.geneontology.org/cgi-bin/amigo/term_details?term=GO:1990777
cell killing	Gene Ontology	GO:0001906	4	39	0.00114356	0.0448328	O46427|B2D1T2|F1S9Q6|B8XTR7	http://amigo.geneontology.org/cgi-bin/amigo/term_details?term=GO:0001906
protein-lipid complex	Gene Ontology	GO:0032994	3	17	0.00120559	0.0462141	Q4Z8N7|F1S1A9|Q2HXZ9	http://amigo.geneontology.org/cgi-bin/amigo/term_details?term=GO:0032994
peptidase activity, acting on L-amino acid peptides	Gene Ontology	GO:0070011	8	188	0.00132836	0.0498134	O46427|F1SV69|B2D1T2|P14632|F1RU23|B8XTR9|A1E295|B8XTR7	http://amigo.geneontology.org/cgi-bin/amigo/term_details?term=GO:0070011
chemotaxis	Gene Ontology	GO:0006935	7	146	0.00136936	0.049863	Q4Z8N7|Q2HXZ9|K7GML5|Q6YT44|Q6YT41|Q6YT42|Q2EN89	http://amigo.geneontology.org/cgi-bin/amigo/term_details?term=GO:0006935
membrane protein proteolysis	Gene Ontology	GO:0033619	3	18	0.00139538	0.049863	O46427|B2D1T2|P35624	http://amigo.geneontology.org/cgi-bin/amigo/term_details?term=GO:0033619
cellular response to cytokine stimulus	Gene Ontology	GO:0071345	8	190	0.0014164	0.049863	Q2EN89|Q29411|K7GML5|Q6YT44|Q6YT41|Q6YT42|P79401|F1RJF8	http://amigo.geneontology.org/cgi-bin/amigo/term_details?term=GO:0071345
positive regulation of locomotion	Gene Ontology	GO:0040017	6	108	0.00146689	0.0498975	O46427|Q4Z8N7|B2D1T2|K7GML5|Q6YT42|Q2EN89	http://amigo.geneontology.org/cgi-bin/amigo/term_details?term=GO:0040017
taxis	Gene Ontology	GO:0042330	7	148	0.00147523	0.0498975	Q4Z8N7|Q2HXZ9|K7GML5|Q6YT44|Q6YT41|Q6YT42|Q2EN89	http://amigo.geneontology.org/cgi-bin/amigo/term_details?term=GO:0042330
