# Supplementary material for: Global Transcriptome Profiling of Multiple Porcine Organs Reveals Toxoplasma gondii-Induced Transcriptional Landscapes
Source: Front Immunol. 2019 Jul 3;10:1531. doi: 10.3389/fimmu.2019.01531 (PMC6618905; doi:10.3389/fimmu.2019.01531)
Supplement: Supplementary Table 10 — Relationship between 330 xenobiotics and differentially expressed metabolism related genes. [file Table_10.XLSX]

## Sheet: Sheet1
Gene protein ID	Gene	Gene description	Xenobiotics name
P05181	CYP2E1	Cytochrome P450 2E1	Ethanol
P04798	CYP1A1	Cytochrome P450 1A1	Ethanol
P05177	CYP1A2	Cytochrome P450 1A2	Ethanol
P00326	ADH1C	Alcohol dehydrogenase 1C	Ethanol
P08319	ADH4	Alcohol dehydrogenase 4	Ethanol
P05177	CYP1A2	Cytochrome P450 1A2	Acetaminophen
P05181	CYP2E1	Cytochrome P450 2E1	Acetaminophen
P04798	CYP1A1	Cytochrome P450 1A1	Acetaminophen
Q06520	SULT2A1	Bile salt sulfotransferase	Acetaminophen
P04798	CYP1A1	Cytochrome P450 1A1	Oxaliplatin
P05177	CYP1A2	Cytochrome P450 1A2	Oxaliplatin
P05181	CYP2E1	Cytochrome P450 2E1	Oxaliplatin
P15559	NQO1	NAD(P)H dehydrogenase [quinone] 1	Oxaliplatin
P04798	CYP1A1	Cytochrome P450 1A1	Tamoxifen
P05177	CYP1A2	Cytochrome P450 1A2	Tamoxifen
Q01740	FMO1	Dimethylaniline monooxygenase [N-oxide-forming] 1	Tamoxifen
P05181	CYP2E1	Cytochrome P450 2E1	Tamoxifen
P05181	CYP2E1	Cytochrome P450 2E1	Menadione
P04798	CYP1A1	Cytochrome P450 1A1	Menadione
P05177	CYP1A2	Cytochrome P450 1A2	Menadione
P05177	CYP1A2	Cytochrome P450 1A2	Fluvoxamine
P05181	CYP2E1	Cytochrome P450 2E1	Fluvoxamine
P04798	CYP1A1	Cytochrome P450 1A1	Fluvoxamine
P05181	CYP2E1	Cytochrome P450 2E1	Nicotine
P04798	CYP1A1	Cytochrome P450 1A1	Nicotine
P05177	CYP1A2	Cytochrome P450 1A2	Nicotine
P05177	CYP1A2	Cytochrome P450 1A2	Caffeine
P05181	CYP2E1	Cytochrome P450 2E1	Caffeine
P04798	CYP1A1	Cytochrome P450 1A1	Caffeine
P05177	CYP1A2	Cytochrome P450 1A2	Ticlopidine
P04798	CYP1A1	Cytochrome P450 1A1	Ticlopidine
P05181	CYP2E1	Cytochrome P450 2E1	Ticlopidine
P05177	CYP1A2	Cytochrome P450 1A2	Theophylline
P05181	CYP2E1	Cytochrome P450 2E1	Theophylline
P04798	CYP1A1	Cytochrome P450 1A1	Theophylline
P05181	CYP2E1	Cytochrome P450 2E1	Chlorzoxazone
P04798	CYP1A1	Cytochrome P450 1A1	Chlorzoxazone
P05177	CYP1A2	Cytochrome P450 1A2	Chlorzoxazone
P05177	CYP1A2	Cytochrome P450 1A2	Clozapine
P05181	CYP2E1	Cytochrome P450 2E1	Clozapine
P04798	CYP1A1	Cytochrome P450 1A1	Clozapine
P04798	CYP1A1	Cytochrome P450 1A1	Streptozocin
P05177	CYP1A2	Cytochrome P450 1A2	Streptozocin
P05181	CYP2E1	Cytochrome P450 2E1	Streptozocin
P04798	CYP1A1	Cytochrome P450 1A1	Quinine
P05177	CYP1A2	Cytochrome P450 1A2	Quinine
P05181	CYP2E1	Cytochrome P450 2E1	Quinine
P05177	CYP1A2	Cytochrome P450 1A2	Cimetidine
P05181	CYP2E1	Cytochrome P450 2E1	Cimetidine
Q01740	FMO1	Dimethylaniline monooxygenase [N-oxide-forming] 1	Cimetidine
P05177	CYP1A2	Cytochrome P450 1A2	Diclofenac
P04798	CYP1A1	Cytochrome P450 1A1	Diclofenac
P05181	CYP2E1	Cytochrome P450 2E1	Diclofenac
P05181	CYP2E1	Cytochrome P450 2E1	Dexmedetomidine
P05177	CYP1A2	Cytochrome P450 1A2	Dexmedetomidine
P04798	CYP1A1	Cytochrome P450 1A1	Dexmedetomidine
P05177	CYP1A2	Cytochrome P450 1A2	Estrone
P04798	CYP1A1	Cytochrome P450 1A1	Estrone
P05181	CYP2E1	Cytochrome P450 2E1	Estrone
P05181	CYP2E1	Cytochrome P450 2E1	Propofol
P04798	CYP1A1	Cytochrome P450 1A1	Propofol
P05177	CYP1A2	Cytochrome P450 1A2	Propofol
P04798	CYP1A1	Cytochrome P450 1A1	Dacarbazine
P05177	CYP1A2	Cytochrome P450 1A2	Dacarbazine
P05181	CYP2E1	Cytochrome P450 2E1	Dacarbazine
P04798	CYP1A1	Cytochrome P450 1A1	Clomifene
P05177	CYP1A2	Cytochrome P450 1A2	Clomifene
P05181	CYP2E1	Cytochrome P450 2E1	Clomifene
P05177	CYP1A2	Cytochrome P450 1A2	Quinidine
P05181	CYP2E1	Cytochrome P450 2E1	Quinidine
P04798	CYP1A1	Cytochrome P450 1A1	Quinidine
P05177	CYP1A2	Cytochrome P450 1A2	Azelastine
P04798	CYP1A1	Cytochrome P450 1A1	Azelastine
P05181	CYP2E1	Cytochrome P450 2E1	Azelastine
P05177	CYP1A2	Cytochrome P450 1A2	Ketoconazole
P04798	CYP1A1	Cytochrome P450 1A1	Ketoconazole
Q16850	CYP51A1	Lanosterol 14-alpha demethylase	Ketoconazole
P05177	CYP1A2	Cytochrome P450 1A2	Thalidomide
P04798	CYP1A1	Cytochrome P450 1A1	Thalidomide
P05181	CYP2E1	Cytochrome P450 2E1	Thalidomide
P05177	CYP1A2	Cytochrome P450 1A2	Nifedipine
P05181	CYP2E1	Cytochrome P450 2E1	Nifedipine
P04798	CYP1A1	Cytochrome P450 1A1	Nifedipine
P05177	CYP1A2	Cytochrome P450 1A2	Carvedilol
P04798	CYP1A1	Cytochrome P450 1A1	Carvedilol
P05181	CYP2E1	Cytochrome P450 2E1	Carvedilol
P05177	CYP1A2	Cytochrome P450 1A2	Phenobarbital
P05181	CYP2E1	Cytochrome P450 2E1	Phenobarbital
P04798	CYP1A1	Cytochrome P450 1A1	Phenobarbital
P05177	CYP1A2	Cytochrome P450 1A2	Lorcaserin
Q01740	FMO1	Dimethylaniline monooxygenase [N-oxide-forming] 1	Lorcaserin
P04798	CYP1A1	Cytochrome P450 1A1	Lorcaserin
P04798	CYP1A1	Cytochrome P450 1A1	Benzyl alcohol
P05177	CYP1A2	Cytochrome P450 1A2	Benzyl alcohol
P05181	CYP2E1	Cytochrome P450 2E1	Benzyl alcohol
P05177	CYP1A2	Cytochrome P450 1A2	Bortezomib
P04798	CYP1A1	Cytochrome P450 1A1	Bortezomib
P04798	CYP1A1	Cytochrome P450 1A1	Sildenafil
P05181	CYP2E1	Cytochrome P450 2E1	Sildenafil
P05181	CYP2E1	Cytochrome P450 2E1	Citalopram
P05177	CYP1A2	Cytochrome P450 1A2	Citalopram
P05177	CYP1A2	Cytochrome P450 1A2	Clotrimazole
P05181	CYP2E1	Cytochrome P450 2E1	Clotrimazole
P05177	CYP1A2	Cytochrome P450 1A2	Amitriptyline
P05181	CYP2E1	Cytochrome P450 2E1	Amitriptyline
P04798	CYP1A1	Cytochrome P450 1A1	Nitroprusside
P05177	CYP1A2	Cytochrome P450 1A2	Nitroprusside
P05177	CYP1A2	Cytochrome P450 1A2	Omeprazole
P04798	CYP1A1	Cytochrome P450 1A1	Omeprazole
P05177	CYP1A2	Cytochrome P450 1A2	Mexiletine
P05181	CYP2E1	Cytochrome P450 2E1	Mexiletine
P05177	CYP1A2	Cytochrome P450 1A2	Amlodipine
P04798	CYP1A1	Cytochrome P450 1A1	Amlodipine
P04798	CYP1A1	Cytochrome P450 1A1	Progesterone
P05177	CYP1A2	Cytochrome P450 1A2	Progesterone
P04798	CYP1A1	Cytochrome P450 1A1	Lansoprazole
P05177	CYP1A2	Cytochrome P450 1A2	Lansoprazole
P05177	CYP1A2	Cytochrome P450 1A2	Imipramine
P05181	CYP2E1	Cytochrome P450 2E1	Imipramine
P05177	CYP1A2	Cytochrome P450 1A2	Chlorpromazine
P05181	CYP2E1	Cytochrome P450 2E1	Chlorpromazine
P05177	CYP1A2	Cytochrome P450 1A2	Flutamide
P04798	CYP1A1	Cytochrome P450 1A1	Flutamide
P05177	CYP1A2	Cytochrome P450 1A2	Haloperidol
P04798	CYP1A1	Cytochrome P450 1A1	Haloperidol
P05177	CYP1A2	Cytochrome P450 1A2	Ritonavir
P05181	CYP2E1	Cytochrome P450 2E1	Ritonavir
P04798	CYP1A1	Cytochrome P450 1A1	Albendazole
P05177	CYP1A2	Cytochrome P450 1A2	Albendazole
P05177	CYP1A2	Cytochrome P450 1A2	Erlotinib
P04798	CYP1A1	Cytochrome P450 1A1	Erlotinib
P04798	CYP1A1	Cytochrome P450 1A1	Toremifene
P05177	CYP1A2	Cytochrome P450 1A2	Toremifene
P05177	CYP1A2	Cytochrome P450 1A2	Nortriptyline
P05181	CYP2E1	Cytochrome P450 2E1	Nortriptyline
P05177	CYP1A2	Cytochrome P450 1A2	Zafirlukast
P05181	CYP2E1	Cytochrome P450 2E1	Zafirlukast
P05177	CYP1A2	Cytochrome P450 1A2	Methoxsalen
P04798	CYP1A1	Cytochrome P450 1A1	Methoxsalen
P05177	CYP1A2	Cytochrome P450 1A2	Cinnarizine
P04798	CYP1A1	Cytochrome P450 1A1	Cinnarizine
P05177	CYP1A2	Cytochrome P450 1A2	Propranolol
P04798	CYP1A1	Cytochrome P450 1A1	Propranolol
P05177	CYP1A2	Cytochrome P450 1A2	Clonidine
P04798	CYP1A1	Cytochrome P450 1A1	Clonidine
P04798	CYP1A1	Cytochrome P450 1A1	Sulindac
P05177	CYP1A2	Cytochrome P450 1A2	Sulindac
P05177	CYP1A2	Cytochrome P450 1A2	Fluphenazine
P05181	CYP2E1	Cytochrome P450 2E1	Fluphenazine
P05181	CYP2E1	Cytochrome P450 2E1	Clofibrate
P04798	CYP1A1	Cytochrome P450 1A1	Clofibrate
P05177	CYP1A2	Cytochrome P450 1A2	Thioridazine
P05181	CYP2E1	Cytochrome P450 2E1	Thioridazine
P05177	CYP1A2	Cytochrome P450 1A2	Warfarin
P04798	CYP1A1	Cytochrome P450 1A1	Warfarin
P05177	CYP1A2	Cytochrome P450 1A2	Daunorubicin
P04798	CYP1A1	Cytochrome P450 1A1	Daunorubicin
P05177	CYP1A2	Cytochrome P450 1A2	Thiabendazole
P04798	CYP1A1	Cytochrome P450 1A1	Thiabendazole
P04798	CYP1A1	Cytochrome P450 1A1	Pentamidine
P05177	CYP1A2	Cytochrome P450 1A2	Pentamidine
P05177	CYP1A2	Cytochrome P450 1A2	Riluzole
P04798	CYP1A1	Cytochrome P450 1A1	Riluzole
P05177	CYP1A2	Cytochrome P450 1A2	Tranylcypromine
P05181	CYP2E1	Cytochrome P450 2E1	Tranylcypromine
P05177	CYP1A2	Cytochrome P450 1A2	Methimazole
P05181	CYP2E1	Cytochrome P450 2E1	Methimazole
P05177	CYP1A2	Cytochrome P450 1A2	Etoposide
P05181	CYP2E1	Cytochrome P450 2E1	Etoposide
P05177	CYP1A2	Cytochrome P450 1A2	Estradiol
P04798	CYP1A1	Cytochrome P450 1A1	Estradiol
P05177	CYP1A2	Cytochrome P450 1A2	Diazepam
P05181	CYP2E1	Cytochrome P450 2E1	Diazepam
P05177	CYP1A2	Cytochrome P450 1A2	Ondansetron
P05181	CYP2E1	Cytochrome P450 2E1	Ondansetron
P05177	CYP1A2	Cytochrome P450 1A2	Almotriptan
P05181	CYP2E1	Cytochrome P450 2E1	Almotriptan
P05181	CYP2E1	Cytochrome P450 2E1	Isoniazid
P05177	CYP1A2	Cytochrome P450 1A2	Isoniazid
P05177	CYP1A2	Cytochrome P450 1A2	Alosetron
P05181	CYP2E1	Cytochrome P450 2E1	Alosetron
P05177	CYP1A2	Cytochrome P450 1A2	Tioconazole
P05181	CYP2E1	Cytochrome P450 2E1	Tioconazole
P04798	CYP1A1	Cytochrome P450 1A1	Clobetasol propionate
P05177	CYP1A2	Cytochrome P450 1A2	Clobetasol propionate
P05181	CYP2E1	Cytochrome P450 2E1	Methoxyflurane
P05177	CYP1A2	Cytochrome P450 1A2	Methoxyflurane
P05177	CYP1A2	Cytochrome P450 1A2	Selegiline
P05181	CYP2E1	Cytochrome P450 2E1	Selegiline
P05177	CYP1A2	Cytochrome P450 1A2	Rifampicin
P05181	CYP2E1	Cytochrome P450 2E1	Rifampicin
P05177	CYP1A2	Cytochrome P450 1A2	Norfloxacin
P04798	CYP1A1	Cytochrome P450 1A1	Norfloxacin
P04798	CYP1A1	Cytochrome P450 1A1	Melatonin
P05177	CYP1A2	Cytochrome P450 1A2	Melatonin
P05177	CYP1A2	Cytochrome P450 1A2	Primaquine
P04798	CYP1A1	Cytochrome P450 1A1	Primaquine
P04798	CYP1A1	Cytochrome P450 1A1	Fluvastatin
P05177	CYP1A2	Cytochrome P450 1A2	Fluvastatin
P05177	CYP1A2	Cytochrome P450 1A2	Pimozide
P05181	CYP2E1	Cytochrome P450 2E1	Pimozide
P05177	CYP1A2	Cytochrome P450 1A2	Miconazole
P05181	CYP2E1	Cytochrome P450 2E1	Miconazole
P05177	CYP1A2	Cytochrome P450 1A2	Amiodarone
P04798	CYP1A1	Cytochrome P450 1A1	Amiodarone
P04798	CYP1A1	Cytochrome P450 1A1	Rabeprazole
P05177	CYP1A2	Cytochrome P450 1A2	Rabeprazole
P05177	CYP1A2	Cytochrome P450 1A2	Proguanil
P05181	CYP2E1	Cytochrome P450 2E1	Proguanil
P05177	CYP1A2	Cytochrome P450 1A2	Desipramine
P05181	CYP2E1	Cytochrome P450 2E1	Desipramine
P05177	CYP1A2	Cytochrome P450 1A2	Bupropion
P05181	CYP2E1	Cytochrome P450 2E1	Bupropion
P04798	CYP1A1	Cytochrome P450 1A1	Itraconazole
P05181	CYP2E1	Cytochrome P450 2E1	Itraconazole
P05177	CYP1A2	Cytochrome P450 1A2	Dexfenfluramine
P05181	CYP2E1	Cytochrome P450 2E1	Dexfenfluramine
P05177	CYP1A2	Cytochrome P450 1A2	Aminophylline
P05181	CYP2E1	Cytochrome P450 2E1	Aminophylline
P04798	CYP1A1	Cytochrome P450 1A1	Dexamethasone
P05181	CYP2E1	Cytochrome P450 2E1	Dexamethasone
P04798	CYP1A1	Cytochrome P450 1A1	Dasatinib
P05177	CYP1A2	Cytochrome P450 1A2	Dasatinib
P05181	CYP2E1	Cytochrome P450 2E1	Hexobarbital
P05177	CYP1A2	Cytochrome P450 1A2	Hexobarbital
P05181	CYP2E1	Cytochrome P450 2E1	Methotrimeprazine
P05177	CYP1A2	Cytochrome P450 1A2	Methotrimeprazine
P04798	CYP1A1	Cytochrome P450 1A1	Clenbuterol
P05177	CYP1A2	Cytochrome P450 1A2	Clenbuterol
P05177	CYP1A2	Cytochrome P450 1A2	Theobromine
P05181	CYP2E1	Cytochrome P450 2E1	Theobromine
P05177	CYP1A2	Cytochrome P450 1A2	Antipyrine
P05181	CYP2E1	Cytochrome P450 2E1	Antipyrine
P05177	CYP1A2	Cytochrome P450 1A2	Flunitrazepam
P05181	CYP2E1	Cytochrome P450 2E1	Flunitrazepam
P05177	CYP1A2	Cytochrome P450 1A2	Bromazepam
P05181	CYP2E1	Cytochrome P450 2E1	Bromazepam
P05177	CYP1A2	Cytochrome P450 1A2	Etoricoxib
P05181	CYP2E1	Cytochrome P450 2E1	Etoricoxib
P04798	CYP1A1	Cytochrome P450 1A1	Flunarizine
P05177	CYP1A2	Cytochrome P450 1A2	Flunarizine
P05181	CYP2E1	Cytochrome P450 2E1	Clevidipine
P05177	CYP1A2	Cytochrome P450 1A2	Clevidipine
P05181	CYP2E1	Cytochrome P450 2E1	Iloperidone
P05177	CYP1A2	Cytochrome P450 1A2	Iloperidone
Q06520	SULT2A1	Bile salt sulfotransferase	Abiraterone
P05177	CYP1A2	Cytochrome P450 1A2	Abiraterone
P04798	CYP1A1	Cytochrome P450 1A1	Dapagliflozin
P05177	CYP1A2	Cytochrome P450 1A2	Dapagliflozin
P05177	CYP1A2	Cytochrome P450 1A2	Nilvadipine
P05181	CYP2E1	Cytochrome P450 2E1	Nilvadipine
P05177	CYP1A2	Cytochrome P450 1A2	Capsaicin
P05181	CYP2E1	Cytochrome P450 2E1	Capsaicin
P05177	CYP1A2	Cytochrome P450 1A2	Insulin Regular
P05181	CYP2E1	Cytochrome P450 2E1	Aldesleukin
P05177	CYP1A2	Cytochrome P450 1A2	Insulin Lispro
P05177	CYP1A2	Cytochrome P450 1A2	Insulin Glargine
P05177	CYP1A2	Cytochrome P450 1A2	Insulin, porcine
P05181	CYP2E1	Cytochrome P450 2E1	Enfuvirtide
P05181	CYP2E1	Cytochrome P450 2E1	S-Adenosylmethionine
P08263	GSTA1	Glutathione S-transferase A1	Glutathione
P05181	CYP2E1	Cytochrome P450 2E1	Folic Acid
P04798	CYP1A1	Cytochrome P450 1A1	Vitamin A
P15559	NQO1	NAD(P)H dehydrogenase [quinone] 1	Vitamin E
P04798	CYP1A1	Cytochrome P450 1A1	Pyridoxine
P04798	CYP1A1	Cytochrome P450 1A1	Cholecalciferol
Q01740	FMO1	Dimethylaniline monooxygenase [N-oxide-forming] 1	Cevimeline
P05177	CYP1A2	Cytochrome P450 1A2	Phentermine
P05177	CYP1A2	Cytochrome P450 1A2	Betaxolol
P05177	CYP1A2	Cytochrome P450 1A2	Erythromycin
P05177	CYP1A2	Cytochrome P450 1A2	Azithromycin
P05177	CYP1A2	Cytochrome P450 1A2	Pantoprazole
P05177	CYP1A2	Cytochrome P450 1A2	Nelfinavir
P05181	CYP2E1	Cytochrome P450 2E1	Enflurane
P05177	CYP1A2	Cytochrome P450 1A2	Nevirapine
P05177	CYP1A2	Cytochrome P450 1A2	Ziprasidone
P05181	CYP2E1	Cytochrome P450 2E1	Dapsone
P05181	CYP2E1	Cytochrome P450 2E1	Diethylstilbestrol
P05181	CYP2E1	Cytochrome P450 2E1	Sulfanilamide
P05177	CYP1A2	Cytochrome P450 1A2	Anagrelide
P05177	CYP1A2	Cytochrome P450 1A2	Carmustine
P05177	CYP1A2	Cytochrome P450 1A2	Ropinirole
P05177	CYP1A2	Cytochrome P450 1A2	Lidocaine
P05177	CYP1A2	Cytochrome P450 1A2	Conjugated Estrogens
P05177	CYP1A2	Cytochrome P450 1A2	Ropivacaine
P05177	CYP1A2	Cytochrome P450 1A2	Bupivacaine
P05177	CYP1A2	Cytochrome P450 1A2	Tenofovir
P05177	CYP1A2	Cytochrome P450 1A2	Valproic Acid
P05177	CYP1A2	Cytochrome P450 1A2	Zolmitriptan
P04798	CYP1A1	Cytochrome P450 1A1	Gefitinib
P05177	CYP1A2	Cytochrome P450 1A2	Methadone
P05177	CYP1A2	Cytochrome P450 1A2	Olanzapine
P05177	CYP1A2	Cytochrome P450 1A2	Pyrazinamide
P05181	CYP2E1	Cytochrome P450 2E1	Trimethadione
P05177	CYP1A2	Cytochrome P450 1A2	Aminoglutethimide
P05181	CYP2E1	Cytochrome P450 2E1	Sulfadiazine
P05177	CYP1A2	Cytochrome P450 1A2	Norepinephrine
P05177	CYP1A2	Cytochrome P450 1A2	Mirtazapine
P05181	CYP2E1	Cytochrome P450 2E1	Meprobamate
P05177	CYP1A2	Cytochrome P450 1A2	Palonosetron
P05177	CYP1A2	Cytochrome P450 1A2	Triamterene
P05177	CYP1A2	Cytochrome P450 1A2	Phenylephrine
P05177	CYP1A2	Cytochrome P450 1A2	Phenylpropanolamine
P05177	CYP1A2	Cytochrome P450 1A2	Sorafenib
P05177	CYP1A2	Cytochrome P450 1A2	Griseofulvin
P05177	CYP1A2	Cytochrome P450 1A2	Nisoldipine
P05177	CYP1A2	Cytochrome P450 1A2	Rosiglitazone
P05177	CYP1A2	Cytochrome P450 1A2	Secobarbital
P05177	CYP1A2	Cytochrome P450 1A2	Promazine
P05177	CYP1A2	Cytochrome P450 1A2	Zolpidem
P05177	CYP1A2	Cytochrome P450 1A2	Nitric Oxide
P04798	CYP1A1	Cytochrome P450 1A1	Prazosin
P05177	CYP1A2	Cytochrome P450 1A2	Nabumetone
P05177	CYP1A2	Cytochrome P450 1A2	Enoxacin
P04798	CYP1A1	Cytochrome P450 1A1	Dronabinol
P05177	CYP1A2	Cytochrome P450 1A2	Fluoxetine
P05177	CYP1A2	Cytochrome P450 1A2	Duloxetine
P05177	CYP1A2	Cytochrome P450 1A2	Pefloxacin
P05181	CYP2E1	Cytochrome P450 2E1	Dextromethorphan
P15559	NQO1	NAD(P)H dehydrogenase [quinone] 1	Cisplatin
P05177	CYP1A2	Cytochrome P450 1A2	Alitretinoin
P05177	CYP1A2	Cytochrome P450 1A2	Ciprofloxacin
P05177	CYP1A2	Cytochrome P450 1A2	Fluorouracil
P05177	CYP1A2	Cytochrome P450 1A2	Carbamazepine
P05177	CYP1A2	Cytochrome P450 1A2	Atropine
Q01740	FMO1	Dimethylaniline monooxygenase [N-oxide-forming] 1	Voriconazole
P05181	CYP2E1	Cytochrome P450 2E1	Ethosuximide
P05181	CYP2E1	Cytochrome P450 2E1	Thiopental
P05177	CYP1A2	Cytochrome P450 1A2	Cisapride
P05177	CYP1A2	Cytochrome P450 1A2	Nafcillin
P04798	CYP1A1	Cytochrome P450 1A1	Chloroquine
P04798	CYP1A1	Cytochrome P450 1A1	Amodiaquine
P05177	CYP1A2	Cytochrome P450 1A2	Rifabutin
P05181	CYP2E1	Cytochrome P450 2E1	Paramethadione
P05177	CYP1A2	Cytochrome P450 1A2	Imatinib
P05181	CYP2E1	Cytochrome P450 2E1	Nicardipine
P04798	CYP1A1	Cytochrome P450 1A1	Testosterone
P05177	CYP1A2	Cytochrome P450 1A2	Efavirenz
P05177	CYP1A2	Cytochrome P450 1A2	Guanabenz
P04798	CYP1A1	Cytochrome P450 1A1	Mebendazole
P05177	CYP1A2	Cytochrome P450 1A2	Verapamil
P05177	CYP1A2	Cytochrome P450 1A2	Epinephrine
P05177	CYP1A2	Cytochrome P450 1A2	Aprepitant
P05177	CYP1A2	Cytochrome P450 1A2	Losartan
P05181	CYP2E1	Cytochrome P450 2E1	Midazolam
P05181	CYP2E1	Cytochrome P450 2E1	Flurazepam
P04798	CYP1A1	Cytochrome P450 1A1	Fluorescein
P05177	CYP1A2	Cytochrome P450 1A2	Ergotamine
P05177	CYP1A2	Cytochrome P450 1A2	Tizanidine
P05181	CYP2E1	Cytochrome P450 2E1	Methazolamide
P05177	CYP1A2	Cytochrome P450 1A2	Delavirdine
P05177	CYP1A2	Cytochrome P450 1A2	Imiquimod
P05177	CYP1A2	Cytochrome P450 1A2	Meclizine
P05177	CYP1A2	Cytochrome P450 1A2	Zileuton
P05177	CYP1A2	Cytochrome P450 1A2	Modafinil
P05181	CYP2E1	Cytochrome P450 2E1	Carbinoxamine
P05181	CYP2E1	Cytochrome P450 2E1	Isoflurane
P04798	CYP1A1	Cytochrome P450 1A1	Tretinoin
P05177	CYP1A2	Cytochrome P450 1A2	Clopidogrel
P05177	CYP1A2	Cytochrome P450 1A2	Malathion
P05177	CYP1A2	Cytochrome P450 1A2	Roxithromycin
P05181	CYP2E1	Cytochrome P450 2E1	Phenelzine
P05177	CYP1A2	Cytochrome P450 1A2	Naproxen
P05177	CYP1A2	Cytochrome P450 1A2	Primidone
P04798	CYP1A1	Cytochrome P450 1A1	Dicyclomine
P05177	CYP1A2	Cytochrome P450 1A2	Pentoxifylline
P05181	CYP2E1	Cytochrome P450 2E1	Disulfiram
P05177	CYP1A2	Cytochrome P450 1A2	Trifluoperazine
P05181	CYP2E1	Cytochrome P450 2E1	Brompheniramine
P05177	CYP1A2	Cytochrome P450 1A2	Perphenazine
P05177	CYP1A2	Cytochrome P450 1A2	Terbinafine
P05177	CYP1A2	Cytochrome P450 1A2	Ranitidine
P05181	CYP2E1	Cytochrome P450 2E1	Isosorbide Dinitrate
P04798	CYP1A1	Cytochrome P450 1A1	Granisetron
P05177	CYP1A2	Cytochrome P450 1A2	Dinoprostone
P05177	CYP1A2	Cytochrome P450 1A2	Buprenorphine
P05177	CYP1A2	Cytochrome P450 1A2	Cyclobenzaprine
P05177	CYP1A2	Cytochrome P450 1A2	Maprotiline
P05181	CYP2E1	Cytochrome P450 2E1	Felbamate
P05177	CYP1A2	Cytochrome P450 1A2	Rizatriptan
P15559	NQO1	NAD(P)H dehydrogenase [quinone] 1	Carboplatin
P05177	CYP1A2	Cytochrome P450 1A2	Desloratadine
P05177	CYP1A2	Cytochrome P450 1A2	Edetic Acid
P05177	CYP1A2	Cytochrome P450 1A2	Telithromycin
P05177	CYP1A2	Cytochrome P450 1A2	Lomefloxacin
P05177	CYP1A2	Cytochrome P450 1A2	Ramelteon
P05177	CYP1A2	Cytochrome P450 1A2	Dopamine
P08263	GSTA1	Glutathione S-transferase A1	Azathioprine
P15559	NQO1	NAD(P)H dehydrogenase [quinone] 1	Doxorubicin
P05177	CYP1A2	Cytochrome P450 1A2	Frovatriptan
P05177	CYP1A2	Cytochrome P450 1A2	Levobupivacaine
P08263	GSTA1	Glutathione S-transferase A1	Busulfan
P05181	CYP2E1	Cytochrome P450 2E1	Metyrapone
P05177	CYP1A2	Cytochrome P450 1A2	Cinacalcet
P05177	CYP1A2	Cytochrome P450 1A2	Irbesartan
P05177	CYP1A2	Cytochrome P450 1A2	Tocainide
P05177	CYP1A2	Cytochrome P450 1A2	Praziquantel
P04798	CYP1A1	Cytochrome P450 1A1	Isoprenaline
P05181	CYP2E1	Cytochrome P450 2E1	Clonazepam
P05177	CYP1A2	Cytochrome P450 1A2	Diphenhydramine
P05181	CYP2E1	Cytochrome P450 2E1	Pilocarpine
P04798	CYP1A1	Cytochrome P450 1A1	Ouabain
P05177	CYP1A2	Cytochrome P450 1A2	Hesperetin
P05177	CYP1A2	Cytochrome P450 1A2	Leflunomide
P05177	CYP1A2	Cytochrome P450 1A2	Sertraline
P05181	CYP2E1	Cytochrome P450 2E1	Econazole
P05177	CYP1A2	Cytochrome P450 1A2	Levofloxacin
P05177	CYP1A2	Cytochrome P450 1A2	Doxepin
Q16850	CYP51A1	Lanosterol 14-alpha demethylase	Sertaconazole
P05181	CYP2E1	Cytochrome P450 2E1	Halothane
P05177	CYP1A2	Cytochrome P450 1A2	Ofloxacin
P05177	CYP1A2	Cytochrome P450 1A2	Cilostazol
P04798	CYP1A1	Cytochrome P450 1A1	Arsenic trioxide
P05177	CYP1A2	Cytochrome P450 1A2	Moclobemide
P05181	CYP2E1	Cytochrome P450 2E1	Orphenadrine
P05177	CYP1A2	Cytochrome P450 1A2	Propafenone
P05177	CYP1A2	Cytochrome P450 1A2	Domperidone
P05181	CYP2E1	Cytochrome P450 2E1	Zopiclone
P05177	CYP1A2	Cytochrome P450 1A2	Bromocriptine
P05181	CYP2E1	Cytochrome P450 2E1	Mitoxantrone
P05177	CYP1A2	Cytochrome P450 1A2	Clarithromycin
P05181	CYP2E1	Cytochrome P450 2E1	Fomepizole
P05177	CYP1A2	Cytochrome P450 1A2	Anastrozole
P05181	CYP2E1	Cytochrome P450 2E1	Sevoflurane
P05177	CYP1A2	Cytochrome P450 1A2	Gemfibrozil
P05177	CYP1A2	Cytochrome P450 1A2	Clomipramine
P05177	CYP1A2	Cytochrome P450 1A2	Lumiracoxib
P05181	CYP2E1	Cytochrome P450 2E1	Glucosamine
P05177	CYP1A2	Cytochrome P450 1A2	Oxtriphylline
P05177	CYP1A2	Cytochrome P450 1A2	Insulin Aspart
P05177	CYP1A2	Cytochrome P450 1A2	Insulin Detemir
P05177	CYP1A2	Cytochrome P450 1A2	Insulin Glulisine
P05177	CYP1A2	Cytochrome P450 1A2	Rasagiline
P04798	CYP1A1	Cytochrome P450 1A1	Bezafibrate
P05181	CYP2E1	Cytochrome P450 2E1	Colchicine
P05177	CYP1A2	Cytochrome P450 1A2	Acenocoumarol
P05177	CYP1A2	Cytochrome P450 1A2	Aminophenazone
P05181	CYP2E1	Cytochrome P450 2E1	Ursodeoxycholic acid
P05181	CYP2E1	Cytochrome P450 2E1	Nitrazepam
P05177	CYP1A2	Cytochrome P450 1A2	Lopinavir
P05177	CYP1A2	Cytochrome P450 1A2	Pipotiazine
P05177	CYP1A2	Cytochrome P450 1A2	Thiothixene
P05181	CYP2E1	Cytochrome P450 2E1	Nicotinamide
P05177	CYP1A2	Cytochrome P450 1A2	Estropipate
P05181	CYP2E1	Cytochrome P450 2E1	Bifonazole
P04798	CYP1A1	Cytochrome P450 1A1	Debrisoquin
P05181	CYP2E1	Cytochrome P450 2E1	Trabectedin
P05177	CYP1A2	Cytochrome P450 1A2	Rotigotine
P05177	CYP1A2	Cytochrome P450 1A2	inhaled insulin
Q01740	FMO1	Dimethylaniline monooxygenase [N-oxide-forming] 1	Vandetanib
P05177	CYP1A2	Cytochrome P450 1A2	Mianserin
P04798	CYP1A1	Cytochrome P450 1A1	Romidepsin
P05181	CYP2E1	Cytochrome P450 2E1	Rufinamide
P05177	CYP1A2	Cytochrome P450 1A2	Eltrombopag
P05177	CYP1A2	Cytochrome P450 1A2	Asenapine
P05177	CYP1A2	Cytochrome P450 1A2	Simeprevir
P05177	CYP1A2	Cytochrome P450 1A2	Oxymetholone
P05177	CYP1A2	Cytochrome P450 1A2	Armodafinil
P05177	CYP1A2	Cytochrome P450 1A2	Pazopanib
P05177	CYP1A2	Cytochrome P450 1A2	Agomelatine
P05177	CYP1A2	Cytochrome P450 1A2	Apixaban
P05177	CYP1A2	Cytochrome P450 1A2	Axitinib
P05181	CYP2E1	Cytochrome P450 2E1	Dalfampridine
P05181	CYP2E1	Cytochrome P450 2E1	Ethanolamine Oleate
P05177	CYP1A2	Cytochrome P450 1A2	Niclosamide
P05177	CYP1A2	Cytochrome P450 1A2	Sulconazole
P05177	CYP1A2	Cytochrome P450 1A2	Rilpivirine
P05177	CYP1A2	Cytochrome P450 1A2	Ulipristal
P05181	CYP2E1	Cytochrome P450 2E1	Fingolimod
P05177	CYP1A2	Cytochrome P450 1A2	Vemurafenib
P05177	CYP1A2	Cytochrome P450 1A2	Pomalidomide
P04798	CYP1A1	Cytochrome P450 1A1	Riociguat
P05177	CYP1A2	Cytochrome P450 1A2	Osimertinib
P05177	CYP1A2	Cytochrome P450 1A2	Ixazomib
